# Supplementary material
Source: Research Square preprint supplement (doi:10.21203/rs.3.rs-9131302/v1)
Supplement: Supplementary file 1 [file 2a9a53f9263e3ac712e27350.docx]

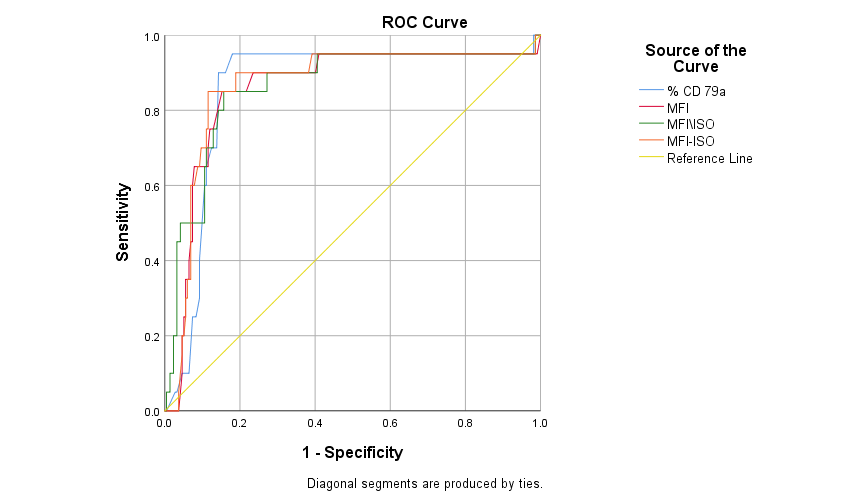


**Supplementary figure (1): ROC Curves for CD79a Quantification Methods and Their Classification Accuracy**

|  | Cut off value | Area under the curve | Sensitivity | specificity | P-value |
| --- | --- | --- | --- | --- | --- |
| % CD 79 a | 73.5 | .856 | 95.0% | 82.0% | <0.001 |
| MFI | 105.5 | .855 | 90.0% | 76.5% | <0.001 |
| MFI/ISO | 6.1 | .861 | 90.0% | 72.8% | <0.001 |
| MFI-ISO | 98 | .862 | 90% | 81.1% | <0.001 |

**Supplementary table (1) : Optimal Cutoff Values and Diagnostic Performance of CD79a Expression Metrics**

**Status at the end of the study**

| **OS.status** | | | |
| --- | --- | --- | --- |
|  | | Frequency | Percent |
| Valid | Alive | 231 | 69.8 |
| Died | 100 | 30.2 |
| Total | 331 | 100.0 |

**Follow up period**

|  | Valid N | Median | Minimum | Maximum |
| --- | --- | --- | --- | --- |
| FU time (months) | 331 | 48.65 | .10 | 104.05 |

**CD79a**

| **11. CD79a (Qualitative)** | | | | | | |
| --- | --- | --- | --- | --- | --- | --- |
|  | | | Frequency | | Percent | |
| Valid | Positive | | 281 | | 84.9 | |
| Negative | | 50 | | 15.1 | |
| Total | | 331 | | 100.0 | |
| **Percent** | | | | | | | | |
|  | | | | Frequency | | Percent | | Valid Percent |
| Valid | | < 43.0 | | 148 | | 44.7 | | 49.8 |
| >=43.0 | | 149 | | 45.0 | | 50.2 |
| Total | | 297 | | 89.7 | | 100.0 |
| Missing | | System | | 34 | | 10.3 | |  |
| Total | | | | 331 | | 100.0 | |  |

| **MFI1** | | | | |
| --- | --- | --- | --- | --- |
|  | | Frequency | Percent | Valid Percent |
| Valid | < 77 | 138 | 41.7 | 49.8 |
| >=77 | 139 | 42.0 | 50.2 |
| Total | 277 | 83.7 | 100.0 |
| Missing | System | 54 | 16.3 |  |
| Total | | 331 | 100.0 |  |

| **Iso1** | | | | |
| --- | --- | --- | --- | --- |
|  | | Frequency | Percent | Valid Percent |
| Valid | < 15 | 120 | 36.3 | 43.3 |
| >=15 | 157 | 47.4 | 56.7 |
| Total | 277 | 83.7 | 100.0 |
| Missing | System | 54 | 16.3 |  |
| Total | | 331 | 100.0 |  |
| **MFI.ISO1** | | | | |
|  | | Frequency | Percent | Valid Percent |
| Valid | < 4.8 | 136 | 41.1 | 49.1 |
| >=4.8 | 141 | 42.6 | 50.9 |
| Total | 277 | 83.7 | 100.0 |
| Missing | System | 54 | 16.3 |  |
| Total | | 331 | 100.0 |  |

| **MFI-ISO1** | | | | |
| --- | --- | --- | --- | --- |
|  | | Frequency | Percent | Valid Percent |
| Valid | < 60 | 136 | 41.1 | 49.1 |
| >=60 | 141 | 42.6 | 50.9 |
| Total | 277 | 83.7 | 100.0 |
| Missing | System | 54 | 16.3 |  |
| Total | | 331 | 100.0 |  |

**ALL group**

**Kaplan-Meier**

| **Case Processing Summary** | | | |
| --- | --- | --- | --- |
| Total N | N of Events | Censored | |
| N | Percent |
| **331** | **100** | 231 | 69.8% |

| **Survival Table** | | | | | | |
| --- | --- | --- | --- | --- | --- | --- |
|  | Time | Status | Cumulative Proportion Surviving at the Time | | N of Cumulative Events | N of Remaining Cases |
| Estimate | Std. Error |
| 1 | .100 | Died | .997 | .003 | 1 | 330 |
| 2 | .330 | Died | .994 | .004 | 2 | 329 |
| 3 | .390 | Died | .991 | .005 | 3 | 328 |
| 4 | .460 | Died | . | . | 4 | 327 |
| 5 | .460 | Died | . | . | 5 | 326 |
| 6 | .460 | Died | .982 | .007 | 6 | 325 |
| 7 | .490 | Died | . | . | 7 | 324 |
| 8 | .490 | Died | .976 | .008 | 8 | 323 |
| 9 | .530 | Died | .973 | .009 | 9 | 322 |
| 10 | .560 | Died | . | . | 10 | 321 |
| 11 | .560 | Died | . | . | 11 | 320 |
| 12 | .560 | Died | . | . | 12 | 319 |
| 13 | .560 | Died | .961 | .011 | 13 | 318 |
| 14 | .590 | Died | .958 | .011 | 14 | 317 |
| 15 | .630 | Died | . | . | 15 | 316 |
| 16 | .630 | Died | . | . | 16 | 315 |
| 17 | .630 | Died | . | . | 17 | 314 |
| 18 | .630 | Died | . | . | 18 | 313 |
| 19 | .630 | Died | .943 | .013 | 19 | 312 |
| 20 | .690 | Died | .940 | .013 | 20 | 311 |
| 21 | .720 | Died | . | . | 21 | 310 |
| 22 | .720 | Died | .934 | .014 | 22 | 309 |
| 23 | .760 | Died | . | . | 23 | 308 |
| 24 | .760 | Died | .927 | .014 | 24 | 307 |
| 25 | .790 | Died | . | . | 25 | 306 |
| 26 | .790 | Died | .921 | .015 | 26 | 305 |
| 27 | .820 | Died | .918 | .015 | 27 | 304 |
| 28 | .860 | Died | .915 | .015 | 28 | 303 |
| 29 | .890 | Died | . | . | 29 | 302 |
| 30 | .890 | Died | .909 | .016 | 30 | 301 |
| 31 | .920 | Died | .906 | .016 | 31 | 300 |
| 32 | .950 | Died | . | . | 32 | 299 |
| 33 | .950 | Died | .900 | .016 | 33 | 298 |
| 34 | 1.020 | Died | .897 | .017 | 34 | 297 |
| 35 | 1.120 | Died | .894 | .017 | 35 | 296 |
| 36 | 1.480 | Alive | . | . | 35 | 295 |
| 37 | 3.850 | Died | .891 | .017 | 36 | 294 |
| 38 | 4.570 | Died | .888 | .017 | 37 | 293 |
| 39 | 4.740 | Died | .885 | .018 | 38 | 292 |
| 40 | 4.970 | Died | .882 | .018 | 39 | 291 |
| 41 | 5.390 | Died | .879 | .018 | 40 | 290 |
| 42 | 5.760 | Died | .876 | .018 | 41 | 289 |
| 43 | 5.890 | Died | .873 | .018 | 42 | 288 |
| 44 | 6.120 | Died | .870 | .018 | 43 | 287 |
| 45 | 6.250 | Died | .867 | .019 | 44 | 286 |
| 46 | 6.410 | Died | .864 | .019 | 45 | 285 |
| 47 | 6.510 | Died | .861 | .019 | 46 | 284 |
| 48 | 7.660 | Died | .858 | .019 | 47 | 283 |
| 49 | 7.990 | Died | .855 | .019 | 48 | 282 |
| 50 | 8.420 | Died | .852 | .020 | 49 | 281 |
| 51 | 8.590 | Died | .849 | .020 | 50 | 280 |
| 52 | 9.540 | Died | .846 | .020 | 51 | 279 |
| 53 | 11.380 | Died | .843 | .020 | 52 | 278 |
| 54 | 11.510 | Died | .840 | .020 | 53 | 277 |
| 55 | 11.680 | Died | .837 | .020 | 54 | 276 |
| 56 | 12.200 | Died | .834 | .020 | 55 | 275 |
| 57 | 13.060 | Died | .831 | .021 | 56 | 274 |
| 58 | 13.390 | Died | . | . | 57 | 273 |
| 59 | 13.390 | Died | .825 | .021 | 58 | 272 |
| 60 | 14.310 | Died | .822 | .021 | 59 | 271 |
| 61 | 15.230 | Died | .818 | .021 | 60 | 270 |
| 62 | 16.280 | Died | .815 | .021 | 61 | 269 |
| 63 | 16.680 | Died | .812 | .021 | 62 | 268 |
| 64 | 17.240 | Died | .809 | .022 | 63 | 267 |
| 65 | 17.340 | Died | .806 | .022 | 64 | 266 |
| 66 | 19.970 | Alive | . | . | 64 | 265 |
| 67 | 20.000 | Died | .803 | .022 | 65 | 264 |
| 68 | 21.090 | Died | .800 | .022 | 66 | 263 |
| 69 | 21.680 | Died | .797 | .022 | 67 | 262 |
| 70 | 21.910 | Died | .794 | .022 | 68 | 261 |
| 71 | 21.970 | Died | .791 | .022 | 69 | 260 |
| 72 | 22.240 | Died | .788 | .022 | 70 | 259 |
| 73 | 22.300 | Died | .785 | .023 | 71 | 258 |
| 74 | 22.470 | Died | .782 | .023 | 72 | 257 |
| 75 | 24.310 | Died | .779 | .023 | 73 | 256 |
| 76 | 24.410 | Died | .776 | .023 | 74 | 255 |
| 77 | 25.200 | Died | .773 | .023 | 75 | 254 |
| 78 | 25.300 | Died | .770 | .023 | 76 | 253 |
| 79 | 27.830 | Died | .767 | .023 | 77 | 252 |
| 80 | 28.850 | Alive | . | . | 77 | 251 |
| 81 | 29.570 | Died | .764 | .023 | 78 | 250 |
| 82 | 29.670 | Died | .761 | .023 | 79 | 249 |
| 83 | 30.230 | Died | .758 | .024 | 80 | 248 |
| 84 | 31.150 | Died | .755 | .024 | 81 | 247 |
| 85 | 31.840 | Died | .752 | .024 | 82 | 246 |
| 86 | 32.700 | Died | .748 | .024 | 83 | 245 |
| 87 | 34.140 | Alive | . | . | 83 | 244 |
| 88 | 34.280 | Died | .745 | .024 | 84 | 243 |
| 89 | 35.390 | Alive | . | . | 84 | 242 |
| 90 | 36.450 | Died | .742 | .024 | 85 | 241 |
| 91 | 37.010 | Alive | . | . | 85 | 240 |
| 92 | 37.600 | Alive | . | . | 85 | 239 |
| 93 | 37.600 | Alive | . | . | 85 | 238 |
| 94 | 37.630 | Alive | . | . | 85 | 237 |
| 95 | 37.660 | Died | .739 | .024 | 86 | 236 |
| 96 | 37.660 | Alive | . | . | 86 | 235 |
| 97 | 37.760 | Alive | . | . | 86 | 234 |
| 98 | 37.830 | Alive | . | . | 86 | 233 |
| 99 | 37.860 | Alive | . | . | 86 | 232 |
| 100 | 38.390 | Died | .736 | .024 | 87 | 231 |
| 101 | 38.390 | Alive | . | . | 87 | 230 |
| 102 | 38.750 | Alive | . | . | 87 | 229 |
| 103 | 39.050 | Alive | . | . | 87 | 228 |
| 104 | 39.210 | Died | .733 | .024 | 88 | 227 |
| 105 | 39.210 | Alive | . | . | 88 | 226 |
| 106 | 39.210 | Alive | . | . | 88 | 225 |
| 107 | 39.240 | Alive | . | . | 88 | 224 |
| 108 | 39.340 | Alive | . | . | 88 | 223 |
| 109 | 39.510 | Alive | . | . | 88 | 222 |
| 110 | 39.570 | Alive | . | . | 88 | 221 |
| 111 | 39.570 | Alive | . | . | 88 | 220 |
| 112 | 39.700 | Alive | . | . | 88 | 219 |
| 113 | 39.740 | Alive | . | . | 88 | 218 |
| 114 | 39.800 | Alive | . | . | 88 | 217 |
| 115 | 39.970 | Alive | . | . | 88 | 216 |
| 116 | 40.200 | Alive | . | . | 88 | 215 |
| 117 | 40.430 | Alive | . | . | 88 | 214 |
| 118 | 40.490 | Alive | . | . | 88 | 213 |
| 119 | 40.590 | Alive | . | . | 88 | 212 |
| 120 | 40.660 | Alive | . | . | 88 | 211 |
| 121 | 41.380 | Alive | . | . | 88 | 210 |
| 122 | 41.680 | Alive | . | . | 88 | 209 |
| 123 | 41.680 | Alive | . | . | 88 | 208 |
| 124 | 41.710 | Alive | . | . | 88 | 207 |
| 125 | 41.740 | Alive | . | . | 88 | 206 |
| 126 | 41.970 | Died | .729 | .025 | 89 | 205 |
| 127 | 41.970 | Alive | . | . | 89 | 204 |
| 128 | 42.270 | Alive | . | . | 89 | 203 |
| 129 | 42.430 | Alive | . | . | 89 | 202 |
| 130 | 42.500 | Alive | . | . | 89 | 201 |
| 131 | 42.700 | Died | .726 | .025 | 90 | 200 |
| 132 | 42.760 | Alive | . | . | 90 | 199 |
| 133 | 43.130 | Alive | . | . | 90 | 198 |
| 134 | 43.390 | Alive | . | . | 90 | 197 |
| 135 | 43.420 | Alive | . | . | 90 | 196 |
| 136 | 43.490 | Alive | . | . | 90 | 195 |
| 137 | 43.590 | Alive | . | . | 90 | 194 |
| 138 | 43.650 | Alive | . | . | 90 | 193 |
| 139 | 43.980 | Alive | . | . | 90 | 192 |
| 140 | 44.080 | Alive | . | . | 90 | 191 |
| 141 | 44.740 | Alive | . | . | 90 | 190 |
| 142 | 45.230 | Alive | . | . | 90 | 189 |
| 143 | 45.430 | Alive | . | . | 90 | 188 |
| 144 | 45.590 | Alive | . | . | 90 | 187 |
| 145 | 45.790 | Alive | . | . | 90 | 186 |
| 146 | 46.050 | Alive | . | . | 90 | 185 |
| 147 | 46.120 | Alive | . | . | 90 | 184 |
| 148 | 46.180 | Alive | . | . | 90 | 183 |
| 149 | 46.280 | Alive | . | . | 90 | 182 |
| 150 | 46.280 | Alive | . | . | 90 | 181 |
| 151 | 46.580 | Alive | . | . | 90 | 180 |
| 152 | 46.740 | Died | .722 | .025 | 91 | 179 |
| 153 | 46.780 | Alive | . | . | 91 | 178 |
| 154 | 46.910 | Died | .717 | .025 | 92 | 177 |
| 155 | 47.170 | Alive | . | . | 92 | 176 |
| 156 | 47.270 | Alive | . | . | 92 | 175 |
| 157 | 47.300 | Alive | . | . | 92 | 174 |
| 158 | 47.300 | Alive | . | . | 92 | 173 |
| 159 | 47.500 | Alive | . | . | 92 | 172 |
| 160 | 47.760 | Alive | . | . | 92 | 171 |
| 161 | 47.830 | Alive | . | . | 92 | 170 |
| 162 | 48.030 | Alive | . | . | 92 | 169 |
| 163 | 48.190 | Alive | . | . | 92 | 168 |
| 164 | 48.450 | Alive | . | . | 92 | 167 |
| 165 | 48.550 | Died | .713 | .025 | 93 | 166 |
| 166 | 48.650 | Alive | . | . | 93 | 165 |
| 167 | 49.010 | Died | .709 | .025 | 94 | 164 |
| 168 | 49.180 | Alive | . | . | 94 | 163 |
| 169 | 49.240 | Alive | . | . | 94 | 162 |
| 170 | 49.280 | Alive | . | . | 94 | 161 |
| 171 | 49.310 | Alive | . | . | 94 | 160 |
| 172 | 49.410 | Alive | . | . | 94 | 159 |
| 173 | 49.670 | Alive | . | . | 94 | 158 |
| 174 | 49.800 | Alive | . | . | 94 | 157 |
| 175 | 49.840 | Alive | . | . | 94 | 156 |
| 176 | 49.930 | Alive | . | . | 94 | 155 |
| 177 | 50.000 | Alive | . | . | 94 | 154 |
| 178 | 50.260 | Alive | . | . | 94 | 153 |
| 179 | 50.430 | Alive | . | . | 94 | 152 |
| 180 | 50.630 | Alive | . | . | 94 | 151 |
| 181 | 50.720 | Alive | . | . | 94 | 150 |
| 182 | 51.220 | Alive | . | . | 94 | 149 |
| 183 | 51.280 | Alive | . | . | 94 | 148 |
| 184 | 51.320 | Alive | . | . | 94 | 147 |
| 185 | 51.410 | Alive | . | . | 94 | 146 |
| 186 | 51.880 | Alive | . | . | 94 | 145 |
| 187 | 52.040 | Alive | . | . | 94 | 144 |
| 188 | 52.270 | Alive | . | . | 94 | 143 |
| 189 | 52.300 | Alive | . | . | 94 | 142 |
| 190 | 52.430 | Alive | . | . | 94 | 141 |
| 191 | 52.570 | Alive | . | . | 94 | 140 |
| 192 | 52.990 | Alive | . | . | 94 | 139 |
| 193 | 53.060 | Died | **.704** | .026 | 95 | 138 |
| 194 | 53.090 | Alive | . | . | 95 | 137 |
| 195 | 53.320 | Alive | . | . | 95 | 136 |
| 196 | 54.440 | Alive | . | . | 95 | 135 |
| 197 | 54.540 | Alive | . | . | 95 | 134 |
| 198 | 54.930 | Alive | . | . | 95 | 133 |
| 199 | 55.100 | Alive | . | . | 95 | 132 |
| 200 | 55.130 | Alive | . | . | 95 | 131 |
| 201 | 55.200 | Alive | . | . | 95 | 130 |
| 202 | 55.530 | Alive | . | . | 95 | 129 |
| 203 | 55.920 | Alive | . | . | 95 | 128 |
| 204 | 55.920 | Alive | . | . | 95 | 127 |
| 205 | 55.990 | Alive | . | . | 95 | 126 |
| 206 | 56.020 | Alive | . | . | 95 | 125 |
| 207 | 56.280 | Alive | . | . | 95 | 124 |
| 208 | 56.510 | Alive | . | . | 95 | 123 |
| 209 | 57.040 | Alive | . | . | 95 | 122 |
| 210 | 57.070 | Alive | . | . | 95 | 121 |
| 211 | 57.270 | Alive | . | . | 95 | 120 |
| 212 | 57.430 | Alive | . | . | 95 | 119 |
| 213 | 57.700 | Alive | . | . | 95 | 118 |
| 214 | 57.800 | Alive | . | . | 95 | 117 |
| 215 | 57.930 | Alive | . | . | 95 | 116 |
| 216 | 58.060 | Alive | . | . | 95 | 115 |
| 217 | 58.260 | Alive | . | . | 95 | 114 |
| 218 | 58.290 | Alive | . | . | 95 | 113 |
| 219 | 58.590 | Alive | . | . | 95 | 112 |
| 220 | 59.050 | Alive | . | . | 95 | 111 |
| 221 | 59.110 | Alive | . | . | 95 | 110 |
| 222 | 59.140 | Alive | . | . | 95 | 109 |
| 223 | 59.240 | Alive | . | . | 95 | 108 |
| 224 | 59.240 | Alive | . | . | 95 | 107 |
| 225 | 59.410 | Alive | . | . | 95 | 106 |
| 226 | 59.510 | Alive | . | . | 95 | 105 |
| 227 | 60.200 | Alive | . | . | 95 | 104 |
| 228 | 60.360 | Alive | . | . | 95 | 103 |
| 229 | 60.530 | Alive | . | . | 95 | 102 |
| 230 | 60.790 | Alive | . | . | 95 | 101 |
| 231 | 61.020 | Alive | . | . | 95 | 100 |
| 232 | 61.220 | Alive | . | . | 95 | 99 |
| 233 | 61.250 | Died | .697 | .027 | 96 | 98 |
| 234 | 61.510 | Alive | . | . | 96 | 97 |
| 235 | 61.840 | Alive | . | . | 96 | 96 |
| 236 | 61.840 | Alive | . | . | 96 | 95 |
| 237 | 61.840 | Alive | . | . | 96 | 94 |
| 238 | 62.140 | Alive | . | . | 96 | 93 |
| 239 | 62.140 | Alive | . | . | 96 | 92 |
| 240 | 62.400 | Alive | . | . | 96 | 91 |
| 241 | 62.800 | Alive | . | . | 96 | 90 |
| 242 | 62.800 | Alive | . | . | 96 | 89 |
| 243 | 63.060 | Alive | . | . | 96 | 88 |
| 244 | 63.320 | Alive | . | . | 96 | 87 |
| 245 | 63.590 | Alive | . | . | 96 | 86 |
| 246 | 63.850 | Alive | . | . | 96 | 85 |
| 247 | 63.910 | Died | .688 | .027 | 97 | 84 |
| 248 | 64.510 | Alive | . | . | 97 | 83 |
| 249 | 64.640 | Alive | . | . | 97 | 82 |
| 250 | 64.800 | Alive | . | . | 97 | 81 |
| 251 | 64.900 | Alive | . | . | 97 | 80 |
| 252 | 65.330 | Alive | . | . | 97 | 79 |
| 253 | 65.560 | Alive | . | . | 97 | 78 |
| 254 | 66.090 | Alive | . | . | 97 | 77 |
| 255 | 66.280 | Alive | . | . | 97 | 76 |
| 256 | 67.040 | Alive | . | . | 97 | 75 |
| 257 | 67.340 | Alive | . | . | 97 | 74 |
| 258 | 67.830 | Alive | . | . | 97 | 73 |
| 259 | 68.090 | Alive | . | . | 97 | 72 |
| 260 | 68.850 | Alive | . | . | 97 | 71 |
| 261 | 68.850 | Alive | . | . | 97 | 70 |
| 262 | 69.240 | Alive | . | . | 97 | 69 |
| 263 | 69.570 | Alive | . | . | 97 | 68 |
| 264 | 69.700 | Alive | . | . | 97 | 67 |
| 265 | 70.390 | Alive | . | . | 97 | 66 |
| 266 | 70.590 | Alive | . | . | 97 | 65 |
| 267 | 71.320 | Alive | . | . | 97 | 64 |
| 268 | 71.380 | Alive | . | . | 97 | 63 |
| 269 | 71.710 | Died | .678 | .029 | 98 | 62 |
| 270 | 72.340 | Alive | . | . | 98 | 61 |
| 271 | 72.370 | Alive | . | . | 98 | 60 |
| 272 | 73.030 | Alive | . | . | 98 | 59 |
| 273 | 73.060 | Alive | . | . | 98 | 58 |
| 274 | 73.910 | Alive | . | . | 98 | 57 |
| 275 | 74.080 | Died | .666 | .031 | 99 | 56 |
| 276 | 74.110 | Alive | . | . | 99 | 55 |
| 277 | 74.640 | Alive | . | . | 99 | 54 |
| 278 | 75.160 | Alive | . | . | 99 | 53 |
| 279 | 75.720 | Alive | . | . | 99 | 52 |
| 280 | 75.820 | Alive | . | . | 99 | 51 |
| 281 | 75.920 | Alive | . | . | 99 | 50 |
| 282 | 76.150 | Alive | . | . | 99 | 49 |
| 283 | 76.250 | Alive | . | . | 99 | 48 |
| 284 | 76.450 | Alive | . | . | 99 | 47 |
| 285 | 76.640 | Alive | . | . | 99 | 46 |
| 286 | 78.850 | Alive | . | . | 99 | 45 |
| 287 | 79.800 | Alive | . | . | 99 | 44 |
| 288 | 79.840 | Alive | . | . | 99 | 43 |
| 289 | 79.870 | Alive | . | . | 99 | 42 |
| 290 | 80.000 | Alive | . | . | 99 | 41 |
| 291 | 80.100 | Alive | . | . | 99 | 40 |
| 292 | 80.890 | Alive | . | . | 99 | 39 |
| 293 | 80.950 | Alive | . | . | 99 | 38 |
| 294 | 81.090 | Alive | . | . | 99 | 37 |
| 295 | 81.780 | Alive | . | . | 99 | 36 |
| 296 | 81.970 | Died | .647 | .035 | 100 | 35 |
| 297 | 82.760 | Alive | . | . | 100 | 34 |
| 298 | 83.160 | Alive | . | . | 100 | 33 |
| 299 | 85.260 | Alive | . | . | 100 | 32 |
| 300 | 85.890 | Alive | . | . | 100 | 31 |
| 301 | 86.640 | Alive | . | . | 100 | 30 |
| 302 | 87.200 | Alive | . | . | 100 | 29 |
| 303 | 87.630 | Alive | . | . | 100 | 28 |
| 304 | 88.130 | Alive | . | . | 100 | 27 |
| 305 | 88.190 | Alive | . | . | 100 | 26 |
| 306 | 88.220 | Alive | . | . | 100 | 25 |
| 307 | 88.720 | Alive | . | . | 100 | 24 |
| 308 | 88.720 | Alive | . | . | 100 | 23 |
| 309 | 89.050 | Alive | . | . | 100 | 22 |
| 310 | 89.080 | Alive | . | . | 100 | 21 |
| 311 | 90.000 | Alive | . | . | 100 | 20 |
| 312 | 90.820 | Alive | . | . | 100 | 19 |
| 313 | 91.220 | Alive | . | . | 100 | 18 |
| 314 | 91.380 | Alive | . | . | 100 | 17 |
| 315 | 91.510 | Alive | . | . | 100 | 16 |
| 316 | 92.430 | Alive | . | . | 100 | 15 |
| 317 | 92.730 | Alive | . | . | 100 | 14 |
| 318 | 94.340 | Alive | . | . | 100 | 13 |
| 319 | 95.230 | Alive | . | . | 100 | 12 |
| 320 | 95.720 | Alive | . | . | 100 | 11 |
| 321 | 96.250 | Alive | . | . | 100 | 10 |
| 322 | 97.040 | Alive | . | . | 100 | 9 |
| 323 | 97.140 | Alive | . | . | 100 | 8 |
| 324 | 97.170 | Alive | . | . | 100 | 7 |
| 325 | 98.130 | Alive | . | . | 100 | 6 |
| 326 | 98.590 | Alive | . | . | 100 | 5 |
| 327 | 98.820 | Alive | . | . | 100 | 4 |
| 328 | 99.900 | Alive | . | . | 100 | 3 |
| 329 | 100.660 | Alive | . | . | 100 | 2 |
| 330 | 102.400 | Alive | . | . | 100 | 1 |
| 331 | 104.050 | Alive | . | . | 100 | 0 |

| **Medians for Survival Time** | | | |
| --- | --- | --- | --- |
| Median | | | |
|  |  |  | |
|  |  |
| . | . | . | . |


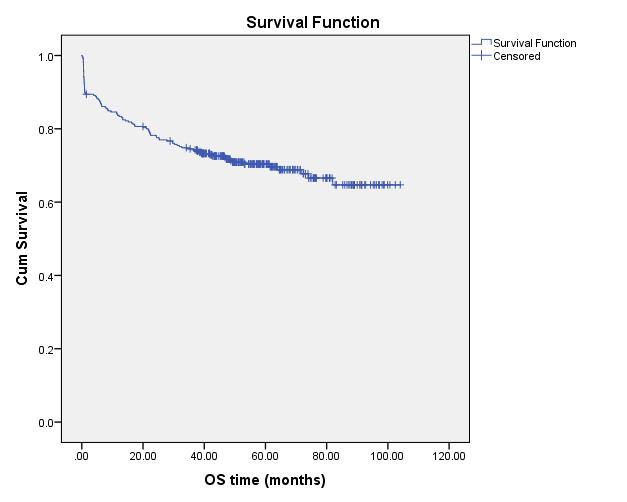


**Kaplan-Meier**

| **Case Processing Summary** | | | | |
| --- | --- | --- | --- | --- |
| 11. CD79a (Qualitative) | Total N | N of Events | Censored | |
| N | Percent |
| Positive | **281** | **91** | 190 | 67.6% |
| Negative | **50** | **9** | 41 | 82.0% |
| Overall | 331 | 100 | 231 | 69.8% |

| **Overall Comparisons** | | | |
| --- | --- | --- | --- |
|  | Chi-Square | df | P-value |
| Log Rank (Mantel-Cox) | 4.726 | 1 | **.030** |
| 11. CD79a (Qualitative) . | | | |


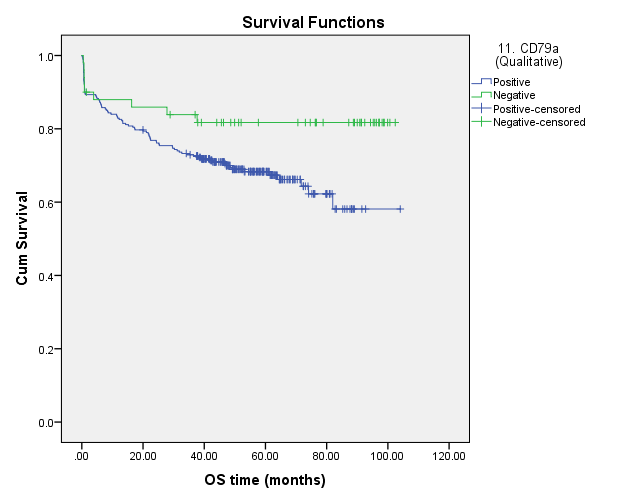


**Kaplan-Meier**

| **Case Processing Summary** | | | | |
| --- | --- | --- | --- | --- |
| Percent | Total N | N of Events | Censored | |
| N | Percent |
| < 43.0 | **148** | **22** | 126 | 85.1% |
| >=43.0 | **149** | **69** | 80 | 53.7% |
| Overall | 297 | 91 | 206 | 69.4% |

| **Medians for Survival Time** | | | | |
| --- | --- | --- | --- | --- |
| Percent | Median | | | |
| Estimate | Std. Error | 95% Confidence Interval | |
| Lower Bound | Upper Bound |
| < 43.0 | . | . | . | . |
| >=43.0 | 71.710 | 13.673 | 44.911 | 98.509 |
| Overall | . | . | . | . |

| **Overall Comparisons** | | | |
| --- | --- | --- | --- |
|  | Chi-Square | df | P-value |
| Log Rank (Mantel-Cox) | 37.111 | 1 | **<0.001** |
| Percent. | | | |


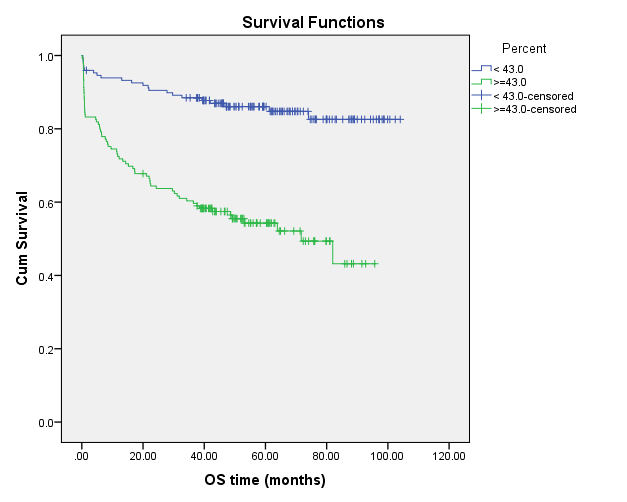


**Kaplan-Meier**

| **Case Processing Summary** | | | | |
| --- | --- | --- | --- | --- |
| MFI1 | Total N | N of Events | Censored | |
| N | Percent |
| < 77 | **138** | **16** | 122 | 88.4% |
| >=77 | **139** | **73** | 66 | 47.5% |
| Overall | 277 | 89 | 188 | 67.9% |

| **Medians for Survival Time** | | | | |
| --- | --- | --- | --- | --- |
| MFI1 | Median | | | |
| Estimate | Std. Error | 95% Confidence Interval | |
| Lower Bound | Upper Bound |
| < 77 | . | . | . | . |
| >=77 | 49.010 | 12.899 | 23.728 | 74.292 |
| Overall | . | . | . | . |

| **Overall Comparisons** | | | |
| --- | --- | --- | --- |
|  | Chi-Square | df | P-value |
| Log Rank (Mantel-Cox) | 54.823 | 1 | **<0.001** |
| MFI1. | | | |


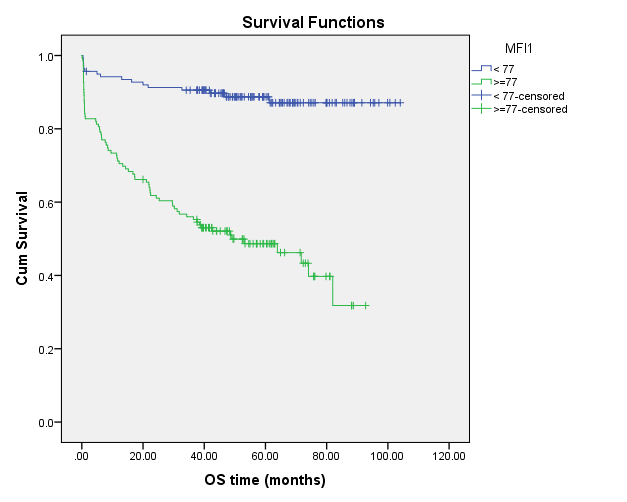


**Kaplan-Meier**

| **Case Processing Summary** | | | | |
| --- | --- | --- | --- | --- |
| Iso1 | Total N | N of Events | Censored | |
| N | Percent |
| < 15 | **120** | **36** | 84 | 70.0% |
| >=15 | **157** | **53** | 104 | 66.2% |
| Overall | 277 | 89 | 188 | 67.9% |

| **Medians for Survival Time** | | | | |
| --- | --- | --- | --- | --- |
| Iso1 | Median | | | |
| Estimate | Std. Error | 95% Confidence Interval | |
| Lower Bound | Upper Bound |
| < 15 | . | . | . | . |
| >=15 | . | . | . | . |
| Overall | . | . | . | . |

| **Overall Comparisons** | | | |
| --- | --- | --- | --- |
|  | Chi-Square | df | P-value |
| Log Rank (Mantel-Cox) | .385 | 1 | **.535** |
| Iso1. | | | |


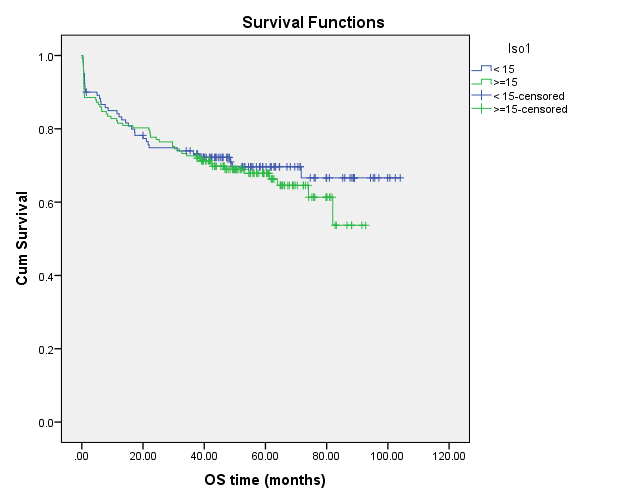


**Kaplan-Meier**

| **Case Processing Summary** | | | | |
| --- | --- | --- | --- | --- |
| MFI/ISO1 | Total N | N of Events | Censored | |
| N | Percent |
| < 4.8 | **136** | **23** | 113 | 83.1% |
| >=4.8 | **141** | **66** | 75 | 53.2% |
| Overall | 277 | 89 | 188 | 67.9% |

| **Medians for Survival Time** | | | | |
| --- | --- | --- | --- | --- |
| MFI/ISO1 | Median | | | |
| Estimate | Std. Error | 95% Confidence Interval | |
| Lower Bound | Upper Bound |
| < 4.8 | . | . | . | . |
| >=4.8 | 63.910 | 11.741 | 40.897 | 86.923 |
| Overall | . | . | . | . |

| **Overall Comparisons** | | | |
| --- | --- | --- | --- |
|  | Chi-Square | df | P-value |
| Log Rank (Mantel-Cox) | 32.716 | 1 | <0.001 |
| MFI.ISO1. | | | |

|  | | | | | | | |
| --- | --- | --- | --- | --- | --- | --- | --- |
|  | |  |  |  | |  |  |
|  |  |
|  |  |  |  |  |  |  |  |
|  |  |  |  |  |  |  |
|  |  |  |  |  |  |  |
|  |  |  |  |  |  |  |
|  |  |  |  |  |  |  |
|  |  |  |  |  |  |  |
|  |  |  |  |  |  |  |
|  |  |  |  |  |  |  |
|  |  |  |  |  |  |  |
|  |  |  |  |  |  |  |
|  |  |  |  |  |  |  |
|  |  |  |  |  |  |  |
|  |  |  |  |  |  |  |
|  |  |  |  |  |  |  |
|  |  |  |  |  |  |  |
|  |  |  |  |  |  |  |
|  |  |  |  |  |  |  |
|  |  |  |  |  |  |  |
|  |  |  |  |  |  |  |
|  |  |  |  |  |  |  |
|  |  |  |  |  |  |  |
|  |  |  |  |  |  |  |
|  |  |  |  |  |  |  |
|  |  |  |  |  |  |  |
|  |  |  |  |  |  |  |
|  |  |  |  |  |  |  |
|  |  |  |  |  |  |  |
|  |  |  |  |  |  |  |
|  |  |  |  |  |  |  |
|  |  |  |  |  |  |  |
|  |  |  |  |  |  |  |
|  |  |  |  |  |  |  |
|  |  |  |  |  |  |  |
|  |  |  |  |  |  |  |
|  |  |  |  |  |  |  |
|  |  |  |  |  |  |  |
|  |  |  |  |  |  |  |
|  |  |  |  |  |  |  |
|  |  |  |  |  |  |  |
|  |  |  |  |  |  |  |
|  |  |  |  |  |  |  |
|  |  |  |  |  |  |  |
|  |  |  |  |  |  |  |
|  |  |  |  |  |  |  |
|  |  |  |  |  |  |  |
|  |  |  |  |  |  |  |
|  |  |  |  |  |  |  |
|  |  |  |  |  |  |  |
|  |  |  |  |  |  |  |
|  |  |  |  |  |  |  |
|  |  |  |  |  |  |  |
|  |  |  |  |  |  |  |
|  |  |  |  |  |  |  |
|  |  |  |  |  |  |  |
|  |  |  |  |  |  |  |
|  |  |  |  |  |  |  |
|  |  |  |  |  |  |  |
|  |  |  |  |  |  |  |
|  |  |  |  |  |  |  |
|  |  |  |  |  |  |  |
|  |  |  |  |  |  |  |
|  |  |  |  |  |  |  |
|  |  |  |  |  |  |  |
|  |  |  |  |  |  |  |
|  |  |  |  |  |  |  |
|  |  |  |  |  |  |  |
|  |  |  |  |  |  |  |
|  |  |  |  |  |  |  |
|  |  |  |  |  |  |  |
|  |  |  |  |  |  |  |
|  |  |  |  |  |  |  |
|  |  |  |  |  |  |  |
|  |  |  |  |  |  |  |
|  |  |  |  |  |  |  |
|  |  |  |  |  |  |  |
|  |  |  |  |  |  |  |
|  |  |  |  |  |  |  |
|  |  |  |  |  |  |  |
|  |  |  |  |  |  |  |
|  |  |  |  |  |  |  |
|  |  |  |  |  |  |  |
|  |  |  |  |  |  |  |
|  |  |  |  |  |  |  |
|  |  |  |  |  |  |  |
|  |  |  |  |  |  |  |
|  |  |  |  |  |  |  |
|  |  |  |  |  |  |  |
|  |  |  |  |  |  |  |
|  |  |  |  |  |  |  |
|  |  |  |  |  |  |  |
|  |  |  |  |  |  |  |
|  |  |  |  |  |  |  |
|  |  |  |  |  |  |  |
|  |  |  |  |  |  |  |
|  |  |  |  |  |  |  |
|  |  |  |  |  |  |  |
|  |  |  |  |  |  |  |
|  |  |  |  |  |  |  |
|  |  |  |  |  |  |  |
|  |  |  |  |  |  |  |
|  |  |  |  |  |  |  |
|  |  |  |  |  |  |  |
|  |  |  |  |  |  |  |
|  |  |  |  |  |  |  |
|  |  |  |  |  |  |  |
|  |  |  |  |  |  |  |
|  |  |  |  |  |  |  |
|  |  |  |  |  |  |  |
|  |  |  |  |  |  |  |
|  |  |  |  |  |  |  |
|  |  |  |  |  |  |  |
|  |  |  |  |  |  |  |
|  |  |  |  |  |  |  |
|  |  |  |  |  |  |  |
|  |  |  |  |  |  |  |
|  |  |  |  |  |  |  |
|  |  |  |  |  |  |  |
|  |  |  |  |  |  |  |
|  |  |  |  |  |  |  |
|  |  |  |  |  |  |  |
|  |  |  |  |  |  |  |
|  |  |  |  |  |  |  |
|  |  |  |  |  |  |  |
|  |  |  |  |  |  |  |
|  |  |  |  |  |  |  |
|  |  |  |  |  |  |  |
|  |  |  |  |  |  |  |
|  |  |  |  |  |  |  |
|  |  |  |  |  |  |  |
|  |  |  |  |  |  |  |
|  |  |  |  |  |  |  |
|  |  |  |  |  |  |  |
|  |  |  |  |  |  |  |
|  |  |  |  |  |  |  |
|  |  |  |  |  |  |  |
|  |  |  |  |  |  |  |
|  |  |  |  |  |  |  |  |
|  |  |  |  |  |  |  |
|  |  |  |  |  |  |  |
|  |  |  |  |  |  |  |
|  |  |  |  |  |  |  |
|  |  |  |  |  |  |  |
|  |  |  |  |  |  |  |
|  |  |  |  |  |  |  |
|  |  |  |  |  |  |  |
|  |  |  |  |  |  |  |
|  |  |  |  |  |  |  |
|  |  |  |  |  |  |  |
|  |  |  |  |  |  |  |
|  |  |  |  |  |  |  |
|  |  |  |  |  |  |  |
|  |  |  |  |  |  |  |
|  |  |  |  |  |  |  |
|  |  |  |  |  |  |  |
|  |  |  |  |  |  |  |
|  |  |  |  |  |  |  |
|  |  |  |  |  |  |  |
|  |  |  |  |  |  |  |
|  |  |  |  |  |  |  |
|  |  |  |  |  |  |  |
|  |  |  |  |  |  |  |
|  |  |  |  |  |  |  |
|  |  |  |  |  |  |  |
|  |  |  |  |  |  |  |
|  |  |  |  |  |  |  |
|  |  |  |  |  |  |  |
|  |  |  |  |  |  |  |
|  |  |  |  |  |  |  |
|  |  |  |  |  |  |  |
|  |  |  |  |  |  |  |
|  |  |  |  |  |  |  |
|  |  |  |  |  |  |  |
|  |  |  |  |  |  |  |
|  |  |  |  |  |  |  |
|  |  |  |  |  |  |  |
|  |  |  |  |  |  |  |
|  |  |  |  |  |  |  |
|  |  |  |  |  |  |  |
|  |  |  |  |  |  |  |
|  |  |  |  |  |  |  |
|  |  |  |  |  |  |  |
|  |  |  |  |  |  |  |
|  |  |  |  |  |  |  |
|  |  |  |  |  |  |  |
|  |  |  |  |  |  |  |
|  |  |  |  |  |  |  |
|  |  |  |  |  |  |  |
|  |  |  |  |  |  |  |
|  |  |  |  |  |  |  |
|  |  |  |  |  |  |  |
|  |  |  |  |  |  |  |
|  |  |  |  |  |  |  |
|  |  |  |  |  |  |  |
|  |  |  |  |  |  |  |
|  |  |  |  |  |  |  |
|  |  |  |  |  |  |  |
|  |  |  |  |  |  |  |
|  |  |  |  |  |  |  |
|  |  |  |  |  |  |  |
|  |  |  |  |  |  |  |
|  |  |  |  |  |  |  |
|  |  |  |  |  |  |  |
|  |  |  |  |  |  |  |
|  |  |  |  |  |  |  |
|  |  |  |  |  |  |  |
|  |  |  |  |  |  |  |
|  |  |  |  |  |  |  |
|  |  |  |  |  |  |  |
|  |  |  |  |  |  |  |
|  |  |  |  |  |  |  |
|  |  |  |  |  |  |  |
|  |  |  |  |  |  |  |
|  |  |  |  |  |  |  |
|  |  |  |  |  |  |  |
|  |  |  |  |  |  |  |
|  |  |  |  |  |  |  |
|  |  |  |  |  |  |  |
|  |  |  |  |  |  |  |
|  |  |  |  |  |  |  |
|  |  |  |  |  |  |  |
|  |  |  |  |  |  |  |
|  |  |  |  |  |  |  |
|  |  |  |  |  |  |  |
|  |  |  |  |  |  |  |
|  |  |  |  |  |  |  |
|  |  |  |  |  |  |  |
|  |  |  |  |  |  |  |
|  |  |  |  |  |  |  |
|  |  |  |  |  |  |  |
|  |  |  |  |  |  |  |
|  |  |  |  |  |  |  |
|  |  |  |  |  |  |  |
|  |  |  |  |  |  |  |
|  |  |  |  |  |  |  |
|  |  |  |  |  |  |  |
|  |  |  |  |  |  |  |
|  |  |  |  |  |  |  |
|  |  |  |  |  |  |  |
|  |  |  |  |  |  |  |
|  |  |  |  |  |  |  |
|  |  |  |  |  |  |  |
|  |  |  |  |  |  |  |
|  |  |  |  |  |  |  |
|  |  |  |  |  |  |  |
|  |  |  |  |  |  |  |
|  |  |  |  |  |  |  |
|  |  |  |  |  |  |  |
|  |  |  |  |  |  |  |
|  |  |  |  |  |  |  |
|  |  |  |  |  |  |  |
|  |  |  |  |  |  |  |
|  |  |  |  |  |  |  |
|  |  |  |  |  |  |  |
|  |  |  |  |  |  |  |
|  |  |  |  |  |  |  |
|  |  |  |  |  |  |  |
|  |  |  |  |  |  |  |
|  |  |  |  |  |  |  |
|  |  |  |  |  |  |  |
|  |  |  |  |  |  |  |
|  |  |  |  |  |  |  |
|  |  |  |  |  |  |  |
|  |  |  |  |  |  |  |
|  |  |  |  |  |  |  |
|  |  |  |  |  |  |  |
|  |  |  |  |  |  |  |
|  |  |  |  |  |  |  |
|  |  |  |  |  |  |  |
|  |  |  |  |  |  |  |
|  |  |  |  |  |  |  |
|  |  |  |  |  |  |  |
|  |  |  |  |  |  |  |
|  |  |  |  |  |  |  |
|  |  |  |  |  |  |  |
|  |  |  |  |  |  |  |
|  |  |  |  |  |  |  |
|  |  |  |  |  |  |  |


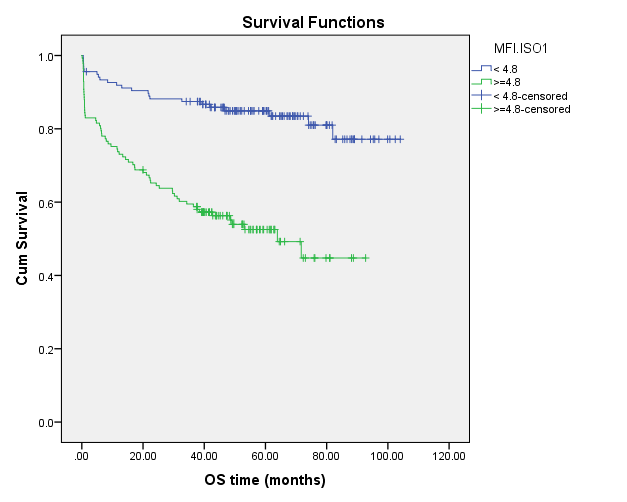


**Kaplan-Meier**

| **Case Processing Summary** | | | | |
| --- | --- | --- | --- | --- |
| MFI-ISO1 | Total N | N of Events | Censored | |
| N | Percent |
| < 60 | **136** | **18** | 118 | 86.8% |
| >=60 | **141** | **71** | 70 | 49.6% |
| Overall | 277 | 89 | 188 | 67.9% |

| **Medians for Survival Time** | | | | |
| --- | --- | --- | --- | --- |
| MFI-ISO1 | Median | | | |
| Estimate | Std. Error | 95% Confidence Interval | |
| Lower Bound | Upper Bound |
| < 60 | . | . | . | . |
| >=60 | 53.060 | 13.364 | 26.867 | 79.253 |
| Overall | . | . | . | . |

| **Overall Comparisons** | | | |
| --- | --- | --- | --- |
|  | Chi-Square | df | P-value |
| Log Rank (Mantel-Cox) | 47.611 | 1 | **<0.001** |
| MFI-ISO1. | | | |


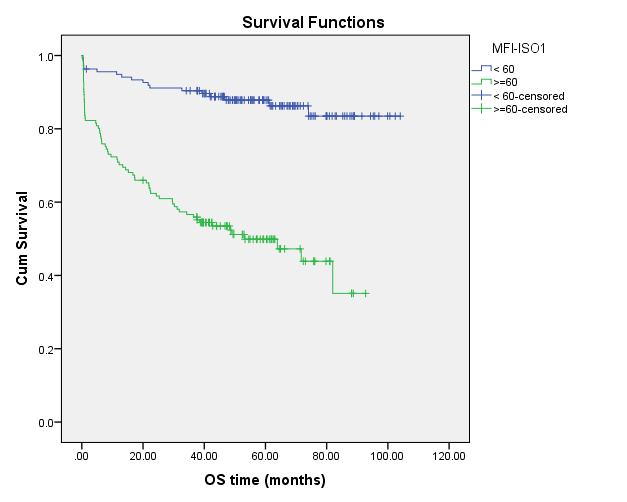


**Kaplan-Meier**

| **Case Processing Summary** | | | | |
| --- | --- | --- | --- | --- |
| Age.gps | Total N | N of Events | Censored | |
| N | Percent |
| < 5 years | **138** | **36** | 102 | 73.9% |
| 5-10 years | **109** | **30** | 79 | 72.5% |
| > 10 years | **84** | **34** | 50 | 59.5% |
| Overall | 331 | 100 | 231 | 69.8% |

|  | | | | | | | |
| --- | --- | --- | --- | --- | --- | --- | --- |
|  | |  |  |  | |  |  |
|  |  |
| < 5 years |  |  |  |  |  |  |  |
|  |  |  |  |  |  |  |
|  |  |  |  |  |  |  |
|  |  |  |  |  |  |  |
|  |  |  |  |  |  |  |
|  |  |  |  |  |  |  |
|  |  |  |  |  |  |  |
|  |  |  |  |  |  |  |
|  |  |  |  |  |  |  |
|  |  |  |  |  |  |  |
|  |  |  |  |  |  |  |
|  |  |  |  |  |  |  |
|  |  |  |  |  |  |  |
|  |  |  |  |  |  |  |
|  |  |  |  |  |  |  |
|  |  |  |  |  |  |  |
|  |  |  |  |  |  |  |
|  |  |  |  |  |  |  |
|  |  |  |  |  |  |  |
|  |  |  |  |  |  |  |
|  |  |  |  |  |  |  |
|  |  |  |  |  |  |  |
|  |  |  |  |  |  |  |
|  |  |  |  |  |  |  |
|  |  |  |  |  |  |  |
|  |  |  |  |  |  |  |
|  |  |  |  |  |  |  |
|  |  |  |  |  |  |  |
|  |  |  |  |  |  |  |
|  |  |  |  |  |  |  |
|  |  |  |  |  |  |  |
|  |  |  |  |  |  |  |
|  |  |  |  |  |  |  |
|  |  |  |  |  |  |  |
|  |  |  |  |  |  |  |
|  |  |  |  |  |  |  |
|  |  |  |  |  |  |  |
|  |  |  |  |  |  |  |
|  |  |  |  |  |  |  |
|  |  |  |  |  |  |  |
|  |  |  |  |  |  |  |
|  |  |  |  |  |  |  |
|  |  |  |  |  |  |  |
|  |  |  |  |  |  |  |
|  |  |  |  |  |  |  |
|  |  |  |  |  |  |  |
|  |  |  |  |  |  |  |
|  |  |  |  |  |  |  |
|  |  |  |  |  |  |  |
|  |  |  |  |  |  |  |
|  |  |  |  |  |  |  |
|  |  |  |  |  |  |  |
|  |  |  |  |  |  |  |
|  |  |  |  |  |  |  |
|  |  |  |  |  |  |  |
|  |  |  |  |  |  |  |
|  |  |  |  |  |  |  |
|  |  |  |  |  |  |  |
|  |  |  |  |  |  |  |
|  |  |  |  |  |  |  |
|  |  |  |  |  |  |  |
|  |  |  |  |  |  |  |
|  |  |  |  |  |  |  |
|  |  |  |  |  |  |  |
|  |  |  |  |  |  |  |
|  |  |  |  |  |  |  |
|  |  |  |  |  |  |  |
|  |  |  |  |  |  |  |
|  |  |  |  |  |  |  |
|  |  |  |  |  |  |  |
|  |  |  |  |  |  |  |
|  |  |  |  |  |  |  |
|  |  |  |  |  |  |  |
|  |  |  |  |  |  |  |
|  |  |  |  |  |  |  |
|  |  |  |  |  |  |  |
|  |  |  |  |  |  |  |
|  |  |  |  |  |  |  |
|  |  |  |  |  |  |  |
|  |  |  |  |  |  |  |
|  |  |  |  |  |  |  |
|  |  |  |  |  |  |  |
|  |  |  |  |  |  |  |
|  |  |  |  |  |  |  |
|  |  |  |  |  |  |  |
|  |  |  |  |  |  |  |
|  |  |  |  |  |  |  |
|  |  |  |  |  |  |  |
|  |  |  |  |  |  |  |
|  |  |  |  |  |  |  |
|  |  |  |  |  |  |  |
|  |  |  |  |  |  |  |
|  |  |  |  |  |  |  |
|  |  |  |  |  |  |  |
|  |  |  |  |  |  |  |
|  |  |  |  |  |  |  |
|  |  |  |  |  |  |  |
|  |  |  |  |  |  |  |
|  |  |  |  |  |  |  |
|  |  |  |  |  |  |  |
|  |  |  |  |  |  |  |
|  |  |  |  |  |  |  |
|  |  |  |  |  |  |  |
|  |  |  |  |  |  |  |
|  |  |  |  |  |  |  |
|  |  |  |  |  |  |  |
|  |  |  |  |  |  |  |
|  |  |  |  |  |  |  |
|  |  |  |  |  |  |  |
|  |  |  |  |  |  |  |
|  |  |  |  |  |  |  |
|  |  |  |  |  |  |  |
|  |  |  |  |  |  |  |
|  |  |  |  |  |  |  |
|  |  |  |  |  |  |  |
|  |  |  |  |  |  |  |
|  |  |  |  |  |  |  |
|  |  |  |  |  |  |  |
|  |  |  |  |  |  |  |
|  |  |  |  |  |  |  |
|  |  |  |  |  |  |  |
|  |  |  |  |  |  |  |
|  |  |  |  |  |  |  |
|  |  |  |  |  |  |  |
|  |  |  |  |  |  |  |
|  |  |  |  |  |  |  |
|  |  |  |  |  |  |  |
|  |  |  |  |  |  |  |
|  |  |  |  |  |  |  |
|  |  |  |  |  |  |  |
|  |  |  |  |  |  |  |
|  |  |  |  |  |  |  |
|  |  |  |  |  |  |  |
|  |  |  |  |  |  |  |
|  |  |  |  |  |  |  |
|  |  |  |  |  |  |  |
|  |  |  |  |  |  |  |
|  |  |  |  |  |  |  |
| 5-10 years |  |  |  |  |  |  |  |
|  |  |  |  |  |  |  |
|  |  |  |  |  |  |  |
|  |  |  |  |  |  |  |
|  |  |  |  |  |  |  |
|  |  |  |  |  |  |  |
|  |  |  |  |  |  |  |
|  |  |  |  |  |  |  |
|  |  |  |  |  |  |  |
|  |  |  |  |  |  |  |
|  |  |  |  |  |  |  |
|  |  |  |  |  |  |  |
|  |  |  |  |  |  |  |
|  |  |  |  |  |  |  |
|  |  |  |  |  |  |  |
|  |  |  |  |  |  |  |
|  |  |  |  |  |  |  |
|  |  |  |  |  |  |  |
|  |  |  |  |  |  |  |
|  |  |  |  |  |  |  |
|  |  |  |  |  |  |  |
|  |  |  |  |  |  |  |
|  |  |  |  |  |  |  |
|  |  |  |  |  |  |  |
|  |  |  |  |  |  |  |
|  |  |  |  |  |  |  |
|  |  |  |  |  |  |  |
|  |  |  |  |  |  |  |
|  |  |  |  |  |  |  |
|  |  |  |  |  |  |  |
|  |  |  |  |  |  |  |
|  |  |  |  |  |  |  |
|  |  |  |  |  |  |  |
|  |  |  |  |  |  |  |
|  |  |  |  |  |  |  |
|  |  |  |  |  |  |  |
|  |  |  |  |  |  |  |
|  |  |  |  |  |  |  |
|  |  |  |  |  |  |  |
|  |  |  |  |  |  |  |
|  |  |  |  |  |  |  |
|  |  |  |  |  |  |  |
|  |  |  |  |  |  |  |
|  |  |  |  |  |  |  |
|  |  |  |  |  |  |  |
|  |  |  |  |  |  |  |
|  |  |  |  |  |  |  |
|  |  |  |  |  |  |  |
|  |  |  |  |  |  |  |
|  |  |  |  |  |  |  |
|  |  |  |  |  |  |  |
|  |  |  |  |  |  |  |
|  |  |  |  |  |  |  |
|  |  |  |  |  |  |  |
|  |  |  |  |  |  |  |
|  |  |  |  |  |  |  |
|  |  |  |  |  |  |  |
|  |  |  |  |  |  |  |
|  |  |  |  |  |  |  |
|  |  |  |  |  |  |  |
|  |  |  |  |  |  |  |
|  |  |  |  |  |  |  |
|  |  |  |  |  |  |  |
|  |  |  |  |  |  |  |
|  |  |  |  |  |  |  |
|  |  |  |  |  |  |  |
|  |  |  |  |  |  |  |
|  |  |  |  |  |  |  |
|  |  |  |  |  |  |  |
|  |  |  |  |  |  |  |
|  |  |  |  |  |  |  |
|  |  |  |  |  |  |  |
|  |  |  |  |  |  |  |
|  |  |  |  |  |  |  |
|  |  |  |  |  |  |  |
|  |  |  |  |  |  |  |
|  |  |  |  |  |  |  |
|  |  |  |  |  |  |  |
|  |  |  |  |  |  |  |
|  |  |  |  |  |  |  |
|  |  |  |  |  |  |  |
|  |  |  |  |  |  |  |
|  |  |  |  |  |  |  |
|  |  |  |  |  |  |  |
|  |  |  |  |  |  |  |
|  |  |  |  |  |  |  |
|  |  |  |  |  |  |  |
|  |  |  |  |  |  |  |
|  |  |  |  |  |  |  |
|  |  |  |  |  |  |  |
|  |  |  |  |  |  |  |
|  |  |  |  |  |  |  |
|  |  |  |  |  |  |  |
|  |  |  |  |  |  |  |
|  |  |  |  |  |  |  |
|  |  |  |  |  |  |  |
|  |  |  |  |  |  |  |
|  |  |  |  |  |  |  |
|  |  |  |  |  |  |  |
|  |  |  |  |  |  |  |
|  |  |  |  |  |  |  |
|  |  |  |  |  |  |  |
|  |  |  |  |  |  |  |
|  |  |  |  |  |  |  |
|  |  |  |  |  |  |  |
|  |  |  |  |  |  |  |
|  |  |  |  |  |  |  |
|  |  |  |  |  |  |  |
|  |  |  |  |  |  |  |
| > 10 years |  |  |  |  |  |  |  |
|  |  |  |  |  |  |  |
|  |  |  |  |  |  |  |
|  |  |  |  |  |  |  |
|  |  |  |  |  |  |  |
|  |  |  |  |  |  |  |
|  |  |  |  |  |  |  |
|  |  |  |  |  |  |  |
|  |  |  |  |  |  |  |
|  |  |  |  |  |  |  |
|  |  |  |  |  |  |  |
|  |  |  |  |  |  |  |
|  |  |  |  |  |  |  |
|  |  |  |  |  |  |  |
|  |  |  |  |  |  |  |
|  |  |  |  |  |  |  |
|  |  |  |  |  |  |  |
|  |  |  |  |  |  |  |
|  |  |  |  |  |  |  |
|  |  |  |  |  |  |  |
|  |  |  |  |  |  |  |
|  |  |  |  |  |  |  |
|  |  |  |  |  |  |  |
|  |  |  |  |  |  |  |
|  |  |  |  |  |  |  |
|  |  |  |  |  |  |  |
|  |  |  |  |  |  |  |
|  |  |  |  |  |  |  |
|  |  |  |  |  |  |  |
|  |  |  |  |  |  |  |
|  |  |  |  |  |  |  |
|  |  |  |  |  |  |  |
|  |  |  |  |  |  |  |
|  |  |  |  |  |  |  |
|  |  |  |  |  |  |  |
|  |  |  |  |  |  |  |
|  |  |  |  |  |  |  |
|  |  |  |  |  |  |  |
|  |  |  |  |  |  |  |
|  |  |  |  |  |  |  |
|  |  |  |  |  |  |  |
|  |  |  |  |  |  |  |
|  |  |  |  |  |  |  |
|  |  |  |  |  |  |  |
|  |  |  |  |  |  |  |
|  |  |  |  |  |  |  |
|  |  |  |  |  |  |  |
|  |  |  |  |  |  |  |
|  |  |  |  |  |  |  |
|  |  |  |  |  |  |  |
|  |  |  |  |  |  |  |
|  |  |  |  |  |  |  |
|  |  |  |  |  |  |  |
|  |  |  |  |  |  |  |
|  |  |  |  |  |  |  |
|  |  |  |  |  |  |  |
|  |  |  |  |  |  |  |
|  |  |  |  |  |  |  |
|  |  |  |  |  |  |  |
|  |  |  |  |  |  |  |
|  |  |  |  |  |  |  |
|  |  |  |  |  |  |  |
|  |  |  |  |  |  |  |
|  |  |  |  |  |  |  |
|  |  |  |  |  |  |  |
|  |  |  |  |  |  |  |
|  |  |  |  |  |  |  |
|  |  |  |  |  |  |  |
|  |  |  |  |  |  |  |
|  |  |  |  |  |  |  |
|  |  |  |  |  |  |  |
|  |  |  |  |  |  |  |
|  |  |  |  |  |  |  |
|  |  |  |  |  |  |  |
|  |  |  |  |  |  |  |
|  |  |  |  |  |  |  |
|  |  |  |  |  |  |  |
|  |  |  |  |  |  |  |
|  |  |  |  |  |  |  |
|  |  |  |  |  |  |  |
|  |  |  |  |  |  |  |
|  |  |  |  |  |  |  |
|  |  |  |  |  |  |  |
|  |  |  |  |  |  |  |

| **Medians for Survival Time** | | | | |
| --- | --- | --- | --- | --- |
| Age.gps | Median | | | |
| Estimate | Std. Error | 95% Confidence Interval | |
| Lower Bound | Upper Bound |
| < 5 years | . | . | . | . |
| 5-10 years | . | . | . | . |
| > 10 years | . | . | . | . |
| Overall | . | . | . | . |

| **Overall Comparisons** | | | |
| --- | --- | --- | --- |
|  | Chi-Square | df | P-value |
| Log Rank (Mantel-Cox) | 5.989 | 2 | **.050** |
| Age.gps. | | | |


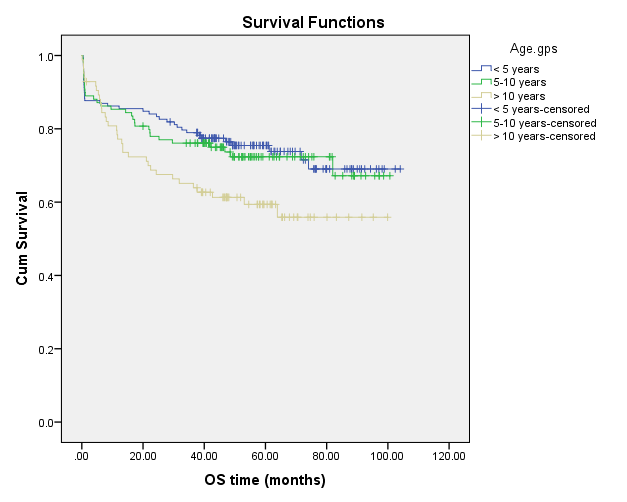


**Kaplan-Meier**

| **Case Processing Summary** | | | | |
| --- | --- | --- | --- | --- |
| Age.gps1 | Total N | N of Events | Censored | |
| N | Percent |
| =< 10 years | **247** | **66** | 181 | 73.3% |
| > 10 years | **84** | **34** | 50 | 59.5% |
| Overall | 331 | 100 | 231 | 69.8% |

| **Medians for Survival Time** | | | | |
| --- | --- | --- | --- | --- |
| Age.gps1 | Median | | | |
| Estimate | Std. Error | 95% Confidence Interval | |
| Lower Bound | Upper Bound |
| =< 10 years | . | . | . | . |
| > 10 years | . | . | . | . |
| Overall | . | . | . | . |

| **Overall Comparisons** | | | |
| --- | --- | --- | --- |
|  | Chi-Square | df | P-value |
| Log Rank (Mantel-Cox) | 5.896 | 1 | **.015** |
| Age.gps1. | | | |


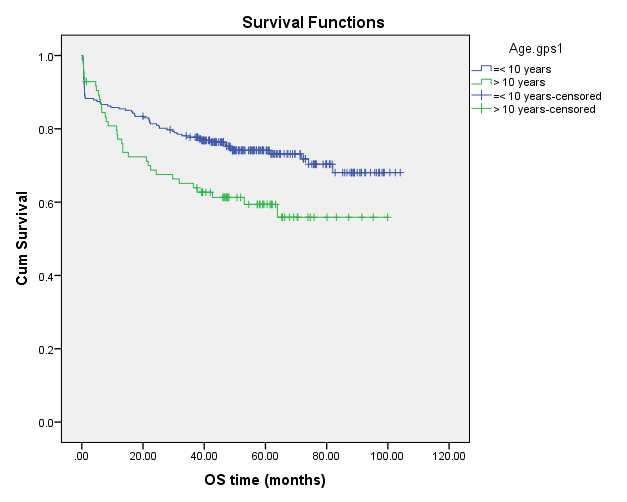


**Kaplan-Meier**

| **Case Processing Summary** | | | | |
| --- | --- | --- | --- | --- |
| 6. Gender | Total N | N of Events | Censored | |
| N | Percent |
| Male | **180** | **51** | 129 | 71.7% |
| Female | **151** | **49** | 102 | 67.5% |
| Overall | 331 | 100 | 231 | 69.8% |

| **Survival Table** | | | | | | | |
| --- | --- | --- | --- | --- | --- | --- | --- |
| 6. Gender | | Time | Status | Cumulative Proportion Surviving at the Time | | N of Cumulative Events | N of Remaining Cases |
| Estimate | Std. Error |
| Male | 1 | .100 | Died | .994 | .006 | 1 | 179 |
| 2 | .330 | Died | .989 | .008 | 2 | 178 |
| 3 | .460 | Died | . | . | 3 | 177 |
| 4 | .460 | Died | .978 | .011 | 4 | 176 |
| 5 | .530 | Died | .972 | .012 | 5 | 175 |
| 6 | .560 | Died | .967 | .013 | 6 | 174 |
| 7 | .630 | Died | . | . | 7 | 173 |
| 8 | .630 | Died | .956 | .015 | 8 | 172 |
| 9 | .690 | Died | .950 | .016 | 9 | 171 |
| 10 | .760 | Died | .944 | .017 | 10 | 170 |
| 11 | .790 | Died | .939 | .018 | 11 | 169 |
| 12 | .860 | Died | .933 | .019 | 12 | 168 |
| 13 | .890 | Died | . | . | 13 | 167 |
| 14 | .890 | Died | .922 | .020 | 14 | 166 |
| 15 | .920 | Died | .917 | .021 | 15 | 165 |
| 16 | 1.020 | Died | .911 | .021 | 16 | 164 |
| 17 | 1.120 | Died | .906 | .022 | 17 | 163 |
| 18 | 1.480 | Alive | . | . | 17 | 162 |
| 19 | 3.850 | Died | .900 | .022 | 18 | 161 |
| 20 | 4.570 | Died | .894 | .023 | 19 | 160 |
| 21 | 4.740 | Died | .889 | .023 | 20 | 159 |
| 22 | 4.970 | Died | .883 | .024 | 21 | 158 |
| 23 | 6.120 | Died | .878 | .024 | 22 | 157 |
| 24 | 6.250 | Died | .872 | .025 | 23 | 156 |
| 25 | 6.410 | Died | .866 | .025 | 24 | 155 |
| 26 | 7.990 | Died | .861 | .026 | 25 | 154 |
| 27 | 8.420 | Died | .855 | .026 | 26 | 153 |
| 28 | 8.590 | Died | .850 | .027 | 27 | 152 |
| 29 | 9.540 | Died | .844 | .027 | 28 | 151 |
| 30 | 11.510 | Died | .838 | .027 | 29 | 150 |
| 31 | 13.390 | Died | . | . | 30 | 149 |
| 32 | 13.390 | Died | .827 | .028 | 31 | 148 |
| 33 | 15.230 | Died | .822 | .029 | 32 | 147 |
| 34 | 16.280 | Died | .816 | .029 | 33 | 146 |
| 35 | 16.680 | Died | .811 | .029 | 34 | 145 |
| 36 | 17.240 | Died | .805 | .030 | 35 | 144 |
| 37 | 19.970 | Alive | . | . | 35 | 143 |
| 38 | 20.000 | Died | .799 | .030 | 36 | 142 |
| 39 | 21.090 | Died | .794 | .030 | 37 | 141 |
| 40 | 22.240 | Died | .788 | .031 | 38 | 140 |
| 41 | 25.300 | Died | .782 | .031 | 39 | 139 |
| 42 | 27.830 | Died | .777 | .031 | 40 | 138 |
| 43 | 29.670 | Died | .771 | .031 | 41 | 137 |
| 44 | 31.150 | Died | .766 | .032 | 42 | 136 |
| 45 | 31.840 | Died | .760 | .032 | 43 | 135 |
| 46 | 32.700 | Died | .754 | .032 | 44 | 134 |
| 47 | 34.140 | Alive | . | . | 44 | 133 |
| 48 | 35.390 | Alive | . | . | 44 | 132 |
| 49 | 37.600 | Alive | . | . | 44 | 131 |
| 50 | 37.760 | Alive | . | . | 44 | 130 |
| 51 | 37.830 | Alive | . | . | 44 | 129 |
| 52 | 37.860 | Alive | . | . | 44 | 128 |
| 53 | 38.390 | Died | .748 | .032 | 45 | 127 |
| 54 | 38.390 | Alive | . | . | 45 | 126 |
| 55 | 38.750 | Alive | . | . | 45 | 125 |
| 56 | 39.210 | Alive | . | . | 45 | 124 |
| 57 | 39.210 | Alive | . | . | 45 | 123 |
| 58 | 39.570 | Alive | . | . | 45 | 122 |
| 59 | 39.700 | Alive | . | . | 45 | 121 |
| 60 | 39.740 | Alive | . | . | 45 | 120 |
| 61 | 39.800 | Alive | . | . | 45 | 119 |
| 62 | 39.970 | Alive | . | . | 45 | 118 |
| 63 | 40.430 | Alive | . | . | 45 | 117 |
| 64 | 40.660 | Alive | . | . | 45 | 116 |
| 65 | 41.380 | Alive | . | . | 45 | 115 |
| 66 | 41.680 | Alive | . | . | 45 | 114 |
| 67 | 41.710 | Alive | . | . | 45 | 113 |
| 68 | 41.970 | Alive | . | . | 45 | 112 |
| 69 | 42.430 | Alive | . | . | 45 | 111 |
| 70 | 42.760 | Alive | . | . | 45 | 110 |
| 71 | 43.130 | Alive | . | . | 45 | 109 |
| 72 | 43.420 | Alive | . | . | 45 | 108 |
| 73 | 43.490 | Alive | . | . | 45 | 107 |
| 74 | 43.590 | Alive | . | . | 45 | 106 |
| 75 | 43.650 | Alive | . | . | 45 | 105 |
| 76 | 44.080 | Alive | . | . | 45 | 104 |
| 77 | 45.230 | Alive | . | . | 45 | 103 |
| 78 | 45.590 | Alive | . | . | 45 | 102 |
| 79 | 46.280 | Alive | . | . | 45 | 101 |
| 80 | 46.780 | Alive | . | . | 45 | 100 |
| 81 | 46.910 | Died | .741 | .033 | 46 | 99 |
| 82 | 47.270 | Alive | . | . | 46 | 98 |
| 83 | 47.300 | Alive | . | . | 46 | 97 |
| 84 | 47.500 | Alive | . | . | 46 | 96 |
| 85 | 47.760 | Alive | . | . | 46 | 95 |
| 86 | 47.830 | Alive | . | . | 46 | 94 |
| 87 | 48.030 | Alive | . | . | 46 | 93 |
| 88 | 49.010 | Died | **.733** | .034 | 47 | 92 |
| 89 | 49.240 | Alive | . | . | 47 | 91 |
| 90 | 49.670 | Alive | . | . | 47 | 90 |
| 91 | 49.800 | Alive | . | . | 47 | 89 |
| 92 | 49.930 | Alive | . | . | 47 | 88 |
| 93 | 50.000 | Alive | . | . | 47 | 87 |
| 94 | 50.430 | Alive | . | . | 47 | 86 |
| 95 | 50.630 | Alive | . | . | 47 | 85 |
| 96 | 50.720 | Alive | . | . | 47 | 84 |
| 97 | 51.280 | Alive | . | . | 47 | 83 |
| 98 | 51.410 | Alive | . | . | 47 | 82 |
| 99 | 51.880 | Alive | . | . | 47 | 81 |
| 100 | 52.300 | Alive | . | . | 47 | 80 |
| 101 | 52.430 | Alive | . | . | 47 | 79 |
| 102 | 52.990 | Alive | . | . | 47 | 78 |
| 103 | 53.320 | Alive | . | . | 47 | 77 |
| 104 | 54.930 | Alive | . | . | 47 | 76 |
| 105 | 55.920 | Alive | . | . | 47 | 75 |
| 106 | 55.920 | Alive | . | . | 47 | 74 |
| 107 | 55.990 | Alive | . | . | 47 | 73 |
| 108 | 56.020 | Alive | . | . | 47 | 72 |
| 109 | 57.070 | Alive | . | . | 47 | 71 |
| 110 | 57.270 | Alive | . | . | 47 | 70 |
| 111 | 57.930 | Alive | . | . | 47 | 69 |
| 112 | 58.060 | Alive | . | . | 47 | 68 |
| 113 | 58.260 | Alive | . | . | 47 | 67 |
| 114 | 58.590 | Alive | . | . | 47 | 66 |
| 115 | 59.050 | Alive | . | . | 47 | 65 |
| 116 | 59.140 | Alive | . | . | 47 | 64 |
| 117 | 59.240 | Alive | . | . | 47 | 63 |
| 118 | 59.240 | Alive | . | . | 47 | 62 |
| 119 | 59.410 | Alive | . | . | 47 | 61 |
| 120 | 59.510 | Alive | . | . | 47 | 60 |
| 121 | 60.360 | Alive | . | . | 47 | 59 |
| 122 | 61.250 | Died | .721 | .035 | 48 | 58 |
| 123 | 61.510 | Alive | . | . | 48 | 57 |
| 124 | 61.840 | Alive | . | . | 48 | 56 |
| 125 | 61.840 | Alive | . | . | 48 | 55 |
| 126 | 62.140 | Alive | . | . | 48 | 54 |
| 127 | 62.400 | Alive | . | . | 48 | 53 |
| 128 | 62.800 | Alive | . | . | 48 | 52 |
| 129 | 62.800 | Alive | . | . | 48 | 51 |
| 130 | 63.320 | Alive | . | . | 48 | 50 |
| 131 | 63.850 | Alive | . | . | 48 | 49 |
| 132 | 63.910 | Died | .706 | .037 | 49 | 48 |
| 133 | 64.640 | Alive | . | . | 49 | 47 |
| 134 | 65.330 | Alive | . | . | 49 | 46 |
| 135 | 65.560 | Alive | . | . | 49 | 45 |
| 136 | 66.280 | Alive | . | . | 49 | 44 |
| 137 | 67.040 | Alive | . | . | 49 | 43 |
| 138 | 67.340 | Alive | . | . | 49 | 42 |
| 139 | 68.850 | Alive | . | . | 49 | 41 |
| 140 | 68.850 | Alive | . | . | 49 | 40 |
| 141 | 69.240 | Alive | . | . | 49 | 39 |
| 142 | 69.570 | Alive | . | . | 49 | 38 |
| 143 | 69.700 | Alive | . | . | 49 | 37 |
| 144 | 70.590 | Alive | . | . | 49 | 36 |
| 145 | 71.320 | Alive | . | . | 49 | 35 |
| 146 | 72.340 | Alive | . | . | 49 | 34 |
| 147 | 72.370 | Alive | . | . | 49 | 33 |
| 148 | 74.080 | Died | .684 | .042 | 50 | 32 |
| 149 | 74.110 | Alive | . | . | 50 | 31 |
| 150 | 74.640 | Alive | . | . | 50 | 30 |
| 151 | 75.160 | Alive | . | . | 50 | 29 |
| 152 | 75.820 | Alive | . | . | 50 | 28 |
| 153 | 76.640 | Alive | . | . | 50 | 27 |
| 154 | 79.840 | Alive | . | . | 50 | 26 |
| 155 | 79.870 | Alive | . | . | 50 | 25 |
| 156 | 80.000 | Alive | . | . | 50 | 24 |
| 157 | 80.950 | Alive | . | . | 50 | 23 |
| 158 | 81.090 | Alive | . | . | 50 | 22 |
| 159 | 81.780 | Alive | . | . | 50 | 21 |
| 160 | 81.970 | Died | .652 | .051 | 51 | 20 |
| 161 | 82.760 | Alive | . | . | 51 | 19 |
| 162 | 83.160 | Alive | . | . | 51 | 18 |
| 163 | 86.640 | Alive | . | . | 51 | 17 |
| 164 | 87.200 | Alive | . | . | 51 | 16 |
| 165 | 87.630 | Alive | . | . | 51 | 15 |
| 166 | 88.130 | Alive | . | . | 51 | 14 |
| 167 | 88.190 | Alive | . | . | 51 | 13 |
| 168 | 88.220 | Alive | . | . | 51 | 12 |
| 169 | 88.720 | Alive | . | . | 51 | 11 |
| 170 | 89.050 | Alive | . | . | 51 | 10 |
| 171 | 89.080 | Alive | . | . | 51 | 9 |
| 172 | 90.820 | Alive | . | . | 51 | 8 |
| 173 | 92.730 | Alive | . | . | 51 | 7 |
| 174 | 94.340 | Alive | . | . | 51 | 6 |
| 175 | 97.040 | Alive | . | . | 51 | 5 |
| 176 | 98.130 | Alive | . | . | 51 | 4 |
| 177 | 98.820 | Alive | . | . | 51 | 3 |
| 178 | 100.660 | Alive | . | . | 51 | 2 |
| 179 | 102.400 | Alive | . | . | 51 | 1 |
| 180 | 104.050 | Alive | . | . | 51 | 0 |
| Female | 1 | .390 | Died | .993 | .007 | 1 | 150 |
| 2 | .460 | Died | .987 | .009 | 2 | 149 |
| 3 | .490 | Died | . | . | 3 | 148 |
| 4 | .490 | Died | .974 | .013 | 4 | 147 |
| 5 | .560 | Died | . | . | 5 | 146 |
| 6 | .560 | Died | . | . | 6 | 145 |
| 7 | .560 | Died | .954 | .017 | 7 | 144 |
| 8 | .590 | Died | .947 | .018 | 8 | 143 |
| 9 | .630 | Died | . | . | 9 | 142 |
| 10 | .630 | Died | . | . | 10 | 141 |
| 11 | .630 | Died | .927 | .021 | 11 | 140 |
| 12 | .720 | Died | . | . | 12 | 139 |
| 13 | .720 | Died | .914 | .023 | 13 | 138 |
| 14 | .760 | Died | .907 | .024 | 14 | 137 |
| 15 | .790 | Died | .901 | .024 | 15 | 136 |
| 16 | .820 | Died | .894 | .025 | 16 | 135 |
| 17 | .950 | Died | . | . | 17 | 134 |
| 18 | .950 | Died | .881 | .026 | 18 | 133 |
| 19 | 5.390 | Died | .874 | .027 | 19 | 132 |
| 20 | 5.760 | Died | .868 | .028 | 20 | 131 |
| 21 | 5.890 | Died | .861 | .028 | 21 | 130 |
| 22 | 6.510 | Died | .854 | .029 | 22 | 129 |
| 23 | 7.660 | Died | .848 | .029 | 23 | 128 |
| 24 | 11.380 | Died | .841 | .030 | 24 | 127 |
| 25 | 11.680 | Died | .834 | .030 | 25 | 126 |
| 26 | 12.200 | Died | .828 | .031 | 26 | 125 |
| 27 | 13.060 | Died | .821 | .031 | 27 | 124 |
| 28 | 14.310 | Died | .815 | .032 | 28 | 123 |
| 29 | 17.340 | Died | .808 | .032 | 29 | 122 |
| 30 | 21.680 | Died | .801 | .032 | 30 | 121 |
| 31 | 21.910 | Died | .795 | .033 | 31 | 120 |
| 32 | 21.970 | Died | .788 | .033 | 32 | 119 |
| 33 | 22.300 | Died | .781 | .034 | 33 | 118 |
| 34 | 22.470 | Died | .775 | .034 | 34 | 117 |
| 35 | 24.310 | Died | .768 | .034 | 35 | 116 |
| 36 | 24.410 | Died | .762 | .035 | 36 | 115 |
| 37 | 25.200 | Died | .755 | .035 | 37 | 114 |
| 38 | 28.850 | Alive | . | . | 37 | 113 |
| 39 | 29.570 | Died | .748 | .035 | 38 | 112 |
| 40 | 30.230 | Died | .742 | .036 | 39 | 111 |
| 41 | 34.280 | Died | .735 | .036 | 40 | 110 |
| 42 | 36.450 | Died | .728 | .036 | 41 | 109 |
| 43 | 37.010 | Alive | . | . | 41 | 108 |
| 44 | 37.600 | Alive | . | . | 41 | 107 |
| 45 | 37.630 | Alive | . | . | 41 | 106 |
| 46 | 37.660 | Died | .721 | .037 | 42 | 105 |
| 47 | 37.660 | Alive | . | . | 42 | 104 |
| 48 | 39.050 | Alive | . | . | 42 | 103 |
| 49 | 39.210 | Died | .714 | .037 | 43 | 102 |
| 50 | 39.240 | Alive | . | . | 43 | 101 |
| 51 | 39.340 | Alive | . | . | 43 | 100 |
| 52 | 39.510 | Alive | . | . | 43 | 99 |
| 53 | 39.570 | Alive | . | . | 43 | 98 |
| 54 | 40.200 | Alive | . | . | 43 | 97 |
| 55 | 40.490 | Alive | . | . | 43 | 96 |
| 56 | 40.590 | Alive | . | . | 43 | 95 |
| 57 | 41.680 | Alive | . | . | 43 | 94 |
| 58 | 41.740 | Alive | . | . | 43 | 93 |
| 59 | 41.970 | Died | .707 | .037 | 44 | 92 |
| 60 | 42.270 | Alive | . | . | 44 | 91 |
| 61 | 42.500 | Alive | . | . | 44 | 90 |
| 62 | 42.700 | Died | .699 | .038 | 45 | 89 |
| 63 | 43.390 | Alive | . | . | 45 | 88 |
| 64 | 43.980 | Alive | . | . | 45 | 87 |
| 65 | 44.740 | Alive | . | . | 45 | 86 |
| 66 | 45.430 | Alive | . | . | 45 | 85 |
| 67 | 45.790 | Alive | . | . | 45 | 84 |
| 68 | 46.050 | Alive | . | . | 45 | 83 |
| 69 | 46.120 | Alive | . | . | 45 | 82 |
| 70 | 46.180 | Alive | . | . | 45 | 81 |
| 71 | 46.280 | Alive | . | . | 45 | 80 |
| 72 | 46.580 | Alive | . | . | 45 | 79 |
| 73 | 46.740 | Died | .690 | .038 | 46 | 78 |
| 74 | 47.170 | Alive | . | . | 46 | 77 |
| 75 | 47.300 | Alive | . | . | 46 | 76 |
| 76 | 48.190 | Alive | . | . | 46 | 75 |
| 77 | 48.450 | Alive | . | . | 46 | 74 |
| 78 | 48.550 | Died | .681 | .039 | 47 | 73 |
| 79 | 48.650 | Alive | . | . | 47 | 72 |
| 80 | 49.180 | Alive | . | . | 47 | 71 |
| 81 | 49.280 | Alive | . | . | 47 | 70 |
| 82 | 49.310 | Alive | . | . | 47 | 69 |
| 83 | 49.410 | Alive | . | . | 47 | 68 |
| 84 | 49.840 | Alive | . | . | 47 | 67 |
| 85 | 50.260 | Alive | . | . | 47 | 66 |
| 86 | 51.220 | Alive | . | . | 47 | 65 |
| 87 | 51.320 | Alive | . | . | 47 | 64 |
| 88 | 52.040 | Alive | . | . | 47 | 63 |
| 89 | 52.270 | Alive | . | . | 47 | 62 |
| 90 | 52.570 | Alive | . | . | 47 | 61 |
| 91 | 53.060 | Died | **.670** | .040 | 48 | 60 |
| 92 | 53.090 | Alive | . | . | 48 | 59 |
| 93 | 54.440 | Alive | . | . | 48 | 58 |
| 94 | 54.540 | Alive | . | . | 48 | 57 |
| 95 | 55.100 | Alive | . | . | 48 | 56 |
| 96 | 55.130 | Alive | . | . | 48 | 55 |
| 97 | 55.200 | Alive | . | . | 48 | 54 |
| 98 | 55.530 | Alive | . | . | 48 | 53 |
| 99 | 56.280 | Alive | . | . | 48 | 52 |
| 100 | 56.510 | Alive | . | . | 48 | 51 |
| 101 | 57.040 | Alive | . | . | 48 | 50 |
| 102 | 57.430 | Alive | . | . | 48 | 49 |
| 103 | 57.700 | Alive | . | . | 48 | 48 |
| 104 | 57.800 | Alive | . | . | 48 | 47 |
| 105 | 58.290 | Alive | . | . | 48 | 46 |
| 106 | 59.110 | Alive | . | . | 48 | 45 |
| 107 | 60.200 | Alive | . | . | 48 | 44 |
| 108 | 60.530 | Alive | . | . | 48 | 43 |
| 109 | 60.790 | Alive | . | . | 48 | 42 |
| 110 | 61.020 | Alive | . | . | 48 | 41 |
| 111 | 61.220 | Alive | . | . | 48 | 40 |
| 112 | 61.840 | Alive | . | . | 48 | 39 |
| 113 | 62.140 | Alive | . | . | 48 | 38 |
| 114 | 63.060 | Alive | . | . | 48 | 37 |
| 115 | 63.590 | Alive | . | . | 48 | 36 |
| 116 | 64.510 | Alive | . | . | 48 | 35 |
| 117 | 64.800 | Alive | . | . | 48 | 34 |
| 118 | 64.900 | Alive | . | . | 48 | 33 |
| 119 | 66.090 | Alive | . | . | 48 | 32 |
| 120 | 67.830 | Alive | . | . | 48 | 31 |
| 121 | 68.090 | Alive | . | . | 48 | 30 |
| 122 | 70.390 | Alive | . | . | 48 | 29 |
| 123 | 71.380 | Alive | . | . | 48 | 28 |
| 124 | 71.710 | Died | .646 | .045 | 49 | 27 |
| 125 | 73.030 | Alive | . | . | 49 | 26 |
| 126 | 73.060 | Alive | . | . | 49 | 25 |
| 127 | 73.910 | Alive | . | . | 49 | 24 |
| 128 | 75.720 | Alive | . | . | 49 | 23 |
| 129 | 75.920 | Alive | . | . | 49 | 22 |
| 130 | 76.150 | Alive | . | . | 49 | 21 |
| 131 | 76.250 | Alive | . | . | 49 | 20 |
| 132 | 76.450 | Alive | . | . | 49 | 19 |
| 133 | 78.850 | Alive | . | . | 49 | 18 |
| 134 | 79.800 | Alive | . | . | 49 | 17 |
| 135 | 80.100 | Alive | . | . | 49 | 16 |
| 136 | 80.890 | Alive | . | . | 49 | 15 |
| 137 | 85.260 | Alive | . | . | 49 | 14 |
| 138 | 85.890 | Alive | . | . | 49 | 13 |
| 139 | 88.720 | Alive | . | . | 49 | 12 |
| 140 | 90.000 | Alive | . | . | 49 | 11 |
| 141 | 91.220 | Alive | . | . | 49 | 10 |
| 142 | 91.380 | Alive | . | . | 49 | 9 |
| 143 | 91.510 | Alive | . | . | 49 | 8 |
| 144 | 92.430 | Alive | . | . | 49 | 7 |
| 145 | 95.230 | Alive | . | . | 49 | 6 |
| 146 | 95.720 | Alive | . | . | 49 | 5 |
| 147 | 96.250 | Alive | . | . | 49 | 4 |
| 148 | 97.140 | Alive | . | . | 49 | 3 |
| 149 | 97.170 | Alive | . | . | 49 | 2 |
| 150 | 98.590 | Alive | . | . | 49 | 1 |
| 151 | 99.900 | Alive | . | . | 49 | 0 |

| **Medians for Survival Time** | | | | |
| --- | --- | --- | --- | --- |
| 6. Gender | Median | | | |
| Estimate | Std. Error | 95% Confidence Interval | |
| Lower Bound | Upper Bound |
| Male | . | . | . | . |
| Female | . | . | . | . |
| Overall | . | . | . | . |

| **Overall Comparisons** | | | |
| --- | --- | --- | --- |
|  | Chi-Square | df | P-value |
| Log Rank (Mantel-Cox) | .613 | 1 | .434 |
| 6. Gender. | | | |


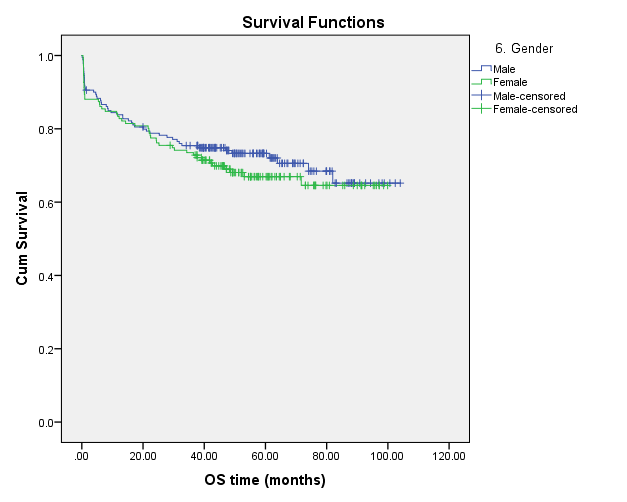


**Kaplan-Meier**

| **Case Processing Summary** | | | | |
| --- | --- | --- | --- | --- |
| BM.Blasts | Total N | N of Events | Censored | |
| N | Percent |
| < 90% | **139** | **44** | 95 | 68.3% |
| >=90% | **192** | **56** | 136 | 70.8% |
| Overall | 331 | 100 | 231 | 69.8% |

| **Survival Table** | | | | | | | |
| --- | --- | --- | --- | --- | --- | --- | --- |
| BM.Blasts | | Time | Status | Cumulative Proportion Surviving at the Time | | N of Cumulative Events | N of Remaining Cases |
| Estimate | Std. Error |
| < 90% | 1 | .100 | Died | .993 | .007 | 1 | 138 |
| 2 | .460 | Died | . | . | 2 | 137 |
| 3 | .460 | Died | .978 | .012 | 3 | 136 |
| 4 | .630 | Died | . | . | 4 | 135 |
| 5 | .630 | Died | . | . | 5 | 134 |
| 6 | .630 | Died | . | . | 6 | 133 |
| 7 | .630 | Died | .950 | .019 | 7 | 132 |
| 8 | .720 | Died | .942 | .020 | 8 | 131 |
| 9 | .760 | Died | .935 | .021 | 9 | 130 |
| 10 | .790 | Died | .928 | .022 | 10 | 129 |
| 11 | .890 | Died | .921 | .023 | 11 | 128 |
| 12 | .920 | Died | .914 | .024 | 12 | 127 |
| 13 | .950 | Died | .906 | .025 | 13 | 126 |
| 14 | 1.020 | Died | .899 | .026 | 14 | 125 |
| 15 | 5.760 | Died | .892 | .026 | 15 | 124 |
| 16 | 5.890 | Died | .885 | .027 | 16 | 123 |
| 17 | 6.250 | Died | .878 | .028 | 17 | 122 |
| 18 | 6.410 | Died | .871 | .028 | 18 | 121 |
| 19 | 7.660 | Died | .863 | .029 | 19 | 120 |
| 20 | 7.990 | Died | .856 | .030 | 20 | 119 |
| 21 | 8.420 | Died | .849 | .030 | 21 | 118 |
| 22 | 11.680 | Died | .842 | .031 | 22 | 117 |
| 23 | 13.060 | Died | .835 | .032 | 23 | 116 |
| 24 | 13.390 | Died | . | . | 24 | 115 |
| 25 | 13.390 | Died | .820 | .033 | 25 | 114 |
| 26 | 16.280 | Died | .813 | .033 | 26 | 113 |
| 27 | 16.680 | Died | .806 | .034 | 27 | 112 |
| 28 | 17.240 | Died | .799 | .034 | 28 | 111 |
| 29 | 17.340 | Died | .791 | .034 | 29 | 110 |
| 30 | 19.970 | Alive | . | . | 29 | 109 |
| 31 | 20.000 | Died | .784 | .035 | 30 | 108 |
| 32 | 21.970 | Died | .777 | .035 | 31 | 107 |
| 33 | 22.240 | Died | .770 | .036 | 32 | 106 |
| 34 | 22.300 | Died | .762 | .036 | 33 | 105 |
| 35 | 22.470 | Died | .755 | .037 | 34 | 104 |
| 36 | 24.310 | Died | .748 | .037 | 35 | 103 |
| 37 | 25.200 | Died | .741 | .037 | 36 | 102 |
| 38 | 27.830 | Died | .733 | .038 | 37 | 101 |
| 39 | 29.670 | Died | .726 | .038 | 38 | 100 |
| 40 | 30.230 | Died | .719 | .038 | 39 | 99 |
| 41 | 31.150 | Died | .712 | .038 | 40 | 98 |
| 42 | 34.140 | Alive | . | . | 40 | 97 |
| 43 | 36.450 | Died | .704 | .039 | 41 | 96 |
| 44 | 37.600 | Alive | . | . | 41 | 95 |
| 45 | 37.660 | Died | .697 | .039 | 42 | 94 |
| 46 | 37.660 | Alive | . | . | 42 | 93 |
| 47 | 37.830 | Alive | . | . | 42 | 92 |
| 48 | 39.210 | Died | **.689** | .039 | 43 | 91 |
| 49 | 39.240 | Alive | . | . | 43 | 90 |
| 50 | 39.570 | Alive | . | . | 43 | 89 |
| 51 | 39.800 | Alive | . | . | 43 | 88 |
| 52 | 40.490 | Alive | . | . | 43 | 87 |
| 53 | 40.590 | Alive | . | . | 43 | 86 |
| 54 | 41.680 | Alive | . | . | 43 | 85 |
| 55 | 41.740 | Alive | . | . | 43 | 84 |
| 56 | 41.970 | Alive | . | . | 43 | 83 |
| 57 | 42.500 | Alive | . | . | 43 | 82 |
| 58 | 43.130 | Alive | . | . | 43 | 81 |
| 59 | 43.390 | Alive | . | . | 43 | 80 |
| 60 | 43.490 | Alive | . | . | 43 | 79 |
| 61 | 43.650 | Alive | . | . | 43 | 78 |
| 62 | 43.980 | Alive | . | . | 43 | 77 |
| 63 | 44.080 | Alive | . | . | 43 | 76 |
| 64 | 45.230 | Alive | . | . | 43 | 75 |
| 65 | 45.590 | Alive | . | . | 43 | 74 |
| 66 | 46.180 | Alive | . | . | 43 | 73 |
| 67 | 46.580 | Alive | . | . | 43 | 72 |
| 68 | 46.780 | Alive | . | . | 43 | 71 |
| 69 | 47.170 | Alive | . | . | 43 | 70 |
| 70 | 47.270 | Alive | . | . | 43 | 69 |
| 71 | 47.300 | Alive | . | . | 43 | 68 |
| 72 | 47.500 | Alive | . | . | 43 | 67 |
| 73 | 47.760 | Alive | . | . | 43 | 66 |
| 74 | 47.830 | Alive | . | . | 43 | 65 |
| 75 | 48.450 | Alive | . | . | 43 | 64 |
| 76 | 49.310 | Alive | . | . | 43 | 63 |
| 77 | 49.670 | Alive | . | . | 43 | 62 |
| 78 | 49.840 | Alive | . | . | 43 | 61 |
| 79 | 50.000 | Alive | . | . | 43 | 60 |
| 80 | 50.430 | Alive | . | . | 43 | 59 |
| 81 | 51.220 | Alive | . | . | 43 | 58 |
| 82 | 51.280 | Alive | . | . | 43 | 57 |
| 83 | 51.410 | Alive | . | . | 43 | 56 |
| 84 | 52.990 | Alive | . | . | 43 | 55 |
| 85 | 53.320 | Alive | . | . | 43 | 54 |
| 86 | 54.930 | Alive | . | . | 43 | 53 |
| 87 | 55.100 | Alive | . | . | 43 | 52 |
| 88 | 55.920 | Alive | . | . | 43 | 51 |
| 89 | 55.920 | Alive | . | . | 43 | 50 |
| 90 | 55.990 | Alive | . | . | 43 | 49 |
| 91 | 56.510 | Alive | . | . | 43 | 48 |
| 92 | 57.800 | Alive | . | . | 43 | 47 |
| 93 | 58.260 | Alive | . | . | 43 | 46 |
| 94 | 58.290 | Alive | . | . | 43 | 45 |
| 95 | 59.240 | Alive | . | . | 43 | 44 |
| 96 | 59.510 | Alive | . | . | 43 | 43 |
| 97 | 60.360 | Alive | . | . | 43 | 42 |
| 98 | 61.510 | Alive | . | . | 43 | 41 |
| 99 | 61.840 | Alive | . | . | 43 | 40 |
| 100 | 62.140 | Alive | . | . | 43 | 39 |
| 101 | 62.800 | Alive | . | . | 43 | 38 |
| 102 | 63.060 | Alive | . | . | 43 | 37 |
| 103 | 63.850 | Alive | . | . | 43 | 36 |
| 104 | 64.640 | Alive | . | . | 43 | 35 |
| 105 | 64.900 | Alive | . | . | 43 | 34 |
| 106 | 69.570 | Alive | . | . | 43 | 33 |
| 107 | 70.390 | Alive | . | . | 43 | 32 |
| 108 | 71.320 | Alive | . | . | 43 | 31 |
| 109 | 71.380 | Alive | . | . | 43 | 30 |
| 110 | 74.080 | Died | .666 | .044 | 44 | 29 |
| 111 | 74.640 | Alive | . | . | 44 | 28 |
| 112 | 75.820 | Alive | . | . | 44 | 27 |
| 113 | 76.450 | Alive | . | . | 44 | 26 |
| 114 | 76.640 | Alive | . | . | 44 | 25 |
| 115 | 78.850 | Alive | . | . | 44 | 24 |
| 116 | 79.800 | Alive | . | . | 44 | 23 |
| 117 | 80.890 | Alive | . | . | 44 | 22 |
| 118 | 81.780 | Alive | . | . | 44 | 21 |
| 119 | 83.160 | Alive | . | . | 44 | 20 |
| 120 | 85.890 | Alive | . | . | 44 | 19 |
| 121 | 87.200 | Alive | . | . | 44 | 18 |
| 122 | 87.630 | Alive | . | . | 44 | 17 |
| 123 | 88.130 | Alive | . | . | 44 | 16 |
| 124 | 88.720 | Alive | . | . | 44 | 15 |
| 125 | 89.050 | Alive | . | . | 44 | 14 |
| 126 | 90.000 | Alive | . | . | 44 | 13 |
| 127 | 91.380 | Alive | . | . | 44 | 12 |
| 128 | 91.510 | Alive | . | . | 44 | 11 |
| 129 | 92.730 | Alive | . | . | 44 | 10 |
| 130 | 95.230 | Alive | . | . | 44 | 9 |
| 131 | 95.720 | Alive | . | . | 44 | 8 |
| 132 | 96.250 | Alive | . | . | 44 | 7 |
| 133 | 97.140 | Alive | . | . | 44 | 6 |
| 134 | 97.170 | Alive | . | . | 44 | 5 |
| 135 | 98.130 | Alive | . | . | 44 | 4 |
| 136 | 98.590 | Alive | . | . | 44 | 3 |
| 137 | 98.820 | Alive | . | . | 44 | 2 |
| 138 | 100.660 | Alive | . | . | 44 | 1 |
| 139 | 104.050 | Alive | . | . | 44 | 0 |
| >=90% | 1 | .330 | Died | .995 | .005 | 1 | 191 |
| 2 | .390 | Died | .990 | .007 | 2 | 190 |
| 3 | .460 | Died | .984 | .009 | 3 | 189 |
| 4 | .490 | Died | . | . | 4 | 188 |
| 5 | .490 | Died | .974 | .011 | 5 | 187 |
| 6 | .530 | Died | .969 | .013 | 6 | 186 |
| 7 | .560 | Died | . | . | 7 | 185 |
| 8 | .560 | Died | . | . | 8 | 184 |
| 9 | .560 | Died | . | . | 9 | 183 |
| 10 | .560 | Died | .948 | .016 | 10 | 182 |
| 11 | .590 | Died | .943 | .017 | 11 | 181 |
| 12 | .630 | Died | .938 | .017 | 12 | 180 |
| 13 | .690 | Died | .932 | .018 | 13 | 179 |
| 14 | .720 | Died | .927 | .019 | 14 | 178 |
| 15 | .760 | Died | .922 | .019 | 15 | 177 |
| 16 | .790 | Died | .917 | .020 | 16 | 176 |
| 17 | .820 | Died | .911 | .021 | 17 | 175 |
| 18 | .860 | Died | .906 | .021 | 18 | 174 |
| 19 | .890 | Died | .901 | .022 | 19 | 173 |
| 20 | .950 | Died | .896 | .022 | 20 | 172 |
| 21 | 1.120 | Died | .891 | .023 | 21 | 171 |
| 22 | 1.480 | Alive | . | . | 21 | 170 |
| 23 | 3.850 | Died | .885 | .023 | 22 | 169 |
| 24 | 4.570 | Died | .880 | .023 | 23 | 168 |
| 25 | 4.740 | Died | .875 | .024 | 24 | 167 |
| 26 | 4.970 | Died | .870 | .024 | 25 | 166 |
| 27 | 5.390 | Died | .864 | .025 | 26 | 165 |
| 28 | 6.120 | Died | .859 | .025 | 27 | 164 |
| 29 | 6.510 | Died | .854 | .026 | 28 | 163 |
| 30 | 8.590 | Died | .849 | .026 | 29 | 162 |
| 31 | 9.540 | Died | .843 | .026 | 30 | 161 |
| 32 | 11.380 | Died | .838 | .027 | 31 | 160 |
| 33 | 11.510 | Died | .833 | .027 | 32 | 159 |
| 34 | 12.200 | Died | .828 | .027 | 33 | 158 |
| 35 | 14.310 | Died | .823 | .028 | 34 | 157 |
| 36 | 15.230 | Died | .817 | .028 | 35 | 156 |
| 37 | 21.090 | Died | .812 | .028 | 36 | 155 |
| 38 | 21.680 | Died | .807 | .029 | 37 | 154 |
| 39 | 21.910 | Died | .802 | .029 | 38 | 153 |
| 40 | 24.410 | Died | .796 | .029 | 39 | 152 |
| 41 | 25.300 | Died | .791 | .029 | 40 | 151 |
| 42 | 28.850 | Alive | . | . | 40 | 150 |
| 43 | 29.570 | Died | .786 | .030 | 41 | 149 |
| 44 | 31.840 | Died | .781 | .030 | 42 | 148 |
| 45 | 32.700 | Died | .775 | .030 | 43 | 147 |
| 46 | 34.280 | Died | .770 | .030 | 44 | 146 |
| 47 | 35.390 | Alive | . | . | 44 | 145 |
| 48 | 37.010 | Alive | . | . | 44 | 144 |
| 49 | 37.600 | Alive | . | . | 44 | 143 |
| 50 | 37.630 | Alive | . | . | 44 | 142 |
| 51 | 37.760 | Alive | . | . | 44 | 141 |
| 52 | 37.860 | Alive | . | . | 44 | 140 |
| 53 | 38.390 | Died | .764 | .031 | 45 | 139 |
| 54 | 38.390 | Alive | . | . | 45 | 138 |
| 55 | 38.750 | Alive | . | . | 45 | 137 |
| 56 | 39.050 | Alive | . | . | 45 | 136 |
| 57 | 39.210 | Alive | . | . | 45 | 135 |
| 58 | 39.210 | Alive | . | . | 45 | 134 |
| 59 | 39.340 | Alive | . | . | 45 | 133 |
| 60 | 39.510 | Alive | . | . | 45 | 132 |
| 61 | 39.570 | Alive | . | . | 45 | 131 |
| 62 | 39.700 | Alive | . | . | 45 | 130 |
| 63 | 39.740 | Alive | . | . | 45 | 129 |
| 64 | 39.970 | Alive | . | . | 45 | 128 |
| 65 | 40.200 | Alive | . | . | 45 | 127 |
| 66 | 40.430 | Alive | . | . | 45 | 126 |
| 67 | 40.660 | Alive | . | . | 45 | 125 |
| 68 | 41.380 | Alive | . | . | 45 | 124 |
| 69 | 41.680 | Alive | . | . | 45 | 123 |
| 70 | 41.710 | Alive | . | . | 45 | 122 |
| 71 | 41.970 | Died | .758 | .031 | 46 | 121 |
| 72 | 42.270 | Alive | . | . | 46 | 120 |
| 73 | 42.430 | Alive | . | . | 46 | 119 |
| 74 | 42.700 | Died | .752 | .031 | 47 | 118 |
| 75 | 42.760 | Alive | . | . | 47 | 117 |
| 76 | 43.420 | Alive | . | . | 47 | 116 |
| 77 | 43.590 | Alive | . | . | 47 | 115 |
| 78 | 44.740 | Alive | . | . | 47 | 114 |
| 79 | 45.430 | Alive | . | . | 47 | 113 |
| 80 | 45.790 | Alive | . | . | 47 | 112 |
| 81 | 46.050 | Alive | . | . | 47 | 111 |
| 82 | 46.120 | Alive | . | . | 47 | 110 |
| 83 | 46.280 | Alive | . | . | 47 | 109 |
| 84 | 46.280 | Alive | . | . | 47 | 108 |
| 85 | 46.740 | Died | .745 | .032 | 48 | 107 |
| 86 | 46.910 | Died | .738 | .032 | 49 | 106 |
| 87 | 47.300 | Alive | . | . | 49 | 105 |
| 88 | 48.030 | Alive | . | . | 49 | 104 |
| 89 | 48.190 | Alive | . | . | 49 | 103 |
| 90 | 48.550 | Died | .731 | .033 | 50 | 102 |
| 91 | 48.650 | Alive | . | . | 50 | 101 |
| 92 | 49.010 | Died | .724 | .033 | 51 | 100 |
| 93 | 49.180 | Alive | . | . | 51 | 99 |
| 94 | 49.240 | Alive | . | . | 51 | 98 |
| 95 | 49.280 | Alive | . | . | 51 | 97 |
| 96 | 49.410 | Alive | . | . | 51 | 96 |
| 97 | 49.800 | Alive | . | . | 51 | 95 |
| 98 | 49.930 | Alive | . | . | 51 | 94 |
| 99 | 50.260 | Alive | . | . | 51 | 93 |
| 100 | 50.630 | Alive | . | . | 51 | 92 |
| 101 | 50.720 | Alive | . | . | 51 | 91 |
| 102 | 51.320 | Alive | . | . | 51 | 90 |
| 103 | 51.880 | Alive | . | . | 51 | 89 |
| 104 | 52.040 | Alive | . | . | 51 | 88 |
| 105 | 52.270 | Alive | . | . | 51 | 87 |
| 106 | 52.300 | Alive | . | . | 51 | 86 |
| 107 | 52.430 | Alive | . | . | 51 | 85 |
| 108 | 52.570 | Alive | . | . | 51 | 84 |
| 109 | 53.060 | Died | **.715** | .034 | 52 | 83 |
| 110 | 53.090 | Alive | . | . | 52 | 82 |
| 111 | 54.440 | Alive | . | . | 52 | 81 |
| 112 | 54.540 | Alive | . | . | 52 | 80 |
| 113 | 55.130 | Alive | . | . | 52 | 79 |
| 114 | 55.200 | Alive | . | . | 52 | 78 |
| 115 | 55.530 | Alive | . | . | 52 | 77 |
| 116 | 56.020 | Alive | . | . | 52 | 76 |
| 117 | 56.280 | Alive | . | . | 52 | 75 |
| 118 | 57.040 | Alive | . | . | 52 | 74 |
| 119 | 57.070 | Alive | . | . | 52 | 73 |
| 120 | 57.270 | Alive | . | . | 52 | 72 |
| 121 | 57.430 | Alive | . | . | 52 | 71 |
| 122 | 57.700 | Alive | . | . | 52 | 70 |
| 123 | 57.930 | Alive | . | . | 52 | 69 |
| 124 | 58.060 | Alive | . | . | 52 | 68 |
| 125 | 58.590 | Alive | . | . | 52 | 67 |
| 126 | 59.050 | Alive | . | . | 52 | 66 |
| 127 | 59.110 | Alive | . | . | 52 | 65 |
| 128 | 59.140 | Alive | . | . | 52 | 64 |
| 129 | 59.240 | Alive | . | . | 52 | 63 |
| 130 | 59.410 | Alive | . | . | 52 | 62 |
| 131 | 60.200 | Alive | . | . | 52 | 61 |
| 132 | 60.530 | Alive | . | . | 52 | 60 |
| 133 | 60.790 | Alive | . | . | 52 | 59 |
| 134 | 61.020 | Alive | . | . | 52 | 58 |
| 135 | 61.220 | Alive | . | . | 52 | 57 |
| 136 | 61.250 | Died | .702 | .036 | 53 | 56 |
| 137 | 61.840 | Alive | . | . | 53 | 55 |
| 138 | 61.840 | Alive | . | . | 53 | 54 |
| 139 | 62.140 | Alive | . | . | 53 | 53 |
| 140 | 62.400 | Alive | . | . | 53 | 52 |
| 141 | 62.800 | Alive | . | . | 53 | 51 |
| 142 | 63.320 | Alive | . | . | 53 | 50 |
| 143 | 63.590 | Alive | . | . | 53 | 49 |
| 144 | 63.910 | Died | .688 | .038 | 54 | 48 |
| 145 | 64.510 | Alive | . | . | 54 | 47 |
| 146 | 64.800 | Alive | . | . | 54 | 46 |
| 147 | 65.330 | Alive | . | . | 54 | 45 |
| 148 | 65.560 | Alive | . | . | 54 | 44 |
| 149 | 66.090 | Alive | . | . | 54 | 43 |
| 150 | 66.280 | Alive | . | . | 54 | 42 |
| 151 | 67.040 | Alive | . | . | 54 | 41 |
| 152 | 67.340 | Alive | . | . | 54 | 40 |
| 153 | 67.830 | Alive | . | . | 54 | 39 |
| 154 | 68.090 | Alive | . | . | 54 | 38 |
| 155 | 68.850 | Alive | . | . | 54 | 37 |
| 156 | 68.850 | Alive | . | . | 54 | 36 |
| 157 | 69.240 | Alive | . | . | 54 | 35 |
| 158 | 69.700 | Alive | . | . | 54 | 34 |
| 159 | 70.590 | Alive | . | . | 54 | 33 |
| 160 | 71.710 | Died | .667 | .042 | 55 | 32 |
| 161 | 72.340 | Alive | . | . | 55 | 31 |
| 162 | 72.370 | Alive | . | . | 55 | 30 |
| 163 | 73.030 | Alive | . | . | 55 | 29 |
| 164 | 73.060 | Alive | . | . | 55 | 28 |
| 165 | 73.910 | Alive | . | . | 55 | 27 |
| 166 | 74.110 | Alive | . | . | 55 | 26 |
| 167 | 75.160 | Alive | . | . | 55 | 25 |
| 168 | 75.720 | Alive | . | . | 55 | 24 |
| 169 | 75.920 | Alive | . | . | 55 | 23 |
| 170 | 76.150 | Alive | . | . | 55 | 22 |
| 171 | 76.250 | Alive | . | . | 55 | 21 |
| 172 | 79.840 | Alive | . | . | 55 | 20 |
| 173 | 79.870 | Alive | . | . | 55 | 19 |
| 174 | 80.000 | Alive | . | . | 55 | 18 |
| 175 | 80.100 | Alive | . | . | 55 | 17 |
| 176 | 80.950 | Alive | . | . | 55 | 16 |
| 177 | 81.090 | Alive | . | . | 55 | 15 |
| 178 | 81.970 | Died | .623 | .058 | 56 | 14 |
| 179 | 82.760 | Alive | . | . | 56 | 13 |
| 180 | 85.260 | Alive | . | . | 56 | 12 |
| 181 | 86.640 | Alive | . | . | 56 | 11 |
| 182 | 88.190 | Alive | . | . | 56 | 10 |
| 183 | 88.220 | Alive | . | . | 56 | 9 |
| 184 | 88.720 | Alive | . | . | 56 | 8 |
| 185 | 89.080 | Alive | . | . | 56 | 7 |
| 186 | 90.820 | Alive | . | . | 56 | 6 |
| 187 | 91.220 | Alive | . | . | 56 | 5 |
| 188 | 92.430 | Alive | . | . | 56 | 4 |
| 189 | 94.340 | Alive | . | . | 56 | 3 |
| 190 | 97.040 | Alive | . | . | 56 | 2 |
| 191 | 99.900 | Alive | . | . | 56 | 1 |
| 192 | 102.400 | Alive | . | . | 56 | 0 |

| **Overall Comparisons** | | | |
| --- | --- | --- | --- |
|  | Chi-Square | df | P-value |
| Log Rank (Mantel-Cox) | .159 | 1 | **.690** |
| BM.Blasts. | | | |


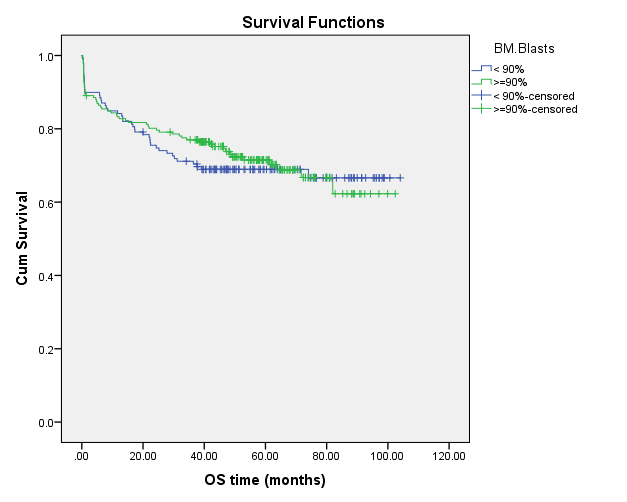


**Kaplan-Meier**

| **Case Processing Summary** | | | | |
| --- | --- | --- | --- | --- |
| 8. IPT | Total N | N of Events | Censored | |
| N | Percent |
| Pre B | **228** | **75** | 153 | 67.1% |
| Pro B | **6** | **2** | 4 | 66.7% |
| C ALL | **95** | **23** | 72 | 75.8% |
| Overall | 329 | 100 | 229 | 69.6% |

| **Survival Table** | | | | | | | |
| --- | --- | --- | --- | --- | --- | --- | --- |
| 8. IPT | | Time | Status | Cumulative Proportion Surviving at the Time | | N of Cumulative Events | N of Remaining Cases |
| Estimate | Std. Error |
| Pre B | 1 | .100 | Died | .996 | .004 | 1 | 227 |
| 2 | .330 | Died | .991 | .006 | 2 | 226 |
| 3 | .390 | Died | .987 | .008 | 3 | 225 |
| 4 | .460 | Died | . | . | 4 | 224 |
| 5 | .460 | Died | . | . | 5 | 223 |
| 6 | .460 | Died | .974 | .011 | 6 | 222 |
| 7 | .490 | Died | . | . | 7 | 221 |
| 8 | .490 | Died | .965 | .012 | 8 | 220 |
| 9 | .560 | Died | . | . | 9 | 219 |
| 10 | .560 | Died | . | . | 10 | 218 |
| 11 | .560 | Died | . | . | 11 | 217 |
| 12 | .560 | Died | .947 | .015 | 12 | 216 |
| 13 | .590 | Died | .943 | .015 | 13 | 215 |
| 14 | .630 | Died | . | . | 14 | 214 |
| 15 | .630 | Died | . | . | 15 | 213 |
| 16 | .630 | Died | . | . | 16 | 212 |
| 17 | .630 | Died | .925 | .017 | 17 | 211 |
| 18 | .690 | Died | .921 | .018 | 18 | 210 |
| 19 | .720 | Died | .917 | .018 | 19 | 209 |
| 20 | .760 | Died | .912 | .019 | 20 | 208 |
| 21 | .790 | Died | . | . | 21 | 207 |
| 22 | .790 | Died | .904 | .020 | 22 | 206 |
| 23 | .820 | Died | .899 | .020 | 23 | 205 |
| 24 | .890 | Died | . | . | 24 | 204 |
| 25 | .890 | Died | .890 | .021 | 25 | 203 |
| 26 | .920 | Died | .886 | .021 | 26 | 202 |
| 27 | .950 | Died | . | . | 27 | 201 |
| 28 | .950 | Died | .877 | .022 | 28 | 200 |
| 29 | 1.020 | Died | .873 | .022 | 29 | 199 |
| 30 | 1.120 | Died | .868 | .022 | 30 | 198 |
| 31 | 1.480 | Alive | . | . | 30 | 197 |
| 32 | 4.570 | Died | .864 | .023 | 31 | 196 |
| 33 | 4.740 | Died | .860 | .023 | 32 | 195 |
| 34 | 4.970 | Died | .855 | .023 | 33 | 194 |
| 35 | 5.390 | Died | .851 | .024 | 34 | 193 |
| 36 | 5.760 | Died | .846 | .024 | 35 | 192 |
| 37 | 5.890 | Died | .842 | .024 | 36 | 191 |
| 38 | 6.250 | Died | .838 | .024 | 37 | 190 |
| 39 | 6.410 | Died | .833 | .025 | 38 | 189 |
| 40 | 6.510 | Died | .829 | .025 | 39 | 188 |
| 41 | 7.660 | Died | .824 | .025 | 40 | 187 |
| 42 | 7.990 | Died | .820 | .025 | 41 | 186 |
| 43 | 8.420 | Died | .816 | .026 | 42 | 185 |
| 44 | 8.590 | Died | .811 | .026 | 43 | 184 |
| 45 | 9.540 | Died | .807 | .026 | 44 | 183 |
| 46 | 11.380 | Died | .802 | .026 | 45 | 182 |
| 47 | 11.680 | Died | .798 | .027 | 46 | 181 |
| 48 | 12.200 | Died | .793 | .027 | 47 | 180 |
| 49 | 13.060 | Died | .789 | .027 | 48 | 179 |
| 50 | 13.390 | Died | . | . | 49 | 178 |
| 51 | 13.390 | Died | .780 | .027 | 50 | 177 |
| 52 | 15.230 | Died | .776 | .028 | 51 | 176 |
| 53 | 16.280 | Died | .771 | .028 | 52 | 175 |
| 54 | 19.970 | Alive | . | . | 52 | 174 |
| 55 | 20.000 | Died | .767 | .028 | 53 | 173 |
| 56 | 21.090 | Died | .763 | .028 | 54 | 172 |
| 57 | 21.680 | Died | .758 | .028 | 55 | 171 |
| 58 | 21.910 | Died | .754 | .029 | 56 | 170 |
| 59 | 21.970 | Died | .749 | .029 | 57 | 169 |
| 60 | 22.300 | Died | .745 | .029 | 58 | 168 |
| 61 | 22.470 | Died | .740 | .029 | 59 | 167 |
| 62 | 24.310 | Died | .736 | .029 | 60 | 166 |
| 63 | 24.410 | Died | .732 | .029 | 61 | 165 |
| 64 | 29.570 | Died | .727 | .030 | 62 | 164 |
| 65 | 29.670 | Died | .723 | .030 | 63 | 163 |
| 66 | 31.150 | Died | .718 | .030 | 64 | 162 |
| 67 | 34.140 | Alive | . | . | 64 | 161 |
| 68 | 34.280 | Died | .714 | .030 | 65 | 160 |
| 69 | 35.390 | Alive | . | . | 65 | 159 |
| 70 | 37.010 | Alive | . | . | 65 | 158 |
| 71 | 37.630 | Alive | . | . | 65 | 157 |
| 72 | 37.660 | Died | .709 | .030 | 66 | 156 |
| 73 | 37.660 | Alive | . | . | 66 | 155 |
| 74 | 37.760 | Alive | . | . | 66 | 154 |
| 75 | 37.830 | Alive | . | . | 66 | 153 |
| 76 | 38.390 | Alive | . | . | 66 | 152 |
| 77 | 38.750 | Alive | . | . | 66 | 151 |
| 78 | 39.340 | Alive | . | . | 66 | 150 |
| 79 | 39.510 | Alive | . | . | 66 | 149 |
| 80 | 39.570 | Alive | . | . | 66 | 148 |
| 81 | 39.570 | Alive | . | . | 66 | 147 |
| 82 | 39.740 | Alive | . | . | 66 | 146 |
| 83 | 40.430 | Alive | . | . | 66 | 145 |
| 84 | 41.380 | Alive | . | . | 66 | 144 |
| 85 | 41.680 | Alive | . | . | 66 | 143 |
| 86 | 41.740 | Alive | . | . | 66 | 142 |
| 87 | 42.430 | Alive | . | . | 66 | 141 |
| 88 | 42.500 | Alive | . | . | 66 | 140 |
| 89 | 42.700 | Died | .704 | .030 | 67 | 139 |
| 90 | 42.760 | Alive | . | . | 67 | 138 |
| 91 | 43.390 | Alive | . | . | 67 | 137 |
| 92 | 43.420 | Alive | . | . | 67 | 136 |
| 93 | 43.490 | Alive | . | . | 67 | 135 |
| 94 | 43.590 | Alive | . | . | 67 | 134 |
| 95 | 43.650 | Alive | . | . | 67 | 133 |
| 96 | 43.980 | Alive | . | . | 67 | 132 |
| 97 | 44.080 | Alive | . | . | 67 | 131 |
| 98 | 44.740 | Alive | . | . | 67 | 130 |
| 99 | 45.230 | Alive | . | . | 67 | 129 |
| 100 | 45.590 | Alive | . | . | 67 | 128 |
| 101 | 45.790 | Alive | . | . | 67 | 127 |
| 102 | 46.050 | Alive | . | . | 67 | 126 |
| 103 | 46.120 | Alive | . | . | 67 | 125 |
| 104 | 46.180 | Alive | . | . | 67 | 124 |
| 105 | 46.740 | Died | .698 | .031 | 68 | 123 |
| 106 | 46.780 | Alive | . | . | 68 | 122 |
| 107 | 47.270 | Alive | . | . | 68 | 121 |
| 108 | 47.300 | Alive | . | . | 68 | 120 |
| 109 | 47.300 | Alive | . | . | 68 | 119 |
| 110 | 47.500 | Alive | . | . | 68 | 118 |
| 111 | 47.760 | Alive | . | . | 68 | 117 |
| 112 | 47.830 | Alive | . | . | 68 | 116 |
| 113 | 48.550 | Died | .692 | .031 | 69 | 115 |
| 114 | 49.010 | Died | .686 | .031 | 70 | 114 |
| 115 | 49.240 | Alive | . | . | 70 | 113 |
| 116 | 49.410 | Alive | . | . | 70 | 112 |
| 117 | 49.670 | Alive | . | . | 70 | 111 |
| 118 | 50.260 | Alive | . | . | 70 | 110 |
| 119 | 50.720 | Alive | . | . | 70 | 109 |
| 120 | 51.280 | Alive | . | . | 70 | 108 |
| 121 | 51.410 | Alive | . | . | 70 | 107 |
| 122 | 52.040 | Alive | . | . | 70 | 106 |
| 123 | 52.300 | Alive | . | . | 70 | 105 |
| 124 | 52.430 | Alive | . | . | 70 | 104 |
| 125 | 52.570 | Alive | . | . | 70 | 103 |
| 126 | 52.990 | Alive | . | . | 70 | 102 |
| 127 | 53.060 | Died | **.680** | .032 | 71 | 101 |
| 128 | 53.090 | Alive | . | . | 71 | 100 |
| 129 | 54.540 | Alive | . | . | 71 | 99 |
| 130 | 54.930 | Alive | . | . | 71 | 98 |
| 131 | 55.130 | Alive | . | . | 71 | 97 |
| 132 | 55.200 | Alive | . | . | 71 | 96 |
| 133 | 55.530 | Alive | . | . | 71 | 95 |
| 134 | 55.920 | Alive | . | . | 71 | 94 |
| 135 | 55.920 | Alive | . | . | 71 | 93 |
| 136 | 55.990 | Alive | . | . | 71 | 92 |
| 137 | 56.020 | Alive | . | . | 71 | 91 |
| 138 | 56.510 | Alive | . | . | 71 | 90 |
| 139 | 57.040 | Alive | . | . | 71 | 89 |
| 140 | 57.270 | Alive | . | . | 71 | 88 |
| 141 | 57.430 | Alive | . | . | 71 | 87 |
| 142 | 57.700 | Alive | . | . | 71 | 86 |
| 143 | 57.800 | Alive | . | . | 71 | 85 |
| 144 | 58.060 | Alive | . | . | 71 | 84 |
| 145 | 58.260 | Alive | . | . | 71 | 83 |
| 146 | 58.290 | Alive | . | . | 71 | 82 |
| 147 | 58.590 | Alive | . | . | 71 | 81 |
| 148 | 59.050 | Alive | . | . | 71 | 80 |
| 149 | 59.140 | Alive | . | . | 71 | 79 |
| 150 | 59.240 | Alive | . | . | 71 | 78 |
| 151 | 59.410 | Alive | . | . | 71 | 77 |
| 152 | 59.510 | Alive | . | . | 71 | 76 |
| 153 | 60.200 | Alive | . | . | 71 | 75 |
| 154 | 60.360 | Alive | . | . | 71 | 74 |
| 155 | 60.530 | Alive | . | . | 71 | 73 |
| 156 | 60.790 | Alive | . | . | 71 | 72 |
| 157 | 61.020 | Alive | . | . | 71 | 71 |
| 158 | 61.220 | Alive | . | . | 71 | 70 |
| 159 | 61.250 | Died | .670 | .033 | 72 | 69 |
| 160 | 61.510 | Alive | . | . | 72 | 68 |
| 161 | 61.840 | Alive | . | . | 72 | 67 |
| 162 | 61.840 | Alive | . | . | 72 | 66 |
| 163 | 61.840 | Alive | . | . | 72 | 65 |
| 164 | 62.140 | Alive | . | . | 72 | 64 |
| 165 | 62.140 | Alive | . | . | 72 | 63 |
| 166 | 62.400 | Alive | . | . | 72 | 62 |
| 167 | 62.800 | Alive | . | . | 72 | 61 |
| 168 | 62.800 | Alive | . | . | 72 | 60 |
| 169 | 63.060 | Alive | . | . | 72 | 59 |
| 170 | 63.320 | Alive | . | . | 72 | 58 |
| 171 | 63.590 | Alive | . | . | 72 | 57 |
| 172 | 63.850 | Alive | . | . | 72 | 56 |
| 173 | 63.910 | Died | .658 | .034 | 73 | 55 |
| 174 | 64.640 | Alive | . | . | 73 | 54 |
| 175 | 65.330 | Alive | . | . | 73 | 53 |
| 176 | 65.560 | Alive | . | . | 73 | 52 |
| 177 | 66.280 | Alive | . | . | 73 | 51 |
| 178 | 67.040 | Alive | . | . | 73 | 50 |
| 179 | 67.340 | Alive | . | . | 73 | 49 |
| 180 | 67.830 | Alive | . | . | 73 | 48 |
| 181 | 68.090 | Alive | . | . | 73 | 47 |
| 182 | 68.850 | Alive | . | . | 73 | 46 |
| 183 | 68.850 | Alive | . | . | 73 | 45 |
| 184 | 69.570 | Alive | . | . | 73 | 44 |
| 185 | 71.380 | Alive | . | . | 73 | 43 |
| 186 | 71.710 | Died | .643 | .037 | 74 | 42 |
| 187 | 72.340 | Alive | . | . | 74 | 41 |
| 188 | 73.030 | Alive | . | . | 74 | 40 |
| 189 | 74.080 | Died | .627 | .039 | 75 | 39 |
| 190 | 74.110 | Alive | . | . | 75 | 38 |
| 191 | 74.640 | Alive | . | . | 75 | 37 |
| 192 | 75.160 | Alive | . | . | 75 | 36 |
| 193 | 75.920 | Alive | . | . | 75 | 35 |
| 194 | 76.150 | Alive | . | . | 75 | 34 |
| 195 | 76.250 | Alive | . | . | 75 | 33 |
| 196 | 76.640 | Alive | . | . | 75 | 32 |
| 197 | 78.850 | Alive | . | . | 75 | 31 |
| 198 | 79.840 | Alive | . | . | 75 | 30 |
| 199 | 79.870 | Alive | . | . | 75 | 29 |
| 200 | 80.000 | Alive | . | . | 75 | 28 |
| 201 | 80.100 | Alive | . | . | 75 | 27 |
| 202 | 80.890 | Alive | . | . | 75 | 26 |
| 203 | 81.090 | Alive | . | . | 75 | 25 |
| 204 | 81.780 | Alive | . | . | 75 | 24 |
| 205 | 82.760 | Alive | . | . | 75 | 23 |
| 206 | 83.160 | Alive | . | . | 75 | 22 |
| 207 | 85.260 | Alive | . | . | 75 | 21 |
| 208 | 85.890 | Alive | . | . | 75 | 20 |
| 209 | 87.200 | Alive | . | . | 75 | 19 |
| 210 | 88.130 | Alive | . | . | 75 | 18 |
| 211 | 88.190 | Alive | . | . | 75 | 17 |
| 212 | 88.720 | Alive | . | . | 75 | 16 |
| 213 | 88.720 | Alive | . | . | 75 | 15 |
| 214 | 89.050 | Alive | . | . | 75 | 14 |
| 215 | 89.080 | Alive | . | . | 75 | 13 |
| 216 | 90.000 | Alive | . | . | 75 | 12 |
| 217 | 90.820 | Alive | . | . | 75 | 11 |
| 218 | 91.380 | Alive | . | . | 75 | 10 |
| 219 | 92.430 | Alive | . | . | 75 | 9 |
| 220 | 92.730 | Alive | . | . | 75 | 8 |
| 221 | 94.340 | Alive | . | . | 75 | 7 |
| 222 | 96.250 | Alive | . | . | 75 | 6 |
| 223 | 97.040 | Alive | . | . | 75 | 5 |
| 224 | 98.130 | Alive | . | . | 75 | 4 |
| 225 | 98.590 | Alive | . | . | 75 | 3 |
| 226 | 98.820 | Alive | . | . | 75 | 2 |
| 227 | 100.660 | Alive | . | . | 75 | 1 |
| 228 | 104.050 | Alive | . | . | 75 | 0 |
| Pro B | 1 | 31.840 | Died | .833 | .152 | 1 | 5 |
| 2 | 36.450 | Died | **.667** | .192 | 2 | 4 |
| 3 | 41.970 | Alive | . | . | 2 | 3 |
| 4 | 43.130 | Alive | . | . | 2 | 2 |
| 5 | 46.580 | Alive | . | . | 2 | 1 |
| 6 | 66.090 | Alive | . | . | 2 | 0 |
| C ALL | 1 | .530 | Died | .989 | .010 | 1 | 94 |
| 2 | .630 | Died | .979 | .015 | 2 | 93 |
| 3 | .720 | Died | .968 | .018 | 3 | 92 |
| 4 | .760 | Died | .958 | .021 | 4 | 91 |
| 5 | .860 | Died | .947 | .023 | 5 | 90 |
| 6 | 3.850 | Died | .937 | .025 | 6 | 89 |
| 7 | 6.120 | Died | .926 | .027 | 7 | 88 |
| 8 | 11.510 | Died | .916 | .028 | 8 | 87 |
| 9 | 14.310 | Died | .905 | .030 | 9 | 86 |
| 10 | 16.680 | Died | .895 | .031 | 10 | 85 |
| 11 | 17.240 | Died | .884 | .033 | 11 | 84 |
| 12 | 17.340 | Died | .874 | .034 | 12 | 83 |
| 13 | 22.240 | Died | .863 | .035 | 13 | 82 |
| 14 | 25.200 | Died | .853 | .036 | 14 | 81 |
| 15 | 25.300 | Died | .842 | .037 | 15 | 80 |
| 16 | 27.830 | Died | .832 | .038 | 16 | 79 |
| 17 | 28.850 | Alive | . | . | 16 | 78 |
| 18 | 30.230 | Died | .821 | .039 | 17 | 77 |
| 19 | 32.700 | Died | .810 | .040 | 18 | 76 |
| 20 | 37.600 | Alive | . | . | 18 | 75 |
| 21 | 37.600 | Alive | . | . | 18 | 74 |
| 22 | 37.860 | Alive | . | . | 18 | 73 |
| 23 | 38.390 | Died | .799 | .041 | 19 | 72 |
| 24 | 39.050 | Alive | . | . | 19 | 71 |
| 25 | 39.210 | Died | .788 | .042 | 20 | 70 |
| 26 | 39.210 | Alive | . | . | 20 | 69 |
| 27 | 39.210 | Alive | . | . | 20 | 68 |
| 28 | 39.240 | Alive | . | . | 20 | 67 |
| 29 | 39.700 | Alive | . | . | 20 | 66 |
| 30 | 39.800 | Alive | . | . | 20 | 65 |
| 31 | 39.970 | Alive | . | . | 20 | 64 |
| 32 | 40.200 | Alive | . | . | 20 | 63 |
| 33 | 40.490 | Alive | . | . | 20 | 62 |
| 34 | 40.590 | Alive | . | . | 20 | 61 |
| 35 | 40.660 | Alive | . | . | 20 | 60 |
| 36 | 41.680 | Alive | . | . | 20 | 59 |
| 37 | 41.710 | Alive | . | . | 20 | 58 |
| 38 | 41.970 | Died | .774 | .044 | 21 | 57 |
| 39 | 42.270 | Alive | . | . | 21 | 56 |
| 40 | 45.430 | Alive | . | . | 21 | 55 |
| 41 | 46.280 | Alive | . | . | 21 | 54 |
| 42 | 46.280 | Alive | . | . | 21 | 53 |
| 43 | 46.910 | Died | **.760** | .045 | 22 | 52 |
| 44 | 47.170 | Alive | . | . | 22 | 51 |
| 45 | 48.030 | Alive | . | . | 22 | 50 |
| 46 | 48.190 | Alive | . | . | 22 | 49 |
| 47 | 48.450 | Alive | . | . | 22 | 48 |
| 48 | 48.650 | Alive | . | . | 22 | 47 |
| 49 | 49.180 | Alive | . | . | 22 | 46 |
| 50 | 49.280 | Alive | . | . | 22 | 45 |
| 51 | 49.310 | Alive | . | . | 22 | 44 |
| 52 | 49.800 | Alive | . | . | 22 | 43 |
| 53 | 49.840 | Alive | . | . | 22 | 42 |
| 54 | 49.930 | Alive | . | . | 22 | 41 |
| 55 | 50.000 | Alive | . | . | 22 | 40 |
| 56 | 50.430 | Alive | . | . | 22 | 39 |
| 57 | 50.630 | Alive | . | . | 22 | 38 |
| 58 | 51.220 | Alive | . | . | 22 | 37 |
| 59 | 51.320 | Alive | . | . | 22 | 36 |
| 60 | 51.880 | Alive | . | . | 22 | 35 |
| 61 | 52.270 | Alive | . | . | 22 | 34 |
| 62 | 53.320 | Alive | . | . | 22 | 33 |
| 63 | 54.440 | Alive | . | . | 22 | 32 |
| 64 | 55.100 | Alive | . | . | 22 | 31 |
| 65 | 56.280 | Alive | . | . | 22 | 30 |
| 66 | 57.070 | Alive | . | . | 22 | 29 |
| 67 | 57.930 | Alive | . | . | 22 | 28 |
| 68 | 59.110 | Alive | . | . | 22 | 27 |
| 69 | 64.510 | Alive | . | . | 22 | 26 |
| 70 | 64.800 | Alive | . | . | 22 | 25 |
| 71 | 64.900 | Alive | . | . | 22 | 24 |
| 72 | 69.240 | Alive | . | . | 22 | 23 |
| 73 | 69.700 | Alive | . | . | 22 | 22 |
| 74 | 70.390 | Alive | . | . | 22 | 21 |
| 75 | 70.590 | Alive | . | . | 22 | 20 |
| 76 | 71.320 | Alive | . | . | 22 | 19 |
| 77 | 72.370 | Alive | . | . | 22 | 18 |
| 78 | 73.060 | Alive | . | . | 22 | 17 |
| 79 | 73.910 | Alive | . | . | 22 | 16 |
| 80 | 75.820 | Alive | . | . | 22 | 15 |
| 81 | 76.450 | Alive | . | . | 22 | 14 |
| 82 | 79.800 | Alive | . | . | 22 | 13 |
| 83 | 80.950 | Alive | . | . | 22 | 12 |
| 84 | 81.970 | Died | .696 | .073 | 23 | 11 |
| 85 | 86.640 | Alive | . | . | 23 | 10 |
| 86 | 87.630 | Alive | . | . | 23 | 9 |
| 87 | 88.220 | Alive | . | . | 23 | 8 |
| 88 | 91.220 | Alive | . | . | 23 | 7 |
| 89 | 91.510 | Alive | . | . | 23 | 6 |
| 90 | 95.230 | Alive | . | . | 23 | 5 |
| 91 | 95.720 | Alive | . | . | 23 | 4 |
| 92 | 97.140 | Alive | . | . | 23 | 3 |
| 93 | 97.170 | Alive | . | . | 23 | 2 |
| 94 | 99.900 | Alive | . | . | 23 | 1 |
| 95 | 102.400 | Alive | . | . | 23 | 0 |

| **Overall Comparisons** | | | |
| --- | --- | --- | --- |
|  | Chi-Square | df | P-value |
| Log Rank (Mantel-Cox) | 2.774 | 2 | **.250** |
| 8. IPT. | | | |


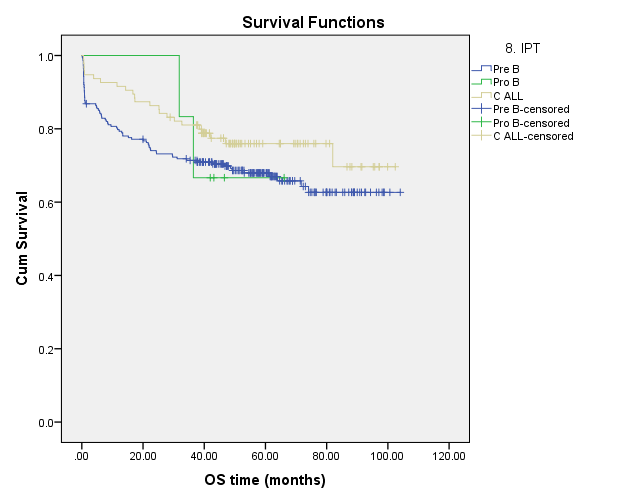


**Kaplan-Meier**

| **Case Processing Summary** | | | | |
| --- | --- | --- | --- | --- |
|  | | | | |
| 9. Cellularity of BM | Total N | N of Events | Censored | |
| N | Percent |
| Normocellular | **115** | **37** | 78 | 67.8% |
| Hypocellular | **43** | **14** | 29 | 67.4% |
| Hypercellular | **172** | **49** | 123 | 71.5% |
| Overall | 330 | 100 | 230 | 69.7% |

| **Survival Table** | | | | | | | |
| --- | --- | --- | --- | --- | --- | --- | --- |
| 9. Cellularity of BM | | Time | Status | Cumulative Proportion Surviving at the Time | | N of Cumulative Events | N of Remaining Cases |
| Estimate | Std. Error |
| Normocellular | 1 | .390 | Died | .991 | .009 | 1 | 114 |
| 2 | .630 | Died | . | . | 2 | 113 |
| 3 | .630 | Died | .974 | .015 | 3 | 112 |
| 4 | .760 | Died | .965 | .017 | 4 | 111 |
| 5 | .790 | Died | . | . | 5 | 110 |
| 6 | .790 | Died | .948 | .021 | 6 | 109 |
| 7 | .890 | Died | .939 | .022 | 7 | 108 |
| 8 | .920 | Died | .930 | .024 | 8 | 107 |
| 9 | .950 | Died | . | . | 9 | 106 |
| 10 | .950 | Died | .913 | .026 | 10 | 105 |
| 11 | 1.120 | Died | .904 | .027 | 11 | 104 |
| 12 | 3.850 | Died | .896 | .029 | 12 | 103 |
| 13 | 4.970 | Died | .887 | .030 | 13 | 102 |
| 14 | 5.760 | Died | .878 | .030 | 14 | 101 |
| 15 | 5.890 | Died | .870 | .031 | 15 | 100 |
| 16 | 6.510 | Died | .861 | .032 | 16 | 99 |
| 17 | 11.380 | Died | .852 | .033 | 17 | 98 |
| 18 | 11.680 | Died | .843 | .034 | 18 | 97 |
| 19 | 12.200 | Died | .835 | .035 | 19 | 96 |
| 20 | 13.060 | Died | .826 | .035 | 20 | 95 |
| 21 | 15.230 | Died | .817 | .036 | 21 | 94 |
| 22 | 16.280 | Died | .809 | .037 | 22 | 93 |
| 23 | 16.680 | Died | .800 | .037 | 23 | 92 |
| 24 | 20.000 | Died | .791 | .038 | 24 | 91 |
| 25 | 21.910 | Died | .783 | .038 | 25 | 90 |
| 26 | 21.970 | Died | .774 | .039 | 26 | 89 |
| 27 | 25.300 | Died | .765 | .040 | 27 | 88 |
| 28 | 27.830 | Died | .757 | .040 | 28 | 87 |
| 29 | 28.850 | Alive | . | . | 28 | 86 |
| 30 | 29.570 | Died | .748 | .041 | 29 | 85 |
| 31 | 29.670 | Died | .739 | .041 | 30 | 84 |
| 32 | 32.700 | Died | .730 | .041 | 31 | 83 |
| 33 | 35.390 | Alive | . | . | 31 | 82 |
| 34 | 37.600 | Alive | . | . | 31 | 81 |
| 35 | 37.630 | Alive | . | . | 31 | 80 |
| 36 | 37.760 | Alive | . | . | 31 | 79 |
| 37 | 37.860 | Alive | . | . | 31 | 78 |
| 38 | 38.390 | Died | .721 | .042 | 32 | 77 |
| 39 | 38.390 | Alive | . | . | 32 | 76 |
| 40 | 39.210 | Died | .711 | .042 | 33 | 75 |
| 41 | 39.570 | Alive | . | . | 33 | 74 |
| 42 | 39.700 | Alive | . | . | 33 | 73 |
| 43 | 39.740 | Alive | . | . | 33 | 72 |
| 44 | 39.800 | Alive | . | . | 33 | 71 |
| 45 | 40.660 | Alive | . | . | 33 | 70 |
| 46 | 41.380 | Alive | . | . | 33 | 69 |
| 47 | 42.270 | Alive | . | . | 33 | 68 |
| 48 | 42.430 | Alive | . | . | 33 | 67 |
| 49 | 42.500 | Alive | . | . | 33 | 66 |
| 50 | 43.130 | Alive | . | . | 33 | 65 |
| 51 | 43.650 | Alive | . | . | 33 | 64 |
| 52 | 44.080 | Alive | . | . | 33 | 63 |
| 53 | 45.230 | Alive | . | . | 33 | 62 |
| 54 | 45.430 | Alive | . | . | 33 | 61 |
| 55 | 45.590 | Alive | . | . | 33 | 60 |
| 56 | 45.790 | Alive | . | . | 33 | 59 |
| 57 | 46.280 | Alive | . | . | 33 | 58 |
| 58 | 46.740 | Died | .699 | .043 | 34 | 57 |
| 59 | 47.270 | Alive | . | . | 34 | 56 |
| 60 | 47.300 | Alive | . | . | 34 | 55 |
| 61 | 47.760 | Alive | . | . | 34 | 54 |
| 62 | 47.830 | Alive | . | . | 34 | 53 |
| 63 | 49.180 | Alive | . | . | 34 | 52 |
| 64 | 49.280 | Alive | . | . | 34 | 51 |
| 65 | 49.310 | Alive | . | . | 34 | 50 |
| 66 | 49.840 | Alive | . | . | 34 | 49 |
| 67 | 49.930 | Alive | . | . | 34 | 48 |
| 68 | 50.630 | Alive | . | . | 34 | 47 |
| 69 | 51.220 | Alive | . | . | 34 | 46 |
| 70 | 51.280 | Alive | . | . | 34 | 45 |
| 71 | 51.320 | Alive | . | . | 34 | 44 |
| 72 | 52.430 | Alive | . | . | 34 | 43 |
| 73 | 52.570 | Alive | . | . | 34 | 42 |
| 74 | 53.060 | Died | **.682** | .045 | 35 | 41 |
| 75 | 55.100 | Alive | . | . | 35 | 40 |
| 76 | 55.130 | Alive | . | . | 35 | 39 |
| 77 | 55.920 | Alive | . | . | 35 | 38 |
| 78 | 55.920 | Alive | . | . | 35 | 37 |
| 79 | 57.040 | Alive | . | . | 35 | 36 |
| 80 | 57.270 | Alive | . | . | 35 | 35 |
| 81 | 58.260 | Alive | . | . | 35 | 34 |
| 82 | 58.290 | Alive | . | . | 35 | 33 |
| 83 | 59.050 | Alive | . | . | 35 | 32 |
| 84 | 59.410 | Alive | . | . | 35 | 31 |
| 85 | 60.360 | Alive | . | . | 35 | 30 |
| 86 | 61.220 | Alive | . | . | 35 | 29 |
| 87 | 61.250 | Died | .659 | .050 | 36 | 28 |
| 88 | 61.510 | Alive | . | . | 36 | 27 |
| 89 | 61.840 | Alive | . | . | 36 | 26 |
| 90 | 62.140 | Alive | . | . | 36 | 25 |
| 91 | 62.400 | Alive | . | . | 36 | 24 |
| 92 | 62.800 | Alive | . | . | 36 | 23 |
| 93 | 63.060 | Alive | . | . | 36 | 22 |
| 94 | 63.320 | Alive | . | . | 36 | 21 |
| 95 | 63.590 | Alive | . | . | 36 | 20 |
| 96 | 64.640 | Alive | . | . | 36 | 19 |
| 97 | 64.900 | Alive | . | . | 36 | 18 |
| 98 | 66.280 | Alive | . | . | 36 | 17 |
| 99 | 67.340 | Alive | . | . | 36 | 16 |
| 100 | 70.390 | Alive | . | . | 36 | 15 |
| 101 | 73.030 | Alive | . | . | 36 | 14 |
| 102 | 73.910 | Alive | . | . | 36 | 13 |
| 103 | 74.640 | Alive | . | . | 36 | 12 |
| 104 | 76.250 | Alive | . | . | 36 | 11 |
| 105 | 76.450 | Alive | . | . | 36 | 10 |
| 106 | 80.890 | Alive | . | . | 36 | 9 |
| 107 | 81.780 | Alive | . | . | 36 | 8 |
| 108 | 81.970 | Died | .576 | .088 | 37 | 7 |
| 109 | 85.890 | Alive | . | . | 37 | 6 |
| 110 | 87.200 | Alive | . | . | 37 | 5 |
| 111 | 87.630 | Alive | . | . | 37 | 4 |
| 112 | 90.000 | Alive | . | . | 37 | 3 |
| 113 | 92.730 | Alive | . | . | 37 | 2 |
| 114 | 98.130 | Alive | . | . | 37 | 1 |
| 115 | 98.590 | Alive | . | . | 37 | 0 |
| Hypocellular | 1 | .100 | Died | .977 | .023 | 1 | 42 |
| 2 | .460 | Died | . | . | 2 | 41 |
| 3 | .460 | Died | .930 | .039 | 3 | 40 |
| 4 | .560 | Died | .907 | .044 | 4 | 39 |
| 5 | .630 | Died | .884 | .049 | 5 | 38 |
| 6 | .690 | Died | .860 | .053 | 6 | 37 |
| 7 | 8.420 | Died | .837 | .056 | 7 | 36 |
| 8 | 17.240 | Died | .814 | .059 | 8 | 35 |
| 9 | 17.340 | Died | .791 | .062 | 9 | 34 |
| 10 | 22.240 | Died | .767 | .064 | 10 | 33 |
| 11 | 22.300 | Died | .744 | .067 | 11 | 32 |
| 12 | 22.470 | Died | .721 | .068 | 12 | 31 |
| 13 | 24.310 | Died | **.698** | .070 | 13 | 30 |
| 14 | 39.240 | Alive | . | . | 13 | 29 |
| 15 | 40.490 | Alive | . | . | 13 | 28 |
| 16 | 43.390 | Alive | . | . | 13 | 27 |
| 17 | 43.980 | Alive | . | . | 13 | 26 |
| 18 | 46.580 | Alive | . | . | 13 | 25 |
| 19 | 47.170 | Alive | . | . | 13 | 24 |
| 20 | 48.030 | Alive | . | . | 13 | 23 |
| 21 | 50.000 | Alive | . | . | 13 | 22 |
| 22 | 52.990 | Alive | . | . | 13 | 21 |
| 23 | 53.320 | Alive | . | . | 13 | 20 |
| 24 | 56.280 | Alive | . | . | 13 | 19 |
| 25 | 57.800 | Alive | . | . | 13 | 18 |
| 26 | 57.930 | Alive | . | . | 13 | 17 |
| 27 | 59.240 | Alive | . | . | 13 | 16 |
| 28 | 59.510 | Alive | . | . | 13 | 15 |
| 29 | 71.380 | Alive | . | . | 13 | 14 |
| 30 | 72.340 | Alive | . | . | 13 | 13 |
| 31 | 74.080 | Died | .644 | .083 | 14 | 12 |
| 32 | 75.820 | Alive | . | . | 14 | 11 |
| 33 | 76.640 | Alive | . | . | 14 | 10 |
| 34 | 79.800 | Alive | . | . | 14 | 9 |
| 35 | 80.950 | Alive | . | . | 14 | 8 |
| 36 | 86.640 | Alive | . | . | 14 | 7 |
| 37 | 88.130 | Alive | . | . | 14 | 6 |
| 38 | 95.230 | Alive | . | . | 14 | 5 |
| 39 | 95.720 | Alive | . | . | 14 | 4 |
| 40 | 96.250 | Alive | . | . | 14 | 3 |
| 41 | 97.140 | Alive | . | . | 14 | 2 |
| 42 | 97.170 | Alive | . | . | 14 | 1 |
| 43 | 99.900 | Alive | . | . | 14 | 0 |
| Hypercellular | 1 | .330 | Died | .994 | .006 | 1 | 171 |
| 2 | .460 | Died | .988 | .008 | 2 | 170 |
| 3 | .490 | Died | . | . | 3 | 169 |
| 4 | .490 | Died | .977 | .011 | 4 | 168 |
| 5 | .530 | Died | .971 | .013 | 5 | 167 |
| 6 | .560 | Died | . | . | 6 | 166 |
| 7 | .560 | Died | . | . | 7 | 165 |
| 8 | .560 | Died | .953 | .016 | 8 | 164 |
| 9 | .590 | Died | .948 | .017 | 9 | 163 |
| 10 | .630 | Died | . | . | 10 | 162 |
| 11 | .630 | Died | .936 | .019 | 11 | 161 |
| 12 | .720 | Died | . | . | 12 | 160 |
| 13 | .720 | Died | .924 | .020 | 13 | 159 |
| 14 | .760 | Died | .919 | .021 | 14 | 158 |
| 15 | .820 | Died | .913 | .022 | 15 | 157 |
| 16 | .860 | Died | .907 | .022 | 16 | 156 |
| 17 | .890 | Died | .901 | .023 | 17 | 155 |
| 18 | 1.020 | Died | .895 | .023 | 18 | 154 |
| 19 | 1.480 | Alive | . | . | 18 | 153 |
| 20 | 4.570 | Died | .889 | .024 | 19 | 152 |
| 21 | 4.740 | Died | .884 | .024 | 20 | 151 |
| 22 | 5.390 | Died | .878 | .025 | 21 | 150 |
| 23 | 6.120 | Died | .872 | .025 | 22 | 149 |
| 24 | 6.250 | Died | .866 | .026 | 23 | 148 |
| 25 | 6.410 | Died | .860 | .026 | 24 | 147 |
| 26 | 7.660 | Died | .854 | .027 | 25 | 146 |
| 27 | 7.990 | Died | .849 | .027 | 26 | 145 |
| 28 | 8.590 | Died | .843 | .028 | 27 | 144 |
| 29 | 9.540 | Died | .837 | .028 | 28 | 143 |
| 30 | 11.510 | Died | .831 | .029 | 29 | 142 |
| 31 | 13.390 | Died | . | . | 30 | 141 |
| 32 | 13.390 | Died | .819 | .029 | 31 | 140 |
| 33 | 14.310 | Died | .813 | .030 | 32 | 139 |
| 34 | 19.970 | Alive | . | . | 32 | 138 |
| 35 | 21.090 | Died | .808 | .030 | 33 | 137 |
| 36 | 21.680 | Died | .802 | .030 | 34 | 136 |
| 37 | 24.410 | Died | .796 | .031 | 35 | 135 |
| 38 | 25.200 | Died | .790 | .031 | 36 | 134 |
| 39 | 30.230 | Died | .784 | .031 | 37 | 133 |
| 40 | 31.150 | Died | .778 | .032 | 38 | 132 |
| 41 | 31.840 | Died | .772 | .032 | 39 | 131 |
| 42 | 34.140 | Alive | . | . | 39 | 130 |
| 43 | 34.280 | Died | .766 | .032 | 40 | 129 |
| 44 | 36.450 | Died | .760 | .033 | 41 | 128 |
| 45 | 37.010 | Alive | . | . | 41 | 127 |
| 46 | 37.600 | Alive | . | . | 41 | 126 |
| 47 | 37.660 | Died | .754 | .033 | 42 | 125 |
| 48 | 37.660 | Alive | . | . | 42 | 124 |
| 49 | 37.830 | Alive | . | . | 42 | 123 |
| 50 | 38.750 | Alive | . | . | 42 | 122 |
| 51 | 39.050 | Alive | . | . | 42 | 121 |
| 52 | 39.210 | Alive | . | . | 42 | 120 |
| 53 | 39.210 | Alive | . | . | 42 | 119 |
| 54 | 39.340 | Alive | . | . | 42 | 118 |
| 55 | 39.510 | Alive | . | . | 42 | 117 |
| 56 | 39.570 | Alive | . | . | 42 | 116 |
| 57 | 39.970 | Alive | . | . | 42 | 115 |
| 58 | 40.200 | Alive | . | . | 42 | 114 |
| 59 | 40.430 | Alive | . | . | 42 | 113 |
| 60 | 40.590 | Alive | . | . | 42 | 112 |
| 61 | 41.680 | Alive | . | . | 42 | 111 |
| 62 | 41.680 | Alive | . | . | 42 | 110 |
| 63 | 41.710 | Alive | . | . | 42 | 109 |
| 64 | 41.740 | Alive | . | . | 42 | 108 |
| 65 | 41.970 | Died | .747 | .033 | 43 | 107 |
| 66 | 41.970 | Alive | . | . | 43 | 106 |
| 67 | 42.700 | Died | .740 | .034 | 44 | 105 |
| 68 | 42.760 | Alive | . | . | 44 | 104 |
| 69 | 43.420 | Alive | . | . | 44 | 103 |
| 70 | 43.490 | Alive | . | . | 44 | 102 |
| 71 | 43.590 | Alive | . | . | 44 | 101 |
| 72 | 44.740 | Alive | . | . | 44 | 100 |
| 73 | 46.050 | Alive | . | . | 44 | 99 |
| 74 | 46.120 | Alive | . | . | 44 | 98 |
| 75 | 46.180 | Alive | . | . | 44 | 97 |
| 76 | 46.280 | Alive | . | . | 44 | 96 |
| 77 | 46.780 | Alive | . | . | 44 | 95 |
| 78 | 46.910 | Died | .732 | .034 | 45 | 94 |
| 79 | 47.300 | Alive | . | . | 45 | 93 |
| 80 | 47.500 | Alive | . | . | 45 | 92 |
| 81 | 48.190 | Alive | . | . | 45 | 91 |
| 82 | 48.450 | Alive | . | . | 45 | 90 |
| 83 | 48.550 | Died | .724 | .035 | 46 | 89 |
| 84 | 48.650 | Alive | . | . | 46 | 88 |
| 85 | 49.010 | Died | **.716** | .035 | 47 | 87 |
| 86 | 49.240 | Alive | . | . | 47 | 86 |
| 87 | 49.410 | Alive | . | . | 47 | 85 |
| 88 | 49.670 | Alive | . | . | 47 | 84 |
| 89 | 49.800 | Alive | . | . | 47 | 83 |
| 90 | 50.260 | Alive | . | . | 47 | 82 |
| 91 | 50.430 | Alive | . | . | 47 | 81 |
| 92 | 50.720 | Alive | . | . | 47 | 80 |
| 93 | 51.410 | Alive | . | . | 47 | 79 |
| 94 | 51.880 | Alive | . | . | 47 | 78 |
| 95 | 52.040 | Alive | . | . | 47 | 77 |
| 96 | 52.270 | Alive | . | . | 47 | 76 |
| 97 | 52.300 | Alive | . | . | 47 | 75 |
| 98 | 53.090 | Alive | . | . | 47 | 74 |
| 99 | 54.440 | Alive | . | . | 47 | 73 |
| 100 | 54.540 | Alive | . | . | 47 | 72 |
| 101 | 54.930 | Alive | . | . | 47 | 71 |
| 102 | 55.200 | Alive | . | . | 47 | 70 |
| 103 | 55.530 | Alive | . | . | 47 | 69 |
| 104 | 55.990 | Alive | . | . | 47 | 68 |
| 105 | 56.020 | Alive | . | . | 47 | 67 |
| 106 | 56.510 | Alive | . | . | 47 | 66 |
| 107 | 57.070 | Alive | . | . | 47 | 65 |
| 108 | 57.430 | Alive | . | . | 47 | 64 |
| 109 | 57.700 | Alive | . | . | 47 | 63 |
| 110 | 58.060 | Alive | . | . | 47 | 62 |
| 111 | 58.590 | Alive | . | . | 47 | 61 |
| 112 | 59.110 | Alive | . | . | 47 | 60 |
| 113 | 59.140 | Alive | . | . | 47 | 59 |
| 114 | 59.240 | Alive | . | . | 47 | 58 |
| 115 | 60.200 | Alive | . | . | 47 | 57 |
| 116 | 60.530 | Alive | . | . | 47 | 56 |
| 117 | 60.790 | Alive | . | . | 47 | 55 |
| 118 | 61.020 | Alive | . | . | 47 | 54 |
| 119 | 61.840 | Alive | . | . | 47 | 53 |
| 120 | 61.840 | Alive | . | . | 47 | 52 |
| 121 | 62.140 | Alive | . | . | 47 | 51 |
| 122 | 62.800 | Alive | . | . | 47 | 50 |
| 123 | 63.850 | Alive | . | . | 47 | 49 |
| 124 | 63.910 | Died | .701 | .038 | 48 | 48 |
| 125 | 64.510 | Alive | . | . | 48 | 47 |
| 126 | 64.800 | Alive | . | . | 48 | 46 |
| 127 | 65.330 | Alive | . | . | 48 | 45 |
| 128 | 65.560 | Alive | . | . | 48 | 44 |
| 129 | 66.090 | Alive | . | . | 48 | 43 |
| 130 | 67.040 | Alive | . | . | 48 | 42 |
| 131 | 67.830 | Alive | . | . | 48 | 41 |
| 132 | 68.090 | Alive | . | . | 48 | 40 |
| 133 | 68.850 | Alive | . | . | 48 | 39 |
| 134 | 68.850 | Alive | . | . | 48 | 38 |
| 135 | 69.240 | Alive | . | . | 48 | 37 |
| 136 | 69.570 | Alive | . | . | 48 | 36 |
| 137 | 69.700 | Alive | . | . | 48 | 35 |
| 138 | 70.590 | Alive | . | . | 48 | 34 |
| 139 | 71.320 | Alive | . | . | 48 | 33 |
| 140 | 71.710 | Died | .680 | .042 | 49 | 32 |
| 141 | 72.370 | Alive | . | . | 49 | 31 |
| 142 | 73.060 | Alive | . | . | 49 | 30 |
| 143 | 74.110 | Alive | . | . | 49 | 29 |
| 144 | 75.160 | Alive | . | . | 49 | 28 |
| 145 | 75.720 | Alive | . | . | 49 | 27 |
| 146 | 75.920 | Alive | . | . | 49 | 26 |
| 147 | 76.150 | Alive | . | . | 49 | 25 |
| 148 | 78.850 | Alive | . | . | 49 | 24 |
| 149 | 79.840 | Alive | . | . | 49 | 23 |
| 150 | 80.000 | Alive | . | . | 49 | 22 |
| 151 | 80.100 | Alive | . | . | 49 | 21 |
| 152 | 81.090 | Alive | . | . | 49 | 20 |
| 153 | 82.760 | Alive | . | . | 49 | 19 |
| 154 | 83.160 | Alive | . | . | 49 | 18 |
| 155 | 85.260 | Alive | . | . | 49 | 17 |
| 156 | 88.190 | Alive | . | . | 49 | 16 |
| 157 | 88.220 | Alive | . | . | 49 | 15 |
| 158 | 88.720 | Alive | . | . | 49 | 14 |
| 159 | 88.720 | Alive | . | . | 49 | 13 |
| 160 | 89.050 | Alive | . | . | 49 | 12 |
| 161 | 89.080 | Alive | . | . | 49 | 11 |
| 162 | 90.820 | Alive | . | . | 49 | 10 |
| 163 | 91.220 | Alive | . | . | 49 | 9 |
| 164 | 91.380 | Alive | . | . | 49 | 8 |
| 165 | 91.510 | Alive | . | . | 49 | 7 |
| 166 | 92.430 | Alive | . | . | 49 | 6 |
| 167 | 94.340 | Alive | . | . | 49 | 5 |
| 168 | 97.040 | Alive | . | . | 49 | 4 |
| 169 | 98.820 | Alive | . | . | 49 | 3 |
| 170 | 100.660 | Alive | . | . | 49 | 2 |
| 171 | 102.400 | Alive | . | . | 49 | 1 |
| 172 | 104.050 | Alive | . | . | 49 | 0 |

| **Overall Comparisons** | | | |
| --- | --- | --- | --- |
|  | Chi-Square | df | P-value |
| Log Rank (Mantel-Cox) | .484 | 2 | **.785** |
| 9. Cellularity of BM. | | | |


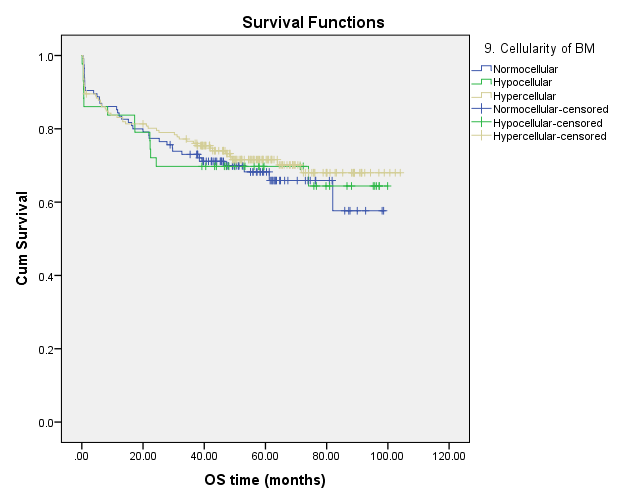


**Kaplan-Meier**

| **Case Processing Summary** | | | | |
| --- | --- | --- | --- | --- |
| DNA.Index | Total N | N of Events | Censored | |
| N | Percent |
| Good | 59 | 15 | 44 | 74.6% |
| Bad | 272 | 85 | 187 | 68.8% |
| Overall | 331 | 100 | 231 | 69.8% |

| **Survival Table** | | | | | | | |
| --- | --- | --- | --- | --- | --- | --- | --- |
| DNA.Index | | Time | Status | Cumulative Proportion Surviving at the Time | | N of Cumulative Events | N of Remaining Cases |
| Estimate | Std. Error |
| Good | 1 | .390 | Died | .983 | .017 | 1 | 58 |
| 2 | .460 | Died | .966 | .024 | 2 | 57 |
| 3 | .590 | Died | .949 | .029 | 3 | 56 |
| 4 | .630 | Died | .932 | .033 | 4 | 55 |
| 5 | .820 | Died | .915 | .036 | 5 | 54 |
| 6 | 5.890 | Died | .898 | .039 | 6 | 53 |
| 7 | 6.250 | Died | .881 | .042 | 7 | 52 |
| 8 | 7.660 | Died | .864 | .045 | 8 | 51 |
| 9 | 21.090 | Died | .847 | .047 | 9 | 50 |
| 10 | 21.970 | Died | .831 | .049 | 10 | 49 |
| 11 | 22.300 | Died | .814 | .051 | 11 | 48 |
| 12 | 24.410 | Died | .797 | .052 | 12 | 47 |
| 13 | 28.850 | Alive | . | . | 12 | 46 |
| 14 | 29.670 | Died | .779 | .054 | 13 | 45 |
| 15 | 31.840 | Died | .762 | .056 | 14 | 44 |
| 16 | 34.140 | Alive | . | . | 14 | 43 |
| 17 | 36.450 | Died | **.744** | .057 | 15 | 42 |
| 18 | 37.010 | Alive | . | . | 15 | 41 |
| 19 | 37.660 | Alive | . | . | 15 | 40 |
| 20 | 39.570 | Alive | . | . | 15 | 39 |
| 21 | 39.700 | Alive | . | . | 15 | 38 |
| 22 | 40.490 | Alive | . | . | 15 | 37 |
| 23 | 40.590 | Alive | . | . | 15 | 36 |
| 24 | 42.430 | Alive | . | . | 15 | 35 |
| 25 | 42.760 | Alive | . | . | 15 | 34 |
| 26 | 45.230 | Alive | . | . | 15 | 33 |
| 27 | 46.280 | Alive | . | . | 15 | 32 |
| 28 | 46.280 | Alive | . | . | 15 | 31 |
| 29 | 47.170 | Alive | . | . | 15 | 30 |
| 30 | 47.300 | Alive | . | . | 15 | 29 |
| 31 | 49.280 | Alive | . | . | 15 | 28 |
| 32 | 49.410 | Alive | . | . | 15 | 27 |
| 33 | 50.260 | Alive | . | . | 15 | 26 |
| 34 | 52.040 | Alive | . | . | 15 | 25 |
| 35 | 52.430 | Alive | . | . | 15 | 24 |
| 36 | 52.990 | Alive | . | . | 15 | 23 |
| 37 | 53.320 | Alive | . | . | 15 | 22 |
| 38 | 55.920 | Alive | . | . | 15 | 21 |
| 39 | 57.800 | Alive | . | . | 15 | 20 |
| 40 | 57.930 | Alive | . | . | 15 | 19 |
| 41 | 58.590 | Alive | . | . | 15 | 18 |
| 42 | 61.510 | Alive | . | . | 15 | 17 |
| 43 | 62.400 | Alive | . | . | 15 | 16 |
| 44 | 67.830 | Alive | . | . | 15 | 15 |
| 45 | 72.340 | Alive | . | . | 15 | 14 |
| 46 | 72.370 | Alive | . | . | 15 | 13 |
| 47 | 76.450 | Alive | . | . | 15 | 12 |
| 48 | 78.850 | Alive | . | . | 15 | 11 |
| 49 | 79.800 | Alive | . | . | 15 | 10 |
| 50 | 80.000 | Alive | . | . | 15 | 9 |
| 51 | 80.890 | Alive | . | . | 15 | 8 |
| 52 | 81.090 | Alive | . | . | 15 | 7 |
| 53 | 87.200 | Alive | . | . | 15 | 6 |
| 54 | 88.130 | Alive | . | . | 15 | 5 |
| 55 | 90.000 | Alive | . | . | 15 | 4 |
| 56 | 92.430 | Alive | . | . | 15 | 3 |
| 57 | 97.140 | Alive | . | . | 15 | 2 |
| 58 | 98.590 | Alive | . | . | 15 | 1 |
| 59 | 98.820 | Alive | . | . | 15 | 0 |
| Bad | 1 | .100 | Died | .996 | .004 | 1 | 271 |
| 2 | .330 | Died | .993 | .005 | 2 | 270 |
| 3 | .460 | Died | . | . | 3 | 269 |
| 4 | .460 | Died | .985 | .007 | 4 | 268 |
| 5 | .490 | Died | . | . | 5 | 267 |
| 6 | .490 | Died | .978 | .009 | 6 | 266 |
| 7 | .530 | Died | .974 | .010 | 7 | 265 |
| 8 | .560 | Died | . | . | 8 | 264 |
| 9 | .560 | Died | . | . | 9 | 263 |
| 10 | .560 | Died | . | . | 10 | 262 |
| 11 | .560 | Died | .960 | .012 | 11 | 261 |
| 12 | .630 | Died | . | . | 12 | 260 |
| 13 | .630 | Died | . | . | 13 | 259 |
| 14 | .630 | Died | . | . | 14 | 258 |
| 15 | .630 | Died | .945 | .014 | 15 | 257 |
| 16 | .690 | Died | .941 | .014 | 16 | 256 |
| 17 | .720 | Died | . | . | 17 | 255 |
| 18 | .720 | Died | .934 | .015 | 18 | 254 |
| 19 | .760 | Died | . | . | 19 | 253 |
| 20 | .760 | Died | .926 | .016 | 20 | 252 |
| 21 | .790 | Died | . | . | 21 | 251 |
| 22 | .790 | Died | .919 | .017 | 22 | 250 |
| 23 | .860 | Died | .915 | .017 | 23 | 249 |
| 24 | .890 | Died | . | . | 24 | 248 |
| 25 | .890 | Died | .908 | .018 | 25 | 247 |
| 26 | .920 | Died | .904 | .018 | 26 | 246 |
| 27 | .950 | Died | . | . | 27 | 245 |
| 28 | .950 | Died | .897 | .018 | 28 | 244 |
| 29 | 1.020 | Died | .893 | .019 | 29 | 243 |
| 30 | 1.120 | Died | .890 | .019 | 30 | 242 |
| 31 | 1.480 | Alive | . | . | 30 | 241 |
| 32 | 3.850 | Died | .886 | .019 | 31 | 240 |
| 33 | 4.570 | Died | .882 | .020 | 32 | 239 |
| 34 | 4.740 | Died | .879 | .020 | 33 | 238 |
| 35 | 4.970 | Died | .875 | .020 | 34 | 237 |
| 36 | 5.390 | Died | .871 | .020 | 35 | 236 |
| 37 | 5.760 | Died | .868 | .021 | 36 | 235 |
| 38 | 6.120 | Died | .864 | .021 | 37 | 234 |
| 39 | 6.410 | Died | .860 | .021 | 38 | 233 |
| 40 | 6.510 | Died | .856 | .021 | 39 | 232 |
| 41 | 7.990 | Died | .853 | .021 | 40 | 231 |
| 42 | 8.420 | Died | .849 | .022 | 41 | 230 |
| 43 | 8.590 | Died | .845 | .022 | 42 | 229 |
| 44 | 9.540 | Died | .842 | .022 | 43 | 228 |
| 45 | 11.380 | Died | .838 | .022 | 44 | 227 |
| 46 | 11.510 | Died | .834 | .023 | 45 | 226 |
| 47 | 11.680 | Died | .831 | .023 | 46 | 225 |
| 48 | 12.200 | Died | .827 | .023 | 47 | 224 |
| 49 | 13.060 | Died | .823 | .023 | 48 | 223 |
| 50 | 13.390 | Died | . | . | 49 | 222 |
| 51 | 13.390 | Died | .816 | .024 | 50 | 221 |
| 52 | 14.310 | Died | .812 | .024 | 51 | 220 |
| 53 | 15.230 | Died | .808 | .024 | 52 | 219 |
| 54 | 16.280 | Died | .805 | .024 | 53 | 218 |
| 55 | 16.680 | Died | .801 | .024 | 54 | 217 |
| 56 | 17.240 | Died | .797 | .024 | 55 | 216 |
| 57 | 17.340 | Died | .794 | .025 | 56 | 215 |
| 58 | 19.970 | Alive | . | . | 56 | 214 |
| 59 | 20.000 | Died | .790 | .025 | 57 | 213 |
| 60 | 21.680 | Died | .786 | .025 | 58 | 212 |
| 61 | 21.910 | Died | .783 | .025 | 59 | 211 |
| 62 | 22.240 | Died | .779 | .025 | 60 | 210 |
| 63 | 22.470 | Died | .775 | .025 | 61 | 209 |
| 64 | 24.310 | Died | .771 | .025 | 62 | 208 |
| 65 | 25.200 | Died | .768 | .026 | 63 | 207 |
| 66 | 25.300 | Died | .764 | .026 | 64 | 206 |
| 67 | 27.830 | Died | .760 | .026 | 65 | 205 |
| 68 | 29.570 | Died | .757 | .026 | 66 | 204 |
| 69 | 30.230 | Died | .753 | .026 | 67 | 203 |
| 70 | 31.150 | Died | .749 | .026 | 68 | 202 |
| 71 | 32.700 | Died | .746 | .026 | 69 | 201 |
| 72 | 34.280 | Died | .742 | .027 | 70 | 200 |
| 73 | 35.390 | Alive | . | . | 70 | 199 |
| 74 | 37.600 | Alive | . | . | 70 | 198 |
| 75 | 37.600 | Alive | . | . | 70 | 197 |
| 76 | 37.630 | Alive | . | . | 70 | 196 |
| 77 | 37.660 | Died | .738 | .027 | 71 | 195 |
| 78 | 37.760 | Alive | . | . | 71 | 194 |
| 79 | 37.830 | Alive | . | . | 71 | 193 |
| 80 | 37.860 | Alive | . | . | 71 | 192 |
| 81 | 38.390 | Died | .734 | .027 | 72 | 191 |
| 82 | 38.390 | Alive | . | . | 72 | 190 |
| 83 | 38.750 | Alive | . | . | 72 | 189 |
| 84 | 39.050 | Alive | . | . | 72 | 188 |
| 85 | 39.210 | Died | .730 | .027 | 73 | 187 |
| 86 | 39.210 | Alive | . | . | 73 | 186 |
| 87 | 39.210 | Alive | . | . | 73 | 185 |
| 88 | 39.240 | Alive | . | . | 73 | 184 |
| 89 | 39.340 | Alive | . | . | 73 | 183 |
| 90 | 39.510 | Alive | . | . | 73 | 182 |
| 91 | 39.570 | Alive | . | . | 73 | 181 |
| 92 | 39.740 | Alive | . | . | 73 | 180 |
| 93 | 39.800 | Alive | . | . | 73 | 179 |
| 94 | 39.970 | Alive | . | . | 73 | 178 |
| 95 | 40.200 | Alive | . | . | 73 | 177 |
| 96 | 40.430 | Alive | . | . | 73 | 176 |
| 97 | 40.660 | Alive | . | . | 73 | 175 |
| 98 | 41.380 | Alive | . | . | 73 | 174 |
| 99 | 41.680 | Alive | . | . | 73 | 173 |
| 100 | 41.680 | Alive | . | . | 73 | 172 |
| 101 | 41.710 | Alive | . | . | 73 | 171 |
| 102 | 41.740 | Alive | . | . | 73 | 170 |
| 103 | 41.970 | Died | .726 | .027 | 74 | 169 |
| 104 | 41.970 | Alive | . | . | 74 | 168 |
| 105 | 42.270 | Alive | . | . | 74 | 167 |
| 106 | 42.500 | Alive | . | . | 74 | 166 |
| 107 | 42.700 | Died | .722 | .027 | 75 | 165 |
| 108 | 43.130 | Alive | . | . | 75 | 164 |
| 109 | 43.390 | Alive | . | . | 75 | 163 |
| 110 | 43.420 | Alive | . | . | 75 | 162 |
| 111 | 43.490 | Alive | . | . | 75 | 161 |
| 112 | 43.590 | Alive | . | . | 75 | 160 |
| 113 | 43.650 | Alive | . | . | 75 | 159 |
| 114 | 43.980 | Alive | . | . | 75 | 158 |
| 115 | 44.080 | Alive | . | . | 75 | 157 |
| 116 | 44.740 | Alive | . | . | 75 | 156 |
| 117 | 45.430 | Alive | . | . | 75 | 155 |
| 118 | 45.590 | Alive | . | . | 75 | 154 |
| 119 | 45.790 | Alive | . | . | 75 | 153 |
| 120 | 46.050 | Alive | . | . | 75 | 152 |
| 121 | 46.120 | Alive | . | . | 75 | 151 |
| 122 | 46.180 | Alive | . | . | 75 | 150 |
| 123 | 46.580 | Alive | . | . | 75 | 149 |
| 124 | 46.740 | Died | .717 | .028 | 76 | 148 |
| 125 | 46.780 | Alive | . | . | 76 | 147 |
| 126 | 46.910 | Died | .712 | .028 | 77 | 146 |
| 127 | 47.270 | Alive | . | . | 77 | 145 |
| 128 | 47.300 | Alive | . | . | 77 | 144 |
| 129 | 47.500 | Alive | . | . | 77 | 143 |
| 130 | 47.760 | Alive | . | . | 77 | 142 |
| 131 | 47.830 | Alive | . | . | 77 | 141 |
| 132 | 48.030 | Alive | . | . | 77 | 140 |
| 133 | 48.190 | Alive | . | . | 77 | 139 |
| 134 | 48.450 | Alive | . | . | 77 | 138 |
| 135 | 48.550 | Died | .707 | .028 | 78 | 137 |
| 136 | 48.650 | Alive | . | . | 78 | 136 |
| 137 | 49.010 | Died | .702 | .028 | 79 | 135 |
| 138 | 49.180 | Alive | . | . | 79 | 134 |
| 139 | 49.240 | Alive | . | . | 79 | 133 |
| 140 | 49.310 | Alive | . | . | 79 | 132 |
| 141 | 49.670 | Alive | . | . | 79 | 131 |
| 142 | 49.800 | Alive | . | . | 79 | 130 |
| 143 | 49.840 | Alive | . | . | 79 | 129 |
| 144 | 49.930 | Alive | . | . | 79 | 128 |
| 145 | 50.000 | Alive | . | . | 79 | 127 |
| 146 | 50.430 | Alive | . | . | 79 | 126 |
| 147 | 50.630 | Alive | . | . | 79 | 125 |
| 148 | 50.720 | Alive | . | . | 79 | 124 |
| 149 | 51.220 | Alive | . | . | 79 | 123 |
| 150 | 51.280 | Alive | . | . | 79 | 122 |
| 151 | 51.320 | Alive | . | . | 79 | 121 |
| 152 | 51.410 | Alive | . | . | 79 | 120 |
| 153 | 51.880 | Alive | . | . | 79 | 119 |
| 154 | 52.270 | Alive | . | . | 79 | 118 |
| 155 | 52.300 | Alive | . | . | 79 | 117 |
| 156 | 52.570 | Alive | . | . | 79 | 116 |
| 157 | 53.060 | Died | **.695** | .029 | 80 | 115 |
| 158 | 53.090 | Alive | . | . | 80 | 114 |
| 159 | 54.440 | Alive | . | . | 80 | 113 |
| 160 | 54.540 | Alive | . | . | 80 | 112 |
| 161 | 54.930 | Alive | . | . | 80 | 111 |
| 162 | 55.100 | Alive | . | . | 80 | 110 |
| 163 | 55.130 | Alive | . | . | 80 | 109 |
| 164 | 55.200 | Alive | . | . | 80 | 108 |
| 165 | 55.530 | Alive | . | . | 80 | 107 |
| 166 | 55.920 | Alive | . | . | 80 | 106 |
| 167 | 55.990 | Alive | . | . | 80 | 105 |
| 168 | 56.020 | Alive | . | . | 80 | 104 |
| 169 | 56.280 | Alive | . | . | 80 | 103 |
| 170 | 56.510 | Alive | . | . | 80 | 102 |
| 171 | 57.040 | Alive | . | . | 80 | 101 |
| 172 | 57.070 | Alive | . | . | 80 | 100 |
| 173 | 57.270 | Alive | . | . | 80 | 99 |
| 174 | 57.430 | Alive | . | . | 80 | 98 |
| 175 | 57.700 | Alive | . | . | 80 | 97 |
| 176 | 58.060 | Alive | . | . | 80 | 96 |
| 177 | 58.260 | Alive | . | . | 80 | 95 |
| 178 | 58.290 | Alive | . | . | 80 | 94 |
| 179 | 59.050 | Alive | . | . | 80 | 93 |
| 180 | 59.110 | Alive | . | . | 80 | 92 |
| 181 | 59.140 | Alive | . | . | 80 | 91 |
| 182 | 59.240 | Alive | . | . | 80 | 90 |
| 183 | 59.240 | Alive | . | . | 80 | 89 |
| 184 | 59.410 | Alive | . | . | 80 | 88 |
| 185 | 59.510 | Alive | . | . | 80 | 87 |
| 186 | 60.200 | Alive | . | . | 80 | 86 |
| 187 | 60.360 | Alive | . | . | 80 | 85 |
| 188 | 60.530 | Alive | . | . | 80 | 84 |
| 189 | 60.790 | Alive | . | . | 80 | 83 |
| 190 | 61.020 | Alive | . | . | 80 | 82 |
| 191 | 61.220 | Alive | . | . | 80 | 81 |
| 192 | 61.250 | Died | .687 | .030 | 81 | 80 |
| 193 | 61.840 | Alive | . | . | 81 | 79 |
| 194 | 61.840 | Alive | . | . | 81 | 78 |
| 195 | 61.840 | Alive | . | . | 81 | 77 |
| 196 | 62.140 | Alive | . | . | 81 | 76 |
| 197 | 62.140 | Alive | . | . | 81 | 75 |
| 198 | 62.800 | Alive | . | . | 81 | 74 |
| 199 | 62.800 | Alive | . | . | 81 | 73 |
| 200 | 63.060 | Alive | . | . | 81 | 72 |
| 201 | 63.320 | Alive | . | . | 81 | 71 |
| 202 | 63.590 | Alive | . | . | 81 | 70 |
| 203 | 63.850 | Alive | . | . | 81 | 69 |
| 204 | 63.910 | Died | .677 | .031 | 82 | 68 |
| 205 | 64.510 | Alive | . | . | 82 | 67 |
| 206 | 64.640 | Alive | . | . | 82 | 66 |
| 207 | 64.800 | Alive | . | . | 82 | 65 |
| 208 | 64.900 | Alive | . | . | 82 | 64 |
| 209 | 65.330 | Alive | . | . | 82 | 63 |
| 210 | 65.560 | Alive | . | . | 82 | 62 |
| 211 | 66.090 | Alive | . | . | 82 | 61 |
| 212 | 66.280 | Alive | . | . | 82 | 60 |
| 213 | 67.040 | Alive | . | . | 82 | 59 |
| 214 | 67.340 | Alive | . | . | 82 | 58 |
| 215 | 68.090 | Alive | . | . | 82 | 57 |
| 216 | 68.850 | Alive | . | . | 82 | 56 |
| 217 | 68.850 | Alive | . | . | 82 | 55 |
| 218 | 69.240 | Alive | . | . | 82 | 54 |
| 219 | 69.570 | Alive | . | . | 82 | 53 |
| 220 | 69.700 | Alive | . | . | 82 | 52 |
| 221 | 70.390 | Alive | . | . | 82 | 51 |
| 222 | 70.590 | Alive | . | . | 82 | 50 |
| 223 | 71.320 | Alive | . | . | 82 | 49 |
| 224 | 71.380 | Alive | . | . | 82 | 48 |
| 225 | 71.710 | Died | .663 | .033 | 83 | 47 |
| 226 | 73.030 | Alive | . | . | 83 | 46 |
| 227 | 73.060 | Alive | . | . | 83 | 45 |
| 228 | 73.910 | Alive | . | . | 83 | 44 |
| 229 | 74.080 | Died | .648 | .036 | 84 | 43 |
| 230 | 74.110 | Alive | . | . | 84 | 42 |
| 231 | 74.640 | Alive | . | . | 84 | 41 |
| 232 | 75.160 | Alive | . | . | 84 | 40 |
| 233 | 75.720 | Alive | . | . | 84 | 39 |
| 234 | 75.820 | Alive | . | . | 84 | 38 |
| 235 | 75.920 | Alive | . | . | 84 | 37 |
| 236 | 76.150 | Alive | . | . | 84 | 36 |
| 237 | 76.250 | Alive | . | . | 84 | 35 |
| 238 | 76.640 | Alive | . | . | 84 | 34 |
| 239 | 79.840 | Alive | . | . | 84 | 33 |
| 240 | 79.870 | Alive | . | . | 84 | 32 |
| 241 | 80.100 | Alive | . | . | 84 | 31 |
| 242 | 80.950 | Alive | . | . | 84 | 30 |
| 243 | 81.780 | Alive | . | . | 84 | 29 |
| 244 | 81.970 | Died | .625 | .041 | 85 | 28 |
| 245 | 82.760 | Alive | . | . | 85 | 27 |
| 246 | 83.160 | Alive | . | . | 85 | 26 |
| 247 | 85.260 | Alive | . | . | 85 | 25 |
| 248 | 85.890 | Alive | . | . | 85 | 24 |
| 249 | 86.640 | Alive | . | . | 85 | 23 |
| 250 | 87.630 | Alive | . | . | 85 | 22 |
| 251 | 88.190 | Alive | . | . | 85 | 21 |
| 252 | 88.220 | Alive | . | . | 85 | 20 |
| 253 | 88.720 | Alive | . | . | 85 | 19 |
| 254 | 88.720 | Alive | . | . | 85 | 18 |
| 255 | 89.050 | Alive | . | . | 85 | 17 |
| 256 | 89.080 | Alive | . | . | 85 | 16 |
| 257 | 90.820 | Alive | . | . | 85 | 15 |
| 258 | 91.220 | Alive | . | . | 85 | 14 |
| 259 | 91.380 | Alive | . | . | 85 | 13 |
| 260 | 91.510 | Alive | . | . | 85 | 12 |
| 261 | 92.730 | Alive | . | . | 85 | 11 |
| 262 | 94.340 | Alive | . | . | 85 | 10 |
| 263 | 95.230 | Alive | . | . | 85 | 9 |
| 264 | 95.720 | Alive | . | . | 85 | 8 |
| 265 | 96.250 | Alive | . | . | 85 | 7 |
| 266 | 97.040 | Alive | . | . | 85 | 6 |
| 267 | 97.170 | Alive | . | . | 85 | 5 |
| 268 | 98.130 | Alive | . | . | 85 | 4 |
| 269 | 99.900 | Alive | . | . | 85 | 3 |
| 270 | 100.660 | Alive | . | . | 85 | 2 |
| 271 | 102.400 | Alive | . | . | 85 | 1 |
| 272 | 104.050 | Alive | . | . | 85 | 0 |

| **Overall Comparisons** | | | |
| --- | --- | --- | --- |
|  | Chi-Square | df | P-value |
| Log Rank (Mantel-Cox) | .708 | 1 | **.400** |
| DNA.Index. | | | |


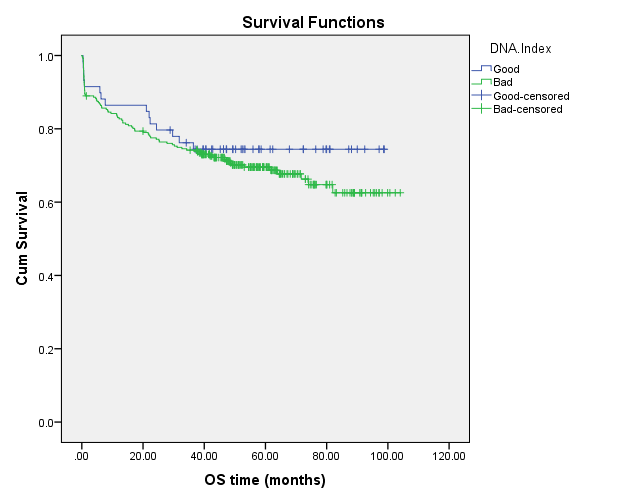


**Kaplan-Meier**

| **Case Processing Summary** | | | | |
| --- | --- | --- | --- | --- |
| Molecular | Total N | N of Events | Censored | |
| N | Percent |
| Negative | **243** | **80** | 163 | 67.1% |
| Positive | **82** | **19** | 63 | 76.8% |
| Overall | 325 | 99 | 226 | 69.5% |

| **Survival Table** | | | | | | | |
| --- | --- | --- | --- | --- | --- | --- | --- |
| Molecular | | Time | Status | Cumulative Proportion Surviving at the Time | | N of Cumulative Events | N of Remaining Cases |
| Estimate | Std. Error |
| Negative | 1 | .100 | Died | .996 | .004 | 1 | 242 |
| 2 | .330 | Died | .992 | .006 | 2 | 241 |
| 3 | .390 | Died | .988 | .007 | 3 | 240 |
| 4 | .460 | Died | . | . | 4 | 239 |
| 5 | .460 | Died | .979 | .009 | 5 | 238 |
| 6 | .490 | Died | . | . | 6 | 237 |
| 7 | .490 | Died | .971 | .011 | 7 | 236 |
| 8 | .530 | Died | .967 | .011 | 8 | 235 |
| 9 | .560 | Died | . | . | 9 | 234 |
| 10 | .560 | Died | . | . | 10 | 233 |
| 11 | .560 | Died | . | . | 11 | 232 |
| 12 | .560 | Died | .951 | .014 | 12 | 231 |
| 13 | .590 | Died | .947 | .014 | 13 | 230 |
| 14 | .630 | Died | . | . | 14 | 229 |
| 15 | .630 | Died | . | . | 15 | 228 |
| 16 | .630 | Died | . | . | 16 | 227 |
| 17 | .630 | Died | .930 | .016 | 17 | 226 |
| 18 | .720 | Died | . | . | 18 | 225 |
| 19 | .720 | Died | .922 | .017 | 19 | 224 |
| 20 | .760 | Died | . | . | 20 | 223 |
| 21 | .760 | Died | .914 | .018 | 21 | 222 |
| 22 | .790 | Died | . | . | 22 | 221 |
| 23 | .790 | Died | .905 | .019 | 23 | 220 |
| 24 | .820 | Died | .901 | .019 | 24 | 219 |
| 25 | .860 | Died | .897 | .019 | 25 | 218 |
| 26 | .890 | Died | .893 | .020 | 26 | 217 |
| 27 | .950 | Died | . | . | 27 | 216 |
| 28 | .950 | Died | .885 | .020 | 28 | 215 |
| 29 | 1.020 | Died | .881 | .021 | 29 | 214 |
| 30 | 1.120 | Died | .877 | .021 | 30 | 213 |
| 31 | 4.570 | Died | .872 | .021 | 31 | 212 |
| 32 | 5.390 | Died | .868 | .022 | 32 | 211 |
| 33 | 5.890 | Died | .864 | .022 | 33 | 210 |
| 34 | 6.120 | Died | .860 | .022 | 34 | 209 |
| 35 | 6.250 | Died | .856 | .023 | 35 | 208 |
| 36 | 6.410 | Died | .852 | .023 | 36 | 207 |
| 37 | 6.510 | Died | .848 | .023 | 37 | 206 |
| 38 | 7.660 | Died | .844 | .023 | 38 | 205 |
| 39 | 7.990 | Died | .840 | .024 | 39 | 204 |
| 40 | 8.420 | Died | .835 | .024 | 40 | 203 |
| 41 | 8.590 | Died | .831 | .024 | 41 | 202 |
| 42 | 11.510 | Died | .827 | .024 | 42 | 201 |
| 43 | 11.680 | Died | .823 | .024 | 43 | 200 |
| 44 | 12.200 | Died | .819 | .025 | 44 | 199 |
| 45 | 13.060 | Died | .815 | .025 | 45 | 198 |
| 46 | 13.390 | Died | . | . | 46 | 197 |
| 47 | 13.390 | Died | .807 | .025 | 47 | 196 |
| 48 | 15.230 | Died | .802 | .026 | 48 | 195 |
| 49 | 16.280 | Died | .798 | .026 | 49 | 194 |
| 50 | 16.680 | Died | .794 | .026 | 50 | 193 |
| 51 | 17.240 | Died | .790 | .026 | 51 | 192 |
| 52 | 19.970 | Alive | . | . | 51 | 191 |
| 53 | 20.000 | Died | .786 | .026 | 52 | 190 |
| 54 | 21.680 | Died | .782 | .026 | 53 | 189 |
| 55 | 21.910 | Died | .778 | .027 | 54 | 188 |
| 56 | 21.970 | Died | .774 | .027 | 55 | 187 |
| 57 | 22.240 | Died | .769 | .027 | 56 | 186 |
| 58 | 22.300 | Died | .765 | .027 | 57 | 185 |
| 59 | 22.470 | Died | .761 | .027 | 58 | 184 |
| 60 | 24.310 | Died | .757 | .028 | 59 | 183 |
| 61 | 24.410 | Died | .753 | .028 | 60 | 182 |
| 62 | 25.200 | Died | .749 | .028 | 61 | 181 |
| 63 | 27.830 | Died | .745 | .028 | 62 | 180 |
| 64 | 28.850 | Alive | . | . | 62 | 179 |
| 65 | 29.570 | Died | .740 | .028 | 63 | 178 |
| 66 | 29.670 | Died | .736 | .028 | 64 | 177 |
| 67 | 32.700 | Died | .732 | .028 | 65 | 176 |
| 68 | 34.140 | Alive | . | . | 65 | 175 |
| 69 | 34.280 | Died | .728 | .029 | 66 | 174 |
| 70 | 35.390 | Alive | . | . | 66 | 173 |
| 71 | 36.450 | Died | .724 | .029 | 67 | 172 |
| 72 | 37.630 | Alive | . | . | 67 | 171 |
| 73 | 37.660 | Died | .720 | .029 | 68 | 170 |
| 74 | 37.660 | Alive | . | . | 68 | 169 |
| 75 | 37.830 | Alive | . | . | 68 | 168 |
| 76 | 38.390 | Alive | . | . | 68 | 167 |
| 77 | 38.750 | Alive | . | . | 68 | 166 |
| 78 | 39.210 | Died | .715 | .029 | 69 | 165 |
| 79 | 39.210 | Alive | . | . | 69 | 164 |
| 80 | 39.210 | Alive | . | . | 69 | 163 |
| 81 | 39.240 | Alive | . | . | 69 | 162 |
| 82 | 39.340 | Alive | . | . | 69 | 161 |
| 83 | 39.510 | Alive | . | . | 69 | 160 |
| 84 | 39.570 | Alive | . | . | 69 | 159 |
| 85 | 39.570 | Alive | . | . | 69 | 158 |
| 86 | 39.700 | Alive | . | . | 69 | 157 |
| 87 | 39.740 | Alive | . | . | 69 | 156 |
| 88 | 39.800 | Alive | . | . | 69 | 155 |
| 89 | 39.970 | Alive | . | . | 69 | 154 |
| 90 | 40.430 | Alive | . | . | 69 | 153 |
| 91 | 40.490 | Alive | . | . | 69 | 152 |
| 92 | 40.590 | Alive | . | . | 69 | 151 |
| 93 | 40.660 | Alive | . | . | 69 | 150 |
| 94 | 41.380 | Alive | . | . | 69 | 149 |
| 95 | 41.710 | Alive | . | . | 69 | 148 |
| 96 | 41.740 | Alive | . | . | 69 | 147 |
| 97 | 41.970 | Died | .710 | .029 | 70 | 146 |
| 98 | 41.970 | Alive | . | . | 70 | 145 |
| 99 | 42.430 | Alive | . | . | 70 | 144 |
| 100 | 42.700 | Died | .705 | .029 | 71 | 143 |
| 101 | 42.760 | Alive | . | . | 71 | 142 |
| 102 | 43.130 | Alive | . | . | 71 | 141 |
| 103 | 43.390 | Alive | . | . | 71 | 140 |
| 104 | 43.420 | Alive | . | . | 71 | 139 |
| 105 | 43.490 | Alive | . | . | 71 | 138 |
| 106 | 43.590 | Alive | . | . | 71 | 137 |
| 107 | 43.650 | Alive | . | . | 71 | 136 |
| 108 | 44.080 | Alive | . | . | 71 | 135 |
| 109 | 45.230 | Alive | . | . | 71 | 134 |
| 110 | 45.430 | Alive | . | . | 71 | 133 |
| 111 | 45.590 | Alive | . | . | 71 | 132 |
| 112 | 46.050 | Alive | . | . | 71 | 131 |
| 113 | 46.120 | Alive | . | . | 71 | 130 |
| 114 | 46.180 | Alive | . | . | 71 | 129 |
| 115 | 46.280 | Alive | . | . | 71 | 128 |
| 116 | 46.280 | Alive | . | . | 71 | 127 |
| 117 | 46.580 | Alive | . | . | 71 | 126 |
| 118 | 46.740 | Died | .700 | .030 | 72 | 125 |
| 119 | 46.780 | Alive | . | . | 72 | 124 |
| 120 | 46.910 | Died | .694 | .030 | 73 | 123 |
| 121 | 47.170 | Alive | . | . | 73 | 122 |
| 122 | 47.270 | Alive | . | . | 73 | 121 |
| 123 | 47.300 | Alive | . | . | 73 | 120 |
| 124 | 47.300 | Alive | . | . | 73 | 119 |
| 125 | 47.500 | Alive | . | . | 73 | 118 |
| 126 | 48.030 | Alive | . | . | 73 | 117 |
| 127 | 48.190 | Alive | . | . | 73 | 116 |
| 128 | 48.450 | Alive | . | . | 73 | 115 |
| 129 | 48.550 | Died | .688 | .030 | 74 | 114 |
| 130 | 48.650 | Alive | . | . | 74 | 113 |
| 131 | 49.010 | Died | .682 | .031 | 75 | 112 |
| 132 | 49.180 | Alive | . | . | 75 | 111 |
| 133 | 49.280 | Alive | . | . | 75 | 110 |
| 134 | 49.310 | Alive | . | . | 75 | 109 |
| 135 | 49.410 | Alive | . | . | 75 | 108 |
| 136 | 50.000 | Alive | . | . | 75 | 107 |
| 137 | 50.430 | Alive | . | . | 75 | 106 |
| 138 | 50.630 | Alive | . | . | 75 | 105 |
| 139 | 50.720 | Alive | . | . | 75 | 104 |
| 140 | 51.220 | Alive | . | . | 75 | 103 |
| 141 | 51.280 | Alive | . | . | 75 | 102 |
| 142 | 51.320 | Alive | . | . | 75 | 101 |
| 143 | 51.880 | Alive | . | . | 75 | 100 |
| 144 | 52.040 | Alive | . | . | 75 | 99 |
| 145 | 52.270 | Alive | . | . | 75 | 98 |
| 146 | 52.300 | Alive | . | . | 75 | 97 |
| 147 | 52.430 | Alive | . | . | 75 | 96 |
| 148 | 52.990 | Alive | . | . | 75 | 95 |
| 149 | 53.060 | Died | **.675** | .031 | 76 | 94 |
| 150 | 53.090 | Alive | . | . | 76 | 93 |
| 151 | 53.320 | Alive | . | . | 76 | 92 |
| 152 | 54.440 | Alive | . | . | 76 | 91 |
| 153 | 54.930 | Alive | . | . | 76 | 90 |
| 154 | 55.130 | Alive | . | . | 76 | 89 |
| 155 | 55.530 | Alive | . | . | 76 | 88 |
| 156 | 55.920 | Alive | . | . | 76 | 87 |
| 157 | 55.920 | Alive | . | . | 76 | 86 |
| 158 | 55.990 | Alive | . | . | 76 | 85 |
| 159 | 56.510 | Alive | . | . | 76 | 84 |
| 160 | 57.040 | Alive | . | . | 76 | 83 |
| 161 | 57.430 | Alive | . | . | 76 | 82 |
| 162 | 57.800 | Alive | . | . | 76 | 81 |
| 163 | 57.930 | Alive | . | . | 76 | 80 |
| 164 | 58.060 | Alive | . | . | 76 | 79 |
| 165 | 58.290 | Alive | . | . | 76 | 78 |
| 166 | 58.590 | Alive | . | . | 76 | 77 |
| 167 | 59.050 | Alive | . | . | 76 | 76 |
| 168 | 59.110 | Alive | . | . | 76 | 75 |
| 169 | 59.140 | Alive | . | . | 76 | 74 |
| 170 | 59.240 | Alive | . | . | 76 | 73 |
| 171 | 59.240 | Alive | . | . | 76 | 72 |
| 172 | 59.410 | Alive | . | . | 76 | 71 |
| 173 | 59.510 | Alive | . | . | 76 | 70 |
| 174 | 60.360 | Alive | . | . | 76 | 69 |
| 175 | 60.530 | Alive | . | . | 76 | 68 |
| 176 | 60.790 | Alive | . | . | 76 | 67 |
| 177 | 61.020 | Alive | . | . | 76 | 66 |
| 178 | 61.250 | Died | .665 | .032 | 77 | 65 |
| 179 | 61.510 | Alive | . | . | 77 | 64 |
| 180 | 61.840 | Alive | . | . | 77 | 63 |
| 181 | 61.840 | Alive | . | . | 77 | 62 |
| 182 | 62.140 | Alive | . | . | 77 | 61 |
| 183 | 62.140 | Alive | . | . | 77 | 60 |
| 184 | 62.400 | Alive | . | . | 77 | 59 |
| 185 | 63.320 | Alive | . | . | 77 | 58 |
| 186 | 63.590 | Alive | . | . | 77 | 57 |
| 187 | 63.910 | Died | .653 | .034 | 78 | 56 |
| 188 | 64.510 | Alive | . | . | 78 | 55 |
| 189 | 64.640 | Alive | . | . | 78 | 54 |
| 190 | 64.800 | Alive | . | . | 78 | 53 |
| 191 | 64.900 | Alive | . | . | 78 | 52 |
| 192 | 65.330 | Alive | . | . | 78 | 51 |
| 193 | 65.560 | Alive | . | . | 78 | 50 |
| 194 | 67.040 | Alive | . | . | 78 | 49 |
| 195 | 67.340 | Alive | . | . | 78 | 48 |
| 196 | 67.830 | Alive | . | . | 78 | 47 |
| 197 | 68.850 | Alive | . | . | 78 | 46 |
| 198 | 69.240 | Alive | . | . | 78 | 45 |
| 199 | 69.570 | Alive | . | . | 78 | 44 |
| 200 | 69.700 | Alive | . | . | 78 | 43 |
| 201 | 70.390 | Alive | . | . | 78 | 42 |
| 202 | 71.320 | Alive | . | . | 78 | 41 |
| 203 | 71.380 | Alive | . | . | 78 | 40 |
| 204 | 71.710 | Died | .637 | .037 | 79 | 39 |
| 205 | 72.340 | Alive | . | . | 79 | 38 |
| 206 | 72.370 | Alive | . | . | 79 | 37 |
| 207 | 73.060 | Alive | . | . | 79 | 36 |
| 208 | 74.110 | Alive | . | . | 79 | 35 |
| 209 | 75.160 | Alive | . | . | 79 | 34 |
| 210 | 75.720 | Alive | . | . | 79 | 33 |
| 211 | 76.250 | Alive | . | . | 79 | 32 |
| 212 | 76.450 | Alive | . | . | 79 | 31 |
| 213 | 76.640 | Alive | . | . | 79 | 30 |
| 214 | 78.850 | Alive | . | . | 79 | 29 |
| 215 | 79.800 | Alive | . | . | 79 | 28 |
| 216 | 80.000 | Alive | . | . | 79 | 27 |
| 217 | 80.100 | Alive | . | . | 79 | 26 |
| 218 | 80.890 | Alive | . | . | 79 | 25 |
| 219 | 80.950 | Alive | . | . | 79 | 24 |
| 220 | 81.970 | Died | .610 | .044 | 80 | 23 |
| 221 | 83.160 | Alive | . | . | 80 | 22 |
| 222 | 85.890 | Alive | . | . | 80 | 21 |
| 223 | 86.640 | Alive | . | . | 80 | 20 |
| 224 | 87.200 | Alive | . | . | 80 | 19 |
| 225 | 88.130 | Alive | . | . | 80 | 18 |
| 226 | 88.190 | Alive | . | . | 80 | 17 |
| 227 | 88.220 | Alive | . | . | 80 | 16 |
| 228 | 89.050 | Alive | . | . | 80 | 15 |
| 229 | 90.000 | Alive | . | . | 80 | 14 |
| 230 | 91.380 | Alive | . | . | 80 | 13 |
| 231 | 91.510 | Alive | . | . | 80 | 12 |
| 232 | 92.430 | Alive | . | . | 80 | 11 |
| 233 | 92.730 | Alive | . | . | 80 | 10 |
| 234 | 94.340 | Alive | . | . | 80 | 9 |
| 235 | 95.230 | Alive | . | . | 80 | 8 |
| 236 | 95.720 | Alive | . | . | 80 | 7 |
| 237 | 96.250 | Alive | . | . | 80 | 6 |
| 238 | 97.040 | Alive | . | . | 80 | 5 |
| 239 | 97.140 | Alive | . | . | 80 | 4 |
| 240 | 98.130 | Alive | . | . | 80 | 3 |
| 241 | 98.820 | Alive | . | . | 80 | 2 |
| 242 | 99.900 | Alive | . | . | 80 | 1 |
| 243 | 104.050 | Alive | . | . | 80 | 0 |
| Positive | 1 | .460 | Died | .988 | .012 | 1 | 81 |
| 2 | .630 | Died | .976 | .017 | 2 | 80 |
| 3 | .690 | Died | .963 | .021 | 3 | 79 |
| 4 | .890 | Died | .951 | .024 | 4 | 78 |
| 5 | .920 | Died | .939 | .026 | 5 | 77 |
| 6 | 1.480 | Alive | . | . | 5 | 76 |
| 7 | 3.850 | Died | .927 | .029 | 6 | 75 |
| 8 | 4.740 | Died | .914 | .031 | 7 | 74 |
| 9 | 4.970 | Died | .902 | .033 | 8 | 73 |
| 10 | 5.760 | Died | .890 | .035 | 9 | 72 |
| 11 | 9.540 | Died | .877 | .036 | 10 | 71 |
| 12 | 11.380 | Died | .865 | .038 | 11 | 70 |
| 13 | 14.310 | Died | .853 | .039 | 12 | 69 |
| 14 | 17.340 | Died | .840 | .041 | 13 | 68 |
| 15 | 25.300 | Died | .828 | .042 | 14 | 67 |
| 16 | 30.230 | Died | .815 | .043 | 15 | 66 |
| 17 | 31.150 | Died | .803 | .044 | 16 | 65 |
| 18 | 31.840 | Died | .791 | .045 | 17 | 64 |
| 19 | 37.010 | Alive | . | . | 17 | 63 |
| 20 | 37.600 | Alive | . | . | 17 | 62 |
| 21 | 37.600 | Alive | . | . | 17 | 61 |
| 22 | 37.760 | Alive | . | . | 17 | 60 |
| 23 | 37.860 | Alive | . | . | 17 | 59 |
| 24 | 38.390 | Died | **.777** | .046 | 18 | 58 |
| 25 | 39.050 | Alive | . | . | 18 | 57 |
| 26 | 40.200 | Alive | . | . | 18 | 56 |
| 27 | 41.680 | Alive | . | . | 18 | 55 |
| 28 | 41.680 | Alive | . | . | 18 | 54 |
| 29 | 42.270 | Alive | . | . | 18 | 53 |
| 30 | 42.500 | Alive | . | . | 18 | 52 |
| 31 | 43.980 | Alive | . | . | 18 | 51 |
| 32 | 44.740 | Alive | . | . | 18 | 50 |
| 33 | 45.790 | Alive | . | . | 18 | 49 |
| 34 | 47.760 | Alive | . | . | 18 | 48 |
| 35 | 47.830 | Alive | . | . | 18 | 47 |
| 36 | 49.240 | Alive | . | . | 18 | 46 |
| 37 | 49.670 | Alive | . | . | 18 | 45 |
| 38 | 49.800 | Alive | . | . | 18 | 44 |
| 39 | 49.840 | Alive | . | . | 18 | 43 |
| 40 | 49.930 | Alive | . | . | 18 | 42 |
| 41 | 50.260 | Alive | . | . | 18 | 41 |
| 42 | 51.410 | Alive | . | . | 18 | 40 |
| 43 | 52.570 | Alive | . | . | 18 | 39 |
| 44 | 54.540 | Alive | . | . | 18 | 38 |
| 45 | 55.100 | Alive | . | . | 18 | 37 |
| 46 | 55.200 | Alive | . | . | 18 | 36 |
| 47 | 56.020 | Alive | . | . | 18 | 35 |
| 48 | 56.280 | Alive | . | . | 18 | 34 |
| 49 | 57.070 | Alive | . | . | 18 | 33 |
| 50 | 57.270 | Alive | . | . | 18 | 32 |
| 51 | 57.700 | Alive | . | . | 18 | 31 |
| 52 | 58.260 | Alive | . | . | 18 | 30 |
| 53 | 60.200 | Alive | . | . | 18 | 29 |
| 54 | 61.220 | Alive | . | . | 18 | 28 |
| 55 | 61.840 | Alive | . | . | 18 | 27 |
| 56 | 62.800 | Alive | . | . | 18 | 26 |
| 57 | 63.060 | Alive | . | . | 18 | 25 |
| 58 | 63.850 | Alive | . | . | 18 | 24 |
| 59 | 66.090 | Alive | . | . | 18 | 23 |
| 60 | 66.280 | Alive | . | . | 18 | 22 |
| 61 | 68.090 | Alive | . | . | 18 | 21 |
| 62 | 68.850 | Alive | . | . | 18 | 20 |
| 63 | 70.590 | Alive | . | . | 18 | 19 |
| 64 | 73.030 | Alive | . | . | 18 | 18 |
| 65 | 73.910 | Alive | . | . | 18 | 17 |
| 66 | 74.080 | Died | .732 | .062 | 19 | 16 |
| 67 | 74.640 | Alive | . | . | 19 | 15 |
| 68 | 75.820 | Alive | . | . | 19 | 14 |
| 69 | 76.150 | Alive | . | . | 19 | 13 |
| 70 | 79.870 | Alive | . | . | 19 | 12 |
| 71 | 81.090 | Alive | . | . | 19 | 11 |
| 72 | 81.780 | Alive | . | . | 19 | 10 |
| 73 | 82.760 | Alive | . | . | 19 | 9 |
| 74 | 85.260 | Alive | . | . | 19 | 8 |
| 75 | 87.630 | Alive | . | . | 19 | 7 |
| 76 | 88.720 | Alive | . | . | 19 | 6 |
| 77 | 89.080 | Alive | . | . | 19 | 5 |
| 78 | 90.820 | Alive | . | . | 19 | 4 |
| 79 | 91.220 | Alive | . | . | 19 | 3 |
| 80 | 98.590 | Alive | . | . | 19 | 2 |
| 81 | 100.660 | Alive | . | . | 19 | 1 |
| 82 | 102.400 | Alive | . | . | 19 | 0 |

| **Overall Comparisons** | | | |
| --- | --- | --- | --- |
|  | Chi-Square | df | P-value |
| Log Rank (Mantel-Cox) | 2.748 | 1 | .097 |
| Molecular. | | | |


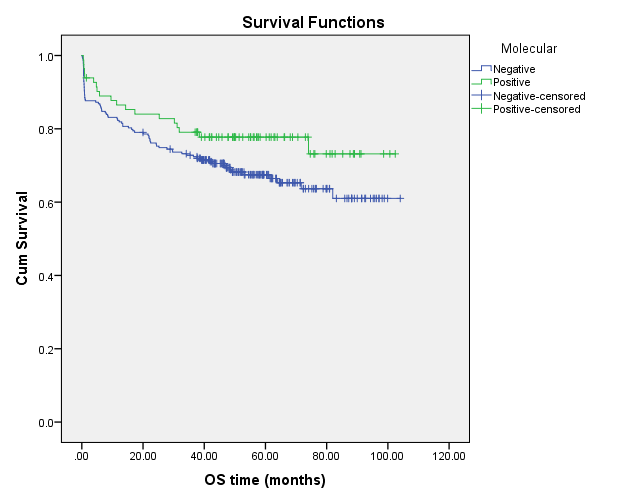


**Kaplan-Meier**

| **Case Processing Summary** | | | | |
| --- | --- | --- | --- | --- |
| 15. CNS status | Total N | N of Events | Censored | |
| N | Percent |
| CNS I | **278** | **75** | 203 | 73.0% |
| CNS II | **4** | **2** | 2 | 50.0% |
| CNS III | **10** | **9** | 1 | 10.0% |
| TLP | 39 | 14 | 25 | 64.1% |
| Overall | 331 | 100 | 231 | 69.8% |

| **Survival Table** | | | | | | | |
| --- | --- | --- | --- | --- | --- | --- | --- |
| 15. CNS status | | Time | Status | Cumulative Proportion Surviving at the Time | | N of Cumulative Events | N of Remaining Cases |
| Estimate | Std. Error |
| CNS I | 1 | .100 | Died | .996 | .004 | 1 | 277 |
| 2 | .330 | Died | .993 | .005 | 2 | 276 |
| 3 | .390 | Died | .989 | .006 | 3 | 275 |
| 4 | .460 | Died | . | . | 4 | 274 |
| 5 | .460 | Died | . | . | 5 | 273 |
| 6 | .460 | Died | .978 | .009 | 6 | 272 |
| 7 | .490 | Died | .975 | .009 | 7 | 271 |
| 8 | .530 | Died | .971 | .010 | 8 | 270 |
| 9 | .560 | Died | . | . | 9 | 269 |
| 10 | .560 | Died | .964 | .011 | 10 | 268 |
| 11 | .590 | Died | .960 | .012 | 11 | 267 |
| 12 | .630 | Died | . | . | 12 | 266 |
| 13 | .630 | Died | . | . | 13 | 265 |
| 14 | .630 | Died | . | . | 14 | 264 |
| 15 | .630 | Died | . | . | 15 | 263 |
| 16 | .630 | Died | .942 | .014 | 16 | 262 |
| 17 | .690 | Died | .939 | .014 | 17 | 261 |
| 18 | .720 | Died | .935 | .015 | 18 | 260 |
| 19 | .760 | Died | .932 | .015 | 19 | 259 |
| 20 | .790 | Died | .928 | .015 | 20 | 258 |
| 21 | .860 | Died | .924 | .016 | 21 | 257 |
| 22 | .890 | Died | . | . | 22 | 256 |
| 23 | .890 | Died | .917 | .017 | 23 | 255 |
| 24 | .920 | Died | .914 | .017 | 24 | 254 |
| 25 | .950 | Died | . | . | 25 | 253 |
| 26 | .950 | Died | .906 | .017 | 26 | 252 |
| 27 | 1.120 | Died | .903 | .018 | 27 | 251 |
| 28 | 1.480 | Alive | . | . | 27 | 250 |
| 29 | 3.850 | Died | .899 | .018 | 28 | 249 |
| 30 | 4.570 | Died | .896 | .018 | 29 | 248 |
| 31 | 4.740 | Died | .892 | .019 | 30 | 247 |
| 32 | 4.970 | Died | .888 | .019 | 31 | 246 |
| 33 | 5.760 | Died | .885 | .019 | 32 | 245 |
| 34 | 6.120 | Died | .881 | .019 | 33 | 244 |
| 35 | 6.250 | Died | .878 | .020 | 34 | 243 |
| 36 | 6.410 | Died | .874 | .020 | 35 | 242 |
| 37 | 7.990 | Died | .870 | .020 | 36 | 241 |
| 38 | 8.420 | Died | .867 | .020 | 37 | 240 |
| 39 | 8.590 | Died | .863 | .021 | 38 | 239 |
| 40 | 11.380 | Died | .860 | .021 | 39 | 238 |
| 41 | 11.510 | Died | .856 | .021 | 40 | 237 |
| 42 | 11.680 | Died | .852 | .021 | 41 | 236 |
| 43 | 12.200 | Died | .849 | .022 | 42 | 235 |
| 44 | 13.390 | Died | . | . | 43 | 234 |
| 45 | 13.390 | Died | .841 | .022 | 44 | 233 |
| 46 | 14.310 | Died | .838 | .022 | 45 | 232 |
| 47 | 16.280 | Died | .834 | .022 | 46 | 231 |
| 48 | 16.680 | Died | .831 | .023 | 47 | 230 |
| 49 | 17.240 | Died | .827 | .023 | 48 | 229 |
| 50 | 19.970 | Alive | . | . | 48 | 228 |
| 51 | 20.000 | Died | .823 | .023 | 49 | 227 |
| 52 | 21.680 | Died | .820 | .023 | 50 | 226 |
| 53 | 21.970 | Died | .816 | .023 | 51 | 225 |
| 54 | 22.300 | Died | .813 | .023 | 52 | 224 |
| 55 | 24.410 | Died | .809 | .024 | 53 | 223 |
| 56 | 25.200 | Died | .805 | .024 | 54 | 222 |
| 57 | 25.300 | Died | .802 | .024 | 55 | 221 |
| 58 | 27.830 | Died | .798 | .024 | 56 | 220 |
| 59 | 28.850 | Alive | . | . | 56 | 219 |
| 60 | 29.570 | Died | .794 | .024 | 57 | 218 |
| 61 | 30.230 | Died | .791 | .024 | 58 | 217 |
| 62 | 31.150 | Died | .787 | .025 | 59 | 216 |
| 63 | 32.700 | Died | .783 | .025 | 60 | 215 |
| 64 | 34.140 | Alive | . | . | 60 | 214 |
| 65 | 34.280 | Died | .780 | .025 | 61 | 213 |
| 66 | 35.390 | Alive | . | . | 61 | 212 |
| 67 | 37.010 | Alive | . | . | 61 | 211 |
| 68 | 37.600 | Alive | . | . | 61 | 210 |
| 69 | 37.600 | Alive | . | . | 61 | 209 |
| 70 | 37.630 | Alive | . | . | 61 | 208 |
| 71 | 37.660 | Died | .776 | .025 | 62 | 207 |
| 72 | 37.660 | Alive | . | . | 62 | 206 |
| 73 | 37.760 | Alive | . | . | 62 | 205 |
| 74 | 37.830 | Alive | . | . | 62 | 204 |
| 75 | 37.860 | Alive | . | . | 62 | 203 |
| 76 | 38.390 | Died | .772 | .025 | 63 | 202 |
| 77 | 38.390 | Alive | . | . | 63 | 201 |
| 78 | 38.750 | Alive | . | . | 63 | 200 |
| 79 | 39.050 | Alive | . | . | 63 | 199 |
| 80 | 39.210 | Died | .768 | .025 | 64 | 198 |
| 81 | 39.210 | Alive | . | . | 64 | 197 |
| 82 | 39.210 | Alive | . | . | 64 | 196 |
| 83 | 39.340 | Alive | . | . | 64 | 195 |
| 84 | 39.510 | Alive | . | . | 64 | 194 |
| 85 | 39.570 | Alive | . | . | 64 | 193 |
| 86 | 39.570 | Alive | . | . | 64 | 192 |
| 87 | 39.700 | Alive | . | . | 64 | 191 |
| 88 | 39.740 | Alive | . | . | 64 | 190 |
| 89 | 39.800 | Alive | . | . | 64 | 189 |
| 90 | 39.970 | Alive | . | . | 64 | 188 |
| 91 | 40.200 | Alive | . | . | 64 | 187 |
| 92 | 40.430 | Alive | . | . | 64 | 186 |
| 93 | 40.490 | Alive | . | . | 64 | 185 |
| 94 | 40.660 | Alive | . | . | 64 | 184 |
| 95 | 41.380 | Alive | . | . | 64 | 183 |
| 96 | 41.680 | Alive | . | . | 64 | 182 |
| 97 | 41.680 | Alive | . | . | 64 | 181 |
| 98 | 41.710 | Alive | . | . | 64 | 180 |
| 99 | 41.740 | Alive | . | . | 64 | 179 |
| 100 | 41.970 | Died | .764 | .026 | 65 | 178 |
| 101 | 41.970 | Alive | . | . | 65 | 177 |
| 102 | 42.430 | Alive | . | . | 65 | 176 |
| 103 | 42.500 | Alive | . | . | 65 | 175 |
| 104 | 42.700 | Died | .760 | .026 | 66 | 174 |
| 105 | 42.760 | Alive | . | . | 66 | 173 |
| 106 | 43.130 | Alive | . | . | 66 | 172 |
| 107 | 43.390 | Alive | . | . | 66 | 171 |
| 108 | 43.420 | Alive | . | . | 66 | 170 |
| 109 | 43.490 | Alive | . | . | 66 | 169 |
| 110 | 43.590 | Alive | . | . | 66 | 168 |
| 111 | 43.650 | Alive | . | . | 66 | 167 |
| 112 | 43.980 | Alive | . | . | 66 | 166 |
| 113 | 44.740 | Alive | . | . | 66 | 165 |
| 114 | 45.230 | Alive | . | . | 66 | 164 |
| 115 | 45.430 | Alive | . | . | 66 | 163 |
| 116 | 45.590 | Alive | . | . | 66 | 162 |
| 117 | 45.790 | Alive | . | . | 66 | 161 |
| 118 | 46.050 | Alive | . | . | 66 | 160 |
| 119 | 46.120 | Alive | . | . | 66 | 159 |
| 120 | 46.180 | Alive | . | . | 66 | 158 |
| 121 | 46.280 | Alive | . | . | 66 | 157 |
| 122 | 46.280 | Alive | . | . | 66 | 156 |
| 123 | 46.740 | Died | .755 | .026 | 67 | 155 |
| 124 | 46.780 | Alive | . | . | 67 | 154 |
| 125 | 46.910 | Died | .750 | .026 | 68 | 153 |
| 126 | 47.170 | Alive | . | . | 68 | 152 |
| 127 | 47.270 | Alive | . | . | 68 | 151 |
| 128 | 47.300 | Alive | . | . | 68 | 150 |
| 129 | 47.300 | Alive | . | . | 68 | 149 |
| 130 | 47.500 | Alive | . | . | 68 | 148 |
| 131 | 47.760 | Alive | . | . | 68 | 147 |
| 132 | 47.830 | Alive | . | . | 68 | 146 |
| 133 | 48.190 | Alive | . | . | 68 | 145 |
| 134 | 48.450 | Alive | . | . | 68 | 144 |
| 135 | 48.550 | Died | .745 | .027 | 69 | 143 |
| 136 | 48.650 | Alive | . | . | 69 | 142 |
| 137 | 49.010 | Died | .739 | .027 | 70 | 141 |
| 138 | 49.180 | Alive | . | . | 70 | 140 |
| 139 | 49.240 | Alive | . | . | 70 | 139 |
| 140 | 49.280 | Alive | . | . | 70 | 138 |
| 141 | 49.310 | Alive | . | . | 70 | 137 |
| 142 | 49.410 | Alive | . | . | 70 | 136 |
| 143 | 49.670 | Alive | . | . | 70 | 135 |
| 144 | 49.800 | Alive | . | . | 70 | 134 |
| 145 | 49.840 | Alive | . | . | 70 | 133 |
| 146 | 49.930 | Alive | . | . | 70 | 132 |
| 147 | 50.000 | Alive | . | . | 70 | 131 |
| 148 | 50.260 | Alive | . | . | 70 | 130 |
| 149 | 50.430 | Alive | . | . | 70 | 129 |
| 150 | 50.630 | Alive | . | . | 70 | 128 |
| 151 | 50.720 | Alive | . | . | 70 | 127 |
| 152 | 51.280 | Alive | . | . | 70 | 126 |
| 153 | 51.320 | Alive | . | . | 70 | 125 |
| 154 | 51.410 | Alive | . | . | 70 | 124 |
| 155 | 51.880 | Alive | . | . | 70 | 123 |
| 156 | 52.040 | Alive | . | . | 70 | 122 |
| 157 | 52.270 | Alive | . | . | 70 | 121 |
| 158 | 52.300 | Alive | . | . | 70 | 120 |
| 159 | 52.430 | Alive | . | . | 70 | 119 |
| 160 | 52.570 | Alive | . | . | 70 | 118 |
| 161 | 52.990 | Alive | . | . | 70 | 117 |
| 162 | 53.060 | Died | .**733** | .028 | 71 | 116 |
| 163 | 53.090 | Alive | . | . | 71 | 115 |
| 164 | 53.320 | Alive | . | . | 71 | 114 |
| 165 | 54.440 | Alive | . | . | 71 | 113 |
| 166 | 54.540 | Alive | . | . | 71 | 112 |
| 167 | 54.930 | Alive | . | . | 71 | 111 |
| 168 | 55.100 | Alive | . | . | 71 | 110 |
| 169 | 55.130 | Alive | . | . | 71 | 109 |
| 170 | 55.200 | Alive | . | . | 71 | 108 |
| 171 | 55.530 | Alive | . | . | 71 | 107 |
| 172 | 55.920 | Alive | . | . | 71 | 106 |
| 173 | 55.920 | Alive | . | . | 71 | 105 |
| 174 | 55.990 | Alive | . | . | 71 | 104 |
| 175 | 56.020 | Alive | . | . | 71 | 103 |
| 176 | 56.280 | Alive | . | . | 71 | 102 |
| 177 | 56.510 | Alive | . | . | 71 | 101 |
| 178 | 57.040 | Alive | . | . | 71 | 100 |
| 179 | 57.070 | Alive | . | . | 71 | 99 |
| 180 | 57.700 | Alive | . | . | 71 | 98 |
| 181 | 57.800 | Alive | . | . | 71 | 97 |
| 182 | 57.930 | Alive | . | . | 71 | 96 |
| 183 | 58.260 | Alive | . | . | 71 | 95 |
| 184 | 58.290 | Alive | . | . | 71 | 94 |
| 185 | 58.590 | Alive | . | . | 71 | 93 |
| 186 | 59.050 | Alive | . | . | 71 | 92 |
| 187 | 59.110 | Alive | . | . | 71 | 91 |
| 188 | 59.140 | Alive | . | . | 71 | 90 |
| 189 | 59.240 | Alive | . | . | 71 | 89 |
| 190 | 59.410 | Alive | . | . | 71 | 88 |
| 191 | 59.510 | Alive | . | . | 71 | 87 |
| 192 | 60.200 | Alive | . | . | 71 | 86 |
| 193 | 60.360 | Alive | . | . | 71 | 85 |
| 194 | 60.790 | Alive | . | . | 71 | 84 |
| 195 | 61.020 | Alive | . | . | 71 | 83 |
| 196 | 61.220 | Alive | . | . | 71 | 82 |
| 197 | 61.250 | Died | .724 | .029 | 72 | 81 |
| 198 | 61.510 | Alive | . | . | 72 | 80 |
| 199 | 61.840 | Alive | . | . | 72 | 79 |
| 200 | 61.840 | Alive | . | . | 72 | 78 |
| 201 | 61.840 | Alive | . | . | 72 | 77 |
| 202 | 62.140 | Alive | . | . | 72 | 76 |
| 203 | 62.400 | Alive | . | . | 72 | 75 |
| 204 | 62.800 | Alive | . | . | 72 | 74 |
| 205 | 62.800 | Alive | . | . | 72 | 73 |
| 206 | 63.060 | Alive | . | . | 72 | 72 |
| 207 | 63.320 | Alive | . | . | 72 | 71 |
| 208 | 63.590 | Alive | . | . | 72 | 70 |
| 209 | 63.850 | Alive | . | . | 72 | 69 |
| 210 | 63.910 | Died | .714 | .030 | 73 | 68 |
| 211 | 64.510 | Alive | . | . | 73 | 67 |
| 212 | 64.640 | Alive | . | . | 73 | 66 |
| 213 | 64.800 | Alive | . | . | 73 | 65 |
| 214 | 65.330 | Alive | . | . | 73 | 64 |
| 215 | 65.560 | Alive | . | . | 73 | 63 |
| 216 | 66.090 | Alive | . | . | 73 | 62 |
| 217 | 67.040 | Alive | . | . | 73 | 61 |
| 218 | 67.340 | Alive | . | . | 73 | 60 |
| 219 | 67.830 | Alive | . | . | 73 | 59 |
| 220 | 68.090 | Alive | . | . | 73 | 58 |
| 221 | 68.850 | Alive | . | . | 73 | 57 |
| 222 | 68.850 | Alive | . | . | 73 | 56 |
| 223 | 69.570 | Alive | . | . | 73 | 55 |
| 224 | 69.700 | Alive | . | . | 73 | 54 |
| 225 | 70.390 | Alive | . | . | 73 | 53 |
| 226 | 71.320 | Alive | . | . | 73 | 52 |
| 227 | 72.340 | Alive | . | . | 73 | 51 |
| 228 | 72.370 | Alive | . | . | 73 | 50 |
| 229 | 73.030 | Alive | . | . | 73 | 49 |
| 230 | 73.060 | Alive | . | . | 73 | 48 |
| 231 | 73.910 | Alive | . | . | 73 | 47 |
| 232 | 74.080 | Died | .699 | .033 | 74 | 46 |
| 233 | 74.110 | Alive | . | . | 74 | 45 |
| 234 | 74.640 | Alive | . | . | 74 | 44 |
| 235 | 75.160 | Alive | . | . | 74 | 43 |
| 236 | 75.720 | Alive | . | . | 74 | 42 |
| 237 | 75.820 | Alive | . | . | 74 | 41 |
| 238 | 75.920 | Alive | . | . | 74 | 40 |
| 239 | 76.150 | Alive | . | . | 74 | 39 |
| 240 | 76.250 | Alive | . | . | 74 | 38 |
| 241 | 76.450 | Alive | . | . | 74 | 37 |
| 242 | 76.640 | Alive | . | . | 74 | 36 |
| 243 | 78.850 | Alive | . | . | 74 | 35 |
| 244 | 79.800 | Alive | . | . | 74 | 34 |
| 245 | 79.840 | Alive | . | . | 74 | 33 |
| 246 | 79.870 | Alive | . | . | 74 | 32 |
| 247 | 80.890 | Alive | . | . | 74 | 31 |
| 248 | 80.950 | Alive | . | . | 74 | 30 |
| 249 | 81.090 | Alive | . | . | 74 | 29 |
| 250 | 81.780 | Alive | . | . | 74 | 28 |
| 251 | 81.970 | Died | .674 | .040 | 75 | 27 |
| 252 | 83.160 | Alive | . | . | 75 | 26 |
| 253 | 85.260 | Alive | . | . | 75 | 25 |
| 254 | 85.890 | Alive | . | . | 75 | 24 |
| 255 | 87.630 | Alive | . | . | 75 | 23 |
| 256 | 88.130 | Alive | . | . | 75 | 22 |
| 257 | 88.190 | Alive | . | . | 75 | 21 |
| 258 | 88.220 | Alive | . | . | 75 | 20 |
| 259 | 88.720 | Alive | . | . | 75 | 19 |
| 260 | 88.720 | Alive | . | . | 75 | 18 |
| 261 | 89.050 | Alive | . | . | 75 | 17 |
| 262 | 89.080 | Alive | . | . | 75 | 16 |
| 263 | 90.000 | Alive | . | . | 75 | 15 |
| 264 | 90.820 | Alive | . | . | 75 | 14 |
| 265 | 91.220 | Alive | . | . | 75 | 13 |
| 266 | 91.380 | Alive | . | . | 75 | 12 |
| 267 | 92.430 | Alive | . | . | 75 | 11 |
| 268 | 92.730 | Alive | . | . | 75 | 10 |
| 269 | 94.340 | Alive | . | . | 75 | 9 |
| 270 | 95.230 | Alive | . | . | 75 | 8 |
| 271 | 95.720 | Alive | . | . | 75 | 7 |
| 272 | 96.250 | Alive | . | . | 75 | 6 |
| 273 | 97.040 | Alive | . | . | 75 | 5 |
| 274 | 98.590 | Alive | . | . | 75 | 4 |
| 275 | 98.820 | Alive | . | . | 75 | 3 |
| 276 | 100.660 | Alive | . | . | 75 | 2 |
| 277 | 102.400 | Alive | . | . | 75 | 1 |
| 278 | 104.050 | Alive | . | . | 75 | 0 |
| CNS II | 1 | .560 | Died | .750 | .217 | 1 | 3 |
| 2 | 1.020 | Died | .**500** | .250 | 2 | 2 |
| 3 | 80.000 | Alive | . | . | 2 | 1 |
| 4 | 86.640 | Alive | . | . | 2 | 0 |
| CNS III | 1 | .560 | Died | .900 | .095 | 1 | 9 |
| 2 | .720 | Died | .800 | .126 | 2 | 8 |
| 3 | .820 | Died | .700 | .145 | 3 | 7 |
| 4 | 7.660 | Died | .600 | .155 | 4 | 6 |
| 5 | 9.540 | Died | .500 | .158 | 5 | 5 |
| 6 | 21.090 | Died | .400 | .155 | 6 | 4 |
| 7 | 21.910 | Died | .300 | .145 | 7 | 3 |
| 8 | 36.450 | Died | .**200** | .126 | 8 | 2 |
| 9 | 66.280 | Alive | . | . | 8 | 1 |
| 10 | 71.710 | Died | .000 | .000 | 9 | 0 |
| TLP | 1 | .490 | Died | .974 | .025 | 1 | 38 |
| 2 | .760 | Died | .949 | .035 | 2 | 37 |
| 3 | .790 | Died | .923 | .043 | 3 | 36 |
| 4 | 5.390 | Died | .897 | .049 | 4 | 35 |
| 5 | 5.890 | Died | .872 | .054 | 5 | 34 |
| 6 | 6.510 | Died | .846 | .058 | 6 | 33 |
| 7 | 13.060 | Died | .821 | .061 | 7 | 32 |
| 8 | 15.230 | Died | .795 | .065 | 8 | 31 |
| 9 | 17.340 | Died | .769 | .067 | 9 | 30 |
| 10 | 22.240 | Died | .744 | .070 | 10 | 29 |
| 11 | 22.470 | Died | .718 | .072 | 11 | 28 |
| 12 | 24.310 | Died | .692 | .074 | 12 | 27 |
| 13 | 29.670 | Died | .667 | .075 | 13 | 26 |
| 14 | 31.840 | Died | .**641** | .077 | 14 | 25 |
| 15 | 39.240 | Alive | . | . | 14 | 24 |
| 16 | 40.590 | Alive | . | . | 14 | 23 |
| 17 | 42.270 | Alive | . | . | 14 | 22 |
| 18 | 44.080 | Alive | . | . | 14 | 21 |
| 19 | 46.580 | Alive | . | . | 14 | 20 |
| 20 | 48.030 | Alive | . | . | 14 | 19 |
| 21 | 51.220 | Alive | . | . | 14 | 18 |
| 22 | 57.270 | Alive | . | . | 14 | 17 |
| 23 | 57.430 | Alive | . | . | 14 | 16 |
| 24 | 58.060 | Alive | . | . | 14 | 15 |
| 25 | 59.240 | Alive | . | . | 14 | 14 |
| 26 | 60.530 | Alive | . | . | 14 | 13 |
| 27 | 62.140 | Alive | . | . | 14 | 12 |
| 28 | 64.900 | Alive | . | . | 14 | 11 |
| 29 | 69.240 | Alive | . | . | 14 | 10 |
| 30 | 70.590 | Alive | . | . | 14 | 9 |
| 31 | 71.380 | Alive | . | . | 14 | 8 |
| 32 | 80.100 | Alive | . | . | 14 | 7 |
| 33 | 82.760 | Alive | . | . | 14 | 6 |
| 34 | 87.200 | Alive | . | . | 14 | 5 |
| 35 | 91.510 | Alive | . | . | 14 | 4 |
| 36 | 97.140 | Alive | . | . | 14 | 3 |
| 37 | 97.170 | Alive | . | . | 14 | 2 |
| 38 | 98.130 | Alive | . | . | 14 | 1 |
| 39 | 99.900 | Alive | . | . | 14 | 0 |

No p-value because of small number of cases within subgroups


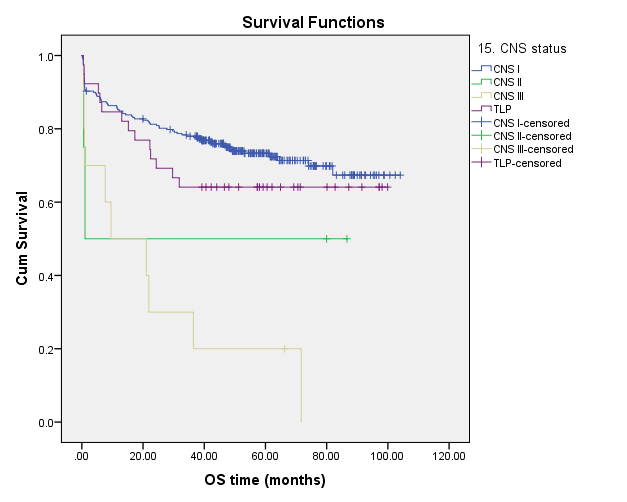


**Kaplan-Meier**

| **Case Processing Summary** | | | | |
| --- | --- | --- | --- | --- |
| CNS.status | Total N | N of Events | Censored | |
| N | Percent |
| CNS I, II, III | **292** | **86** | 206 | 70.5% |
| TLP | **39** | **14** | 25 | 64.1% |
| Overall | 331 | 100 | 231 | 69.8% |

| **Survival Table** | | | | | | | |
| --- | --- | --- | --- | --- | --- | --- | --- |
| CNS.status | | Time | Status | Cumulative Proportion Surviving at the Time | | N of Cumulative Events | N of Remaining Cases |
| Estimate | Std. Error |
| CNS I, II, III | 1 | .100 | Died | .997 | .003 | 1 | 291 |
| 2 | .330 | Died | .993 | .005 | 2 | 290 |
| 3 | .390 | Died | .990 | .006 | 3 | 289 |
| 4 | .460 | Died | . | . | 4 | 288 |
| 5 | .460 | Died | . | . | 5 | 287 |
| 6 | .460 | Died | .979 | .008 | 6 | 286 |
| 7 | .490 | Died | .976 | .009 | 7 | 285 |
| 8 | .530 | Died | .973 | .010 | 8 | 284 |
| 9 | .560 | Died | . | . | 9 | 283 |
| 10 | .560 | Died | . | . | 10 | 282 |
| 11 | .560 | Died | . | . | 11 | 281 |
| 12 | .560 | Died | .959 | .012 | 12 | 280 |
| 13 | .590 | Died | .955 | .012 | 13 | 279 |
| 14 | .630 | Died | . | . | 14 | 278 |
| 15 | .630 | Died | . | . | 15 | 277 |
| 16 | .630 | Died | . | . | 16 | 276 |
| 17 | .630 | Died | . | . | 17 | 275 |
| 18 | .630 | Died | .938 | .014 | 18 | 274 |
| 19 | .690 | Died | .935 | .014 | 19 | 273 |
| 20 | .720 | Died | . | . | 20 | 272 |
| 21 | .720 | Died | .928 | .015 | 21 | 271 |
| 22 | .760 | Died | .925 | .015 | 22 | 270 |
| 23 | .790 | Died | .921 | .016 | 23 | 269 |
| 24 | .820 | Died | .918 | .016 | 24 | 268 |
| 25 | .860 | Died | .914 | .016 | 25 | 267 |
| 26 | .890 | Died | . | . | 26 | 266 |
| 27 | .890 | Died | .908 | .017 | 27 | 265 |
| 28 | .920 | Died | .904 | .017 | 28 | 264 |
| 29 | .950 | Died | . | . | 29 | 263 |
| 30 | .950 | Died | .897 | .018 | 30 | 262 |
| 31 | 1.020 | Died | .894 | .018 | 31 | 261 |
| 32 | 1.120 | Died | .890 | .018 | 32 | 260 |
| 33 | 1.480 | Alive | . | . | 32 | 259 |
| 34 | 3.850 | Died | .887 | .019 | 33 | 258 |
| 35 | 4.570 | Died | .884 | .019 | 34 | 257 |
| 36 | 4.740 | Died | .880 | .019 | 35 | 256 |
| 37 | 4.970 | Died | .877 | .019 | 36 | 255 |
| 38 | 5.760 | Died | .873 | .019 | 37 | 254 |
| 39 | 6.120 | Died | .870 | .020 | 38 | 253 |
| 40 | 6.250 | Died | .866 | .020 | 39 | 252 |
| 41 | 6.410 | Died | .863 | .020 | 40 | 251 |
| 42 | 7.660 | Died | .859 | .020 | 41 | 250 |
| 43 | 7.990 | Died | .856 | .021 | 42 | 249 |
| 44 | 8.420 | Died | .853 | .021 | 43 | 248 |
| 45 | 8.590 | Died | .849 | .021 | 44 | 247 |
| 46 | 9.540 | Died | .846 | .021 | 45 | 246 |
| 47 | 11.380 | Died | .842 | .021 | 46 | 245 |
| 48 | 11.510 | Died | .839 | .022 | 47 | 244 |
| 49 | 11.680 | Died | .835 | .022 | 48 | 243 |
| 50 | 12.200 | Died | .832 | .022 | 49 | 242 |
| 51 | 13.390 | Died | . | . | 50 | 241 |
| 52 | 13.390 | Died | .825 | .022 | 51 | 240 |
| 53 | 14.310 | Died | .822 | .022 | 52 | 239 |
| 54 | 16.280 | Died | .818 | .023 | 53 | 238 |
| 55 | 16.680 | Died | .815 | .023 | 54 | 237 |
| 56 | 17.240 | Died | .811 | .023 | 55 | 236 |
| 57 | 19.970 | Alive | . | . | 55 | 235 |
| 58 | 20.000 | Died | .808 | .023 | 56 | 234 |
| 59 | 21.090 | Died | .804 | .023 | 57 | 233 |
| 60 | 21.680 | Died | .801 | .023 | 58 | 232 |
| 61 | 21.910 | Died | .798 | .024 | 59 | 231 |
| 62 | 21.970 | Died | .794 | .024 | 60 | 230 |
| 63 | 22.300 | Died | .791 | .024 | 61 | 229 |
| 64 | 24.410 | Died | .787 | .024 | 62 | 228 |
| 65 | 25.200 | Died | .784 | .024 | 63 | 227 |
| 66 | 25.300 | Died | .780 | .024 | 64 | 226 |
| 67 | 27.830 | Died | .777 | .024 | 65 | 225 |
| 68 | 28.850 | Alive | . | . | 65 | 224 |
| 69 | 29.570 | Died | .773 | .025 | 66 | 223 |
| 70 | 30.230 | Died | .770 | .025 | 67 | 222 |
| 71 | 31.150 | Died | .766 | .025 | 68 | 221 |
| 72 | 32.700 | Died | .763 | .025 | 69 | 220 |
| 73 | 34.140 | Alive | . | . | 69 | 219 |
| 74 | 34.280 | Died | .759 | .025 | 70 | 218 |
| 75 | 35.390 | Alive | . | . | 70 | 217 |
| 76 | 36.450 | Died | .756 | .025 | 71 | 216 |
| 77 | 37.010 | Alive | . | . | 71 | 215 |
| 78 | 37.600 | Alive | . | . | 71 | 214 |
| 79 | 37.600 | Alive | . | . | 71 | 213 |
| 80 | 37.630 | Alive | . | . | 71 | 212 |
| 81 | 37.660 | Died | .752 | .025 | 72 | 211 |
| 82 | 37.660 | Alive | . | . | 72 | 210 |
| 83 | 37.760 | Alive | . | . | 72 | 209 |
| 84 | 37.830 | Alive | . | . | 72 | 208 |
| 85 | 37.860 | Alive | . | . | 72 | 207 |
| 86 | 38.390 | Died | .749 | .025 | 73 | 206 |
| 87 | 38.390 | Alive | . | . | 73 | 205 |
| 88 | 38.750 | Alive | . | . | 73 | 204 |
| 89 | 39.050 | Alive | . | . | 73 | 203 |
| 90 | 39.210 | Died | .745 | .026 | 74 | 202 |
| 91 | 39.210 | Alive | . | . | 74 | 201 |
| 92 | 39.210 | Alive | . | . | 74 | 200 |
| 93 | 39.340 | Alive | . | . | 74 | 199 |
| 94 | 39.510 | Alive | . | . | 74 | 198 |
| 95 | 39.570 | Alive | . | . | 74 | 197 |
| 96 | 39.570 | Alive | . | . | 74 | 196 |
| 97 | 39.700 | Alive | . | . | 74 | 195 |
| 98 | 39.740 | Alive | . | . | 74 | 194 |
| 99 | 39.800 | Alive | . | . | 74 | 193 |
| 100 | 39.970 | Alive | . | . | 74 | 192 |
| 101 | 40.200 | Alive | . | . | 74 | 191 |
| 102 | 40.430 | Alive | . | . | 74 | 190 |
| 103 | 40.490 | Alive | . | . | 74 | 189 |
| 104 | 40.660 | Alive | . | . | 74 | 188 |
| 105 | 41.380 | Alive | . | . | 74 | 187 |
| 106 | 41.680 | Alive | . | . | 74 | 186 |
| 107 | 41.680 | Alive | . | . | 74 | 185 |
| 108 | 41.710 | Alive | . | . | 74 | 184 |
| 109 | 41.740 | Alive | . | . | 74 | 183 |
| 110 | 41.970 | Died | .741 | .026 | 75 | 182 |
| 111 | 41.970 | Alive | . | . | 75 | 181 |
| 112 | 42.430 | Alive | . | . | 75 | 180 |
| 113 | 42.500 | Alive | . | . | 75 | 179 |
| 114 | 42.700 | Died | .737 | .026 | 76 | 178 |
| 115 | 42.760 | Alive | . | . | 76 | 177 |
| 116 | 43.130 | Alive | . | . | 76 | 176 |
| 117 | 43.390 | Alive | . | . | 76 | 175 |
| 118 | 43.420 | Alive | . | . | 76 | 174 |
| 119 | 43.490 | Alive | . | . | 76 | 173 |
| 120 | 43.590 | Alive | . | . | 76 | 172 |
| 121 | 43.650 | Alive | . | . | 76 | 171 |
| 122 | 43.980 | Alive | . | . | 76 | 170 |
| 123 | 44.740 | Alive | . | . | 76 | 169 |
| 124 | 45.230 | Alive | . | . | 76 | 168 |
| 125 | 45.430 | Alive | . | . | 76 | 167 |
| 126 | 45.590 | Alive | . | . | 76 | 166 |
| 127 | 45.790 | Alive | . | . | 76 | 165 |
| 128 | 46.050 | Alive | . | . | 76 | 164 |
| 129 | 46.120 | Alive | . | . | 76 | 163 |
| 130 | 46.180 | Alive | . | . | 76 | 162 |
| 131 | 46.280 | Alive | . | . | 76 | 161 |
| 132 | 46.280 | Alive | . | . | 76 | 160 |
| 133 | 46.740 | Died | .732 | .026 | 77 | 159 |
| 134 | 46.780 | Alive | . | . | 77 | 158 |
| 135 | 46.910 | Died | .728 | .026 | 78 | 157 |
| 136 | 47.170 | Alive | . | . | 78 | 156 |
| 137 | 47.270 | Alive | . | . | 78 | 155 |
| 138 | 47.300 | Alive | . | . | 78 | 154 |
| 139 | 47.300 | Alive | . | . | 78 | 153 |
| 140 | 47.500 | Alive | . | . | 78 | 152 |
| 141 | 47.760 | Alive | . | . | 78 | 151 |
| 142 | 47.830 | Alive | . | . | 78 | 150 |
| 143 | 48.190 | Alive | . | . | 78 | 149 |
| 144 | 48.450 | Alive | . | . | 78 | 148 |
| 145 | 48.550 | Died | .723 | .027 | 79 | 147 |
| 146 | 48.650 | Alive | . | . | 79 | 146 |
| 147 | 49.010 | Died | .718 | .027 | 80 | 145 |
| 148 | 49.180 | Alive | . | . | 80 | 144 |
| 149 | 49.240 | Alive | . | . | 80 | 143 |
| 150 | 49.280 | Alive | . | . | 80 | 142 |
| 151 | 49.310 | Alive | . | . | 80 | 141 |
| 152 | 49.410 | Alive | . | . | 80 | 140 |
| 153 | 49.670 | Alive | . | . | 80 | 139 |
| 154 | 49.800 | Alive | . | . | 80 | 138 |
| 155 | 49.840 | Alive | . | . | 80 | 137 |
| 156 | 49.930 | Alive | . | . | 80 | 136 |
| 157 | 50.000 | Alive | . | . | 80 | 135 |
| 158 | 50.260 | Alive | . | . | 80 | 134 |
| 159 | 50.430 | Alive | . | . | 80 | 133 |
| 160 | 50.630 | Alive | . | . | 80 | 132 |
| 161 | 50.720 | Alive | . | . | 80 | 131 |
| 162 | 51.280 | Alive | . | . | 80 | 130 |
| 163 | 51.320 | Alive | . | . | 80 | 129 |
| 164 | 51.410 | Alive | . | . | 80 | 128 |
| 165 | 51.880 | Alive | . | . | 80 | 127 |
| 166 | 52.040 | Alive | . | . | 80 | 126 |
| 167 | 52.270 | Alive | . | . | 80 | 125 |
| 168 | 52.300 | Alive | . | . | 80 | 124 |
| 169 | 52.430 | Alive | . | . | 80 | 123 |
| 170 | 52.570 | Alive | . | . | 80 | 122 |
| 171 | 52.990 | Alive | . | . | 80 | 121 |
| 172 | 53.060 | Died | **.712** | .027 | 81 | 120 |
| 173 | 53.090 | Alive | . | . | 81 | 119 |
| 174 | 53.320 | Alive | . | . | 81 | 118 |
| 175 | 54.440 | Alive | . | . | 81 | 117 |
| 176 | 54.540 | Alive | . | . | 81 | 116 |
| 177 | 54.930 | Alive | . | . | 81 | 115 |
| 178 | 55.100 | Alive | . | . | 81 | 114 |
| 179 | 55.130 | Alive | . | . | 81 | 113 |
| 180 | 55.200 | Alive | . | . | 81 | 112 |
| 181 | 55.530 | Alive | . | . | 81 | 111 |
| 182 | 55.920 | Alive | . | . | 81 | 110 |
| 183 | 55.920 | Alive | . | . | 81 | 109 |
| 184 | 55.990 | Alive | . | . | 81 | 108 |
| 185 | 56.020 | Alive | . | . | 81 | 107 |
| 186 | 56.280 | Alive | . | . | 81 | 106 |
| 187 | 56.510 | Alive | . | . | 81 | 105 |
| 188 | 57.040 | Alive | . | . | 81 | 104 |
| 189 | 57.070 | Alive | . | . | 81 | 103 |
| 190 | 57.700 | Alive | . | . | 81 | 102 |
| 191 | 57.800 | Alive | . | . | 81 | 101 |
| 192 | 57.930 | Alive | . | . | 81 | 100 |
| 193 | 58.260 | Alive | . | . | 81 | 99 |
| 194 | 58.290 | Alive | . | . | 81 | 98 |
| 195 | 58.590 | Alive | . | . | 81 | 97 |
| 196 | 59.050 | Alive | . | . | 81 | 96 |
| 197 | 59.110 | Alive | . | . | 81 | 95 |
| 198 | 59.140 | Alive | . | . | 81 | 94 |
| 199 | 59.240 | Alive | . | . | 81 | 93 |
| 200 | 59.410 | Alive | . | . | 81 | 92 |
| 201 | 59.510 | Alive | . | . | 81 | 91 |
| 202 | 60.200 | Alive | . | . | 81 | 90 |
| 203 | 60.360 | Alive | . | . | 81 | 89 |
| 204 | 60.790 | Alive | . | . | 81 | 88 |
| 205 | 61.020 | Alive | . | . | 81 | 87 |
| 206 | 61.220 | Alive | . | . | 81 | 86 |
| 207 | 61.250 | Died | .704 | .028 | 82 | 85 |
| 208 | 61.510 | Alive | . | . | 82 | 84 |
| 209 | 61.840 | Alive | . | . | 82 | 83 |
| 210 | 61.840 | Alive | . | . | 82 | 82 |
| 211 | 61.840 | Alive | . | . | 82 | 81 |
| 212 | 62.140 | Alive | . | . | 82 | 80 |
| 213 | 62.400 | Alive | . | . | 82 | 79 |
| 214 | 62.800 | Alive | . | . | 82 | 78 |
| 215 | 62.800 | Alive | . | . | 82 | 77 |
| 216 | 63.060 | Alive | . | . | 82 | 76 |
| 217 | 63.320 | Alive | . | . | 82 | 75 |
| 218 | 63.590 | Alive | . | . | 82 | 74 |
| 219 | 63.850 | Alive | . | . | 82 | 73 |
| 220 | 63.910 | Died | .694 | .030 | 83 | 72 |
| 221 | 64.510 | Alive | . | . | 83 | 71 |
| 222 | 64.640 | Alive | . | . | 83 | 70 |
| 223 | 64.800 | Alive | . | . | 83 | 69 |
| 224 | 65.330 | Alive | . | . | 83 | 68 |
| 225 | 65.560 | Alive | . | . | 83 | 67 |
| 226 | 66.090 | Alive | . | . | 83 | 66 |
| 227 | 66.280 | Alive | . | . | 83 | 65 |
| 228 | 67.040 | Alive | . | . | 83 | 64 |
| 229 | 67.340 | Alive | . | . | 83 | 63 |
| 230 | 67.830 | Alive | . | . | 83 | 62 |
| 231 | 68.090 | Alive | . | . | 83 | 61 |
| 232 | 68.850 | Alive | . | . | 83 | 60 |
| 233 | 68.850 | Alive | . | . | 83 | 59 |
| 234 | 69.570 | Alive | . | . | 83 | 58 |
| 235 | 69.700 | Alive | . | . | 83 | 57 |
| 236 | 70.390 | Alive | . | . | 83 | 56 |
| 237 | 71.320 | Alive | . | . | 83 | 55 |
| 238 | 71.710 | Died | .681 | .032 | 84 | 54 |
| 239 | 72.340 | Alive | . | . | 84 | 53 |
| 240 | 72.370 | Alive | . | . | 84 | 52 |
| 241 | 73.030 | Alive | . | . | 84 | 51 |
| 242 | 73.060 | Alive | . | . | 84 | 50 |
| 243 | 73.910 | Alive | . | . | 84 | 49 |
| 244 | 74.080 | Died | .667 | .034 | 85 | 48 |
| 245 | 74.110 | Alive | . | . | 85 | 47 |
| 246 | 74.640 | Alive | . | . | 85 | 46 |
| 247 | 75.160 | Alive | . | . | 85 | 45 |
| 248 | 75.720 | Alive | . | . | 85 | 44 |
| 249 | 75.820 | Alive | . | . | 85 | 43 |
| 250 | 75.920 | Alive | . | . | 85 | 42 |
| 251 | 76.150 | Alive | . | . | 85 | 41 |
| 252 | 76.250 | Alive | . | . | 85 | 40 |
| 253 | 76.450 | Alive | . | . | 85 | 39 |
| 254 | 76.640 | Alive | . | . | 85 | 38 |
| 255 | 78.850 | Alive | . | . | 85 | 37 |
| 256 | 79.800 | Alive | . | . | 85 | 36 |
| 257 | 79.840 | Alive | . | . | 85 | 35 |
| 258 | 79.870 | Alive | . | . | 85 | 34 |
| 259 | 80.000 | Alive | . | . | 85 | 33 |
| 260 | 80.890 | Alive | . | . | 85 | 32 |
| 261 | 80.950 | Alive | . | . | 85 | 31 |
| 262 | 81.090 | Alive | . | . | 85 | 30 |
| 263 | 81.780 | Alive | . | . | 85 | 29 |
| 264 | 81.970 | Died | .644 | .040 | 86 | 28 |
| 265 | 83.160 | Alive | . | . | 86 | 27 |
| 266 | 85.260 | Alive | . | . | 86 | 26 |
| 267 | 85.890 | Alive | . | . | 86 | 25 |
| 268 | 86.640 | Alive | . | . | 86 | 24 |
| 269 | 87.630 | Alive | . | . | 86 | 23 |
| 270 | 88.130 | Alive | . | . | 86 | 22 |
| 271 | 88.190 | Alive | . | . | 86 | 21 |
| 272 | 88.220 | Alive | . | . | 86 | 20 |
| 273 | 88.720 | Alive | . | . | 86 | 19 |
| 274 | 88.720 | Alive | . | . | 86 | 18 |
| 275 | 89.050 | Alive | . | . | 86 | 17 |
| 276 | 89.080 | Alive | . | . | 86 | 16 |
| 277 | 90.000 | Alive | . | . | 86 | 15 |
| 278 | 90.820 | Alive | . | . | 86 | 14 |
| 279 | 91.220 | Alive | . | . | 86 | 13 |
| 280 | 91.380 | Alive | . | . | 86 | 12 |
| 281 | 92.430 | Alive | . | . | 86 | 11 |
| 282 | 92.730 | Alive | . | . | 86 | 10 |
| 283 | 94.340 | Alive | . | . | 86 | 9 |
| 284 | 95.230 | Alive | . | . | 86 | 8 |
| 285 | 95.720 | Alive | . | . | 86 | 7 |
| 286 | 96.250 | Alive | . | . | 86 | 6 |
| 287 | 97.040 | Alive | . | . | 86 | 5 |
| 288 | 98.590 | Alive | . | . | 86 | 4 |
| 289 | 98.820 | Alive | . | . | 86 | 3 |
| 290 | 100.660 | Alive | . | . | 86 | 2 |
| 291 | 102.400 | Alive | . | . | 86 | 1 |
| 292 | 104.050 | Alive | . | . | 86 | 0 |
| TLP | 1 | .490 | Died | .974 | .025 | 1 | 38 |
| 2 | .760 | Died | .949 | .035 | 2 | 37 |
| 3 | .790 | Died | .923 | .043 | 3 | 36 |
| 4 | 5.390 | Died | .897 | .049 | 4 | 35 |
| 5 | 5.890 | Died | .872 | .054 | 5 | 34 |
| 6 | 6.510 | Died | .846 | .058 | 6 | 33 |
| 7 | 13.060 | Died | .821 | .061 | 7 | 32 |
| 8 | 15.230 | Died | .795 | .065 | 8 | 31 |
| 9 | 17.340 | Died | .769 | .067 | 9 | 30 |
| 10 | 22.240 | Died | .744 | .070 | 10 | 29 |
| 11 | 22.470 | Died | .718 | .072 | 11 | 28 |
| 12 | 24.310 | Died | .692 | .074 | 12 | 27 |
| 13 | 29.670 | Died | .667 | .075 | 13 | 26 |
| 14 | 31.840 | Died | **.641** | .077 | 14 | 25 |
| 15 | 39.240 | Alive | . | . | 14 | 24 |
| 16 | 40.590 | Alive | . | . | 14 | 23 |
| 17 | 42.270 | Alive | . | . | 14 | 22 |
| 18 | 44.080 | Alive | . | . | 14 | 21 |
| 19 | 46.580 | Alive | . | . | 14 | 20 |
| 20 | 48.030 | Alive | . | . | 14 | 19 |
| 21 | 51.220 | Alive | . | . | 14 | 18 |
| 22 | 57.270 | Alive | . | . | 14 | 17 |
| 23 | 57.430 | Alive | . | . | 14 | 16 |
| 24 | 58.060 | Alive | . | . | 14 | 15 |
| 25 | 59.240 | Alive | . | . | 14 | 14 |
| 26 | 60.530 | Alive | . | . | 14 | 13 |
| 27 | 62.140 | Alive | . | . | 14 | 12 |
| 28 | 64.900 | Alive | . | . | 14 | 11 |
| 29 | 69.240 | Alive | . | . | 14 | 10 |
| 30 | 70.590 | Alive | . | . | 14 | 9 |
| 31 | 71.380 | Alive | . | . | 14 | 8 |
| 32 | 80.100 | Alive | . | . | 14 | 7 |
| 33 | 82.760 | Alive | . | . | 14 | 6 |
| 34 | 87.200 | Alive | . | . | 14 | 5 |
| 35 | 91.510 | Alive | . | . | 14 | 4 |
| 36 | 97.140 | Alive | . | . | 14 | 3 |
| 37 | 97.170 | Alive | . | . | 14 | 2 |
| 38 | 98.130 | Alive | . | . | 14 | 1 |
| 39 | 99.900 | Alive | . | . | 14 | 0 |

| **Overall Comparisons** | | | |
| --- | --- | --- | --- |
|  | Chi-Square | df | P-value |
| Log Rank (Mantel-Cox) | .479 | 1 | **.489** |
| CNS.status. | | | |


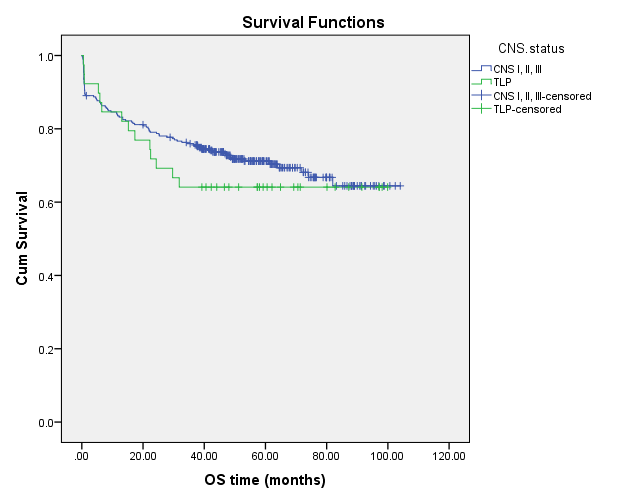


**Kaplan-Meier**

| **Case Processing Summary** | | | | |
| --- | --- | --- | --- | --- |
| CNS.status1 | Total N | N of Events | Censored | |
| N | Percent |
| CNS I, III | **288** | **84** | 204 | 70.8% |
| CNS II, TLP | **43** | **16** | 27 | 62.8% |
| Overall | 331 | 100 | 231 | 69.8% |

| **Survival Table** | | | | | | | |
| --- | --- | --- | --- | --- | --- | --- | --- |
| CNS.status1 | | Time | Status | Cumulative Proportion Surviving at the Time | | N of Cumulative Events | N of Remaining Cases |
| Estimate | Std. Error |
| CNS I, III | 1 | .100 | Died | .997 | .003 | 1 | 287 |
| 2 | .330 | Died | .993 | .005 | 2 | 286 |
| 3 | .390 | Died | .990 | .006 | 3 | 285 |
| 4 | .460 | Died | . | . | 4 | 284 |
| 5 | .460 | Died | . | . | 5 | 283 |
| 6 | .460 | Died | .979 | .008 | 6 | 282 |
| 7 | .490 | Died | .976 | .009 | 7 | 281 |
| 8 | .530 | Died | .972 | .010 | 8 | 280 |
| 9 | .560 | Died | . | . | 9 | 279 |
| 10 | .560 | Died | . | . | 10 | 278 |
| 11 | .560 | Died | .962 | .011 | 11 | 277 |
| 12 | .590 | Died | .958 | .012 | 12 | 276 |
| 13 | .630 | Died | . | . | 13 | 275 |
| 14 | .630 | Died | . | . | 14 | 274 |
| 15 | .630 | Died | . | . | 15 | 273 |
| 16 | .630 | Died | . | . | 16 | 272 |
| 17 | .630 | Died | .941 | .014 | 17 | 271 |
| 18 | .690 | Died | .937 | .014 | 18 | 270 |
| 19 | .720 | Died | . | . | 19 | 269 |
| 20 | .720 | Died | .931 | .015 | 20 | 268 |
| 21 | .760 | Died | .927 | .015 | 21 | 267 |
| 22 | .790 | Died | .924 | .016 | 22 | 266 |
| 23 | .820 | Died | .920 | .016 | 23 | 265 |
| 24 | .860 | Died | .917 | .016 | 24 | 264 |
| 25 | .890 | Died | . | . | 25 | 263 |
| 26 | .890 | Died | .910 | .017 | 26 | 262 |
| 27 | .920 | Died | .906 | .017 | 27 | 261 |
| 28 | .950 | Died | . | . | 28 | 260 |
| 29 | .950 | Died | .899 | .018 | 29 | 259 |
| 30 | 1.120 | Died | .896 | .018 | 30 | 258 |
| 31 | 1.480 | Alive | . | . | 30 | 257 |
| 32 | 3.850 | Died | .892 | .018 | 31 | 256 |
| 33 | 4.570 | Died | .889 | .019 | 32 | 255 |
| 34 | 4.740 | Died | .885 | .019 | 33 | 254 |
| 35 | 4.970 | Died | .882 | .019 | 34 | 253 |
| 36 | 5.760 | Died | .878 | .019 | 35 | 252 |
| 37 | 6.120 | Died | .875 | .020 | 36 | 251 |
| 38 | 6.250 | Died | .871 | .020 | 37 | 250 |
| 39 | 6.410 | Died | .868 | .020 | 38 | 249 |
| 40 | 7.660 | Died | .864 | .020 | 39 | 248 |
| 41 | 7.990 | Died | .861 | .020 | 40 | 247 |
| 42 | 8.420 | Died | .857 | .021 | 41 | 246 |
| 43 | 8.590 | Died | .854 | .021 | 42 | 245 |
| 44 | 9.540 | Died | .851 | .021 | 43 | 244 |
| 45 | 11.380 | Died | .847 | .021 | 44 | 243 |
| 46 | 11.510 | Died | .844 | .021 | 45 | 242 |
| 47 | 11.680 | Died | .840 | .022 | 46 | 241 |
| 48 | 12.200 | Died | .837 | .022 | 47 | 240 |
| 49 | 13.390 | Died | . | . | 48 | 239 |
| 50 | 13.390 | Died | .830 | .022 | 49 | 238 |
| 51 | 14.310 | Died | .826 | .022 | 50 | 237 |
| 52 | 16.280 | Died | .823 | .023 | 51 | 236 |
| 53 | 16.680 | Died | .819 | .023 | 52 | 235 |
| 54 | 17.240 | Died | .816 | .023 | 53 | 234 |
| 55 | 19.970 | Alive | . | . | 53 | 233 |
| 56 | 20.000 | Died | .812 | .023 | 54 | 232 |
| 57 | 21.090 | Died | .809 | .023 | 55 | 231 |
| 58 | 21.680 | Died | .805 | .023 | 56 | 230 |
| 59 | 21.910 | Died | .802 | .024 | 57 | 229 |
| 60 | 21.970 | Died | .798 | .024 | 58 | 228 |
| 61 | 22.300 | Died | .795 | .024 | 59 | 227 |
| 62 | 24.410 | Died | .791 | .024 | 60 | 226 |
| 63 | 25.200 | Died | .788 | .024 | 61 | 225 |
| 64 | 25.300 | Died | .784 | .024 | 62 | 224 |
| 65 | 27.830 | Died | .781 | .024 | 63 | 223 |
| 66 | 28.850 | Alive | . | . | 63 | 222 |
| 67 | 29.570 | Died | .777 | .025 | 64 | 221 |
| 68 | 30.230 | Died | .774 | .025 | 65 | 220 |
| 69 | 31.150 | Died | .770 | .025 | 66 | 219 |
| 70 | 32.700 | Died | .767 | .025 | 67 | 218 |
| 71 | 34.140 | Alive | . | . | 67 | 217 |
| 72 | 34.280 | Died | .763 | .025 | 68 | 216 |
| 73 | 35.390 | Alive | . | . | 68 | 215 |
| 74 | 36.450 | Died | .760 | .025 | 69 | 214 |
| 75 | 37.010 | Alive | . | . | 69 | 213 |
| 76 | 37.600 | Alive | . | . | 69 | 212 |
| 77 | 37.600 | Alive | . | . | 69 | 211 |
| 78 | 37.630 | Alive | . | . | 69 | 210 |
| 79 | 37.660 | Died | .756 | .025 | 70 | 209 |
| 80 | 37.660 | Alive | . | . | 70 | 208 |
| 81 | 37.760 | Alive | . | . | 70 | 207 |
| 82 | 37.830 | Alive | . | . | 70 | 206 |
| 83 | 37.860 | Alive | . | . | 70 | 205 |
| 84 | 38.390 | Died | .752 | .026 | 71 | 204 |
| 85 | 38.390 | Alive | . | . | 71 | 203 |
| 86 | 38.750 | Alive | . | . | 71 | 202 |
| 87 | 39.050 | Alive | . | . | 71 | 201 |
| 88 | 39.210 | Died | .748 | .026 | 72 | 200 |
| 89 | 39.210 | Alive | . | . | 72 | 199 |
| 90 | 39.210 | Alive | . | . | 72 | 198 |
| 91 | 39.340 | Alive | . | . | 72 | 197 |
| 92 | 39.510 | Alive | . | . | 72 | 196 |
| 93 | 39.570 | Alive | . | . | 72 | 195 |
| 94 | 39.570 | Alive | . | . | 72 | 194 |
| 95 | 39.700 | Alive | . | . | 72 | 193 |
| 96 | 39.740 | Alive | . | . | 72 | 192 |
| 97 | 39.800 | Alive | . | . | 72 | 191 |
| 98 | 39.970 | Alive | . | . | 72 | 190 |
| 99 | 40.200 | Alive | . | . | 72 | 189 |
| 100 | 40.430 | Alive | . | . | 72 | 188 |
| 101 | 40.490 | Alive | . | . | 72 | 187 |
| 102 | 40.660 | Alive | . | . | 72 | 186 |
| 103 | 41.380 | Alive | . | . | 72 | 185 |
| 104 | 41.680 | Alive | . | . | 72 | 184 |
| 105 | 41.680 | Alive | . | . | 72 | 183 |
| 106 | 41.710 | Alive | . | . | 72 | 182 |
| 107 | 41.740 | Alive | . | . | 72 | 181 |
| 108 | 41.970 | Died | .744 | .026 | 73 | 180 |
| 109 | 41.970 | Alive | . | . | 73 | 179 |
| 110 | 42.430 | Alive | . | . | 73 | 178 |
| 111 | 42.500 | Alive | . | . | 73 | 177 |
| 112 | 42.700 | Died | .740 | .026 | 74 | 176 |
| 113 | 42.760 | Alive | . | . | 74 | 175 |
| 114 | 43.130 | Alive | . | . | 74 | 174 |
| 115 | 43.390 | Alive | . | . | 74 | 173 |
| 116 | 43.420 | Alive | . | . | 74 | 172 |
| 117 | 43.490 | Alive | . | . | 74 | 171 |
| 118 | 43.590 | Alive | . | . | 74 | 170 |
| 119 | 43.650 | Alive | . | . | 74 | 169 |
| 120 | 43.980 | Alive | . | . | 74 | 168 |
| 121 | 44.740 | Alive | . | . | 74 | 167 |
| 122 | 45.230 | Alive | . | . | 74 | 166 |
| 123 | 45.430 | Alive | . | . | 74 | 165 |
| 124 | 45.590 | Alive | . | . | 74 | 164 |
| 125 | 45.790 | Alive | . | . | 74 | 163 |
| 126 | 46.050 | Alive | . | . | 74 | 162 |
| 127 | 46.120 | Alive | . | . | 74 | 161 |
| 128 | 46.180 | Alive | . | . | 74 | 160 |
| 129 | 46.280 | Alive | . | . | 74 | 159 |
| 130 | 46.280 | Alive | . | . | 74 | 158 |
| 131 | 46.740 | Died | .735 | .026 | 75 | 157 |
| 132 | 46.780 | Alive | . | . | 75 | 156 |
| 133 | 46.910 | Died | .731 | .027 | 76 | 155 |
| 134 | 47.170 | Alive | . | . | 76 | 154 |
| 135 | 47.270 | Alive | . | . | 76 | 153 |
| 136 | 47.300 | Alive | . | . | 76 | 152 |
| 137 | 47.300 | Alive | . | . | 76 | 151 |
| 138 | 47.500 | Alive | . | . | 76 | 150 |
| 139 | 47.760 | Alive | . | . | 76 | 149 |
| 140 | 47.830 | Alive | . | . | 76 | 148 |
| 141 | 48.190 | Alive | . | . | 76 | 147 |
| 142 | 48.450 | Alive | . | . | 76 | 146 |
| 143 | 48.550 | Died | .726 | .027 | 77 | 145 |
| 144 | 48.650 | Alive | . | . | 77 | 144 |
| 145 | 49.010 | Died | .721 | .027 | 78 | 143 |
| 146 | 49.180 | Alive | . | . | 78 | 142 |
| 147 | 49.240 | Alive | . | . | 78 | 141 |
| 148 | 49.280 | Alive | . | . | 78 | 140 |
| 149 | 49.310 | Alive | . | . | 78 | 139 |
| 150 | 49.410 | Alive | . | . | 78 | 138 |
| 151 | 49.670 | Alive | . | . | 78 | 137 |
| 152 | 49.800 | Alive | . | . | 78 | 136 |
| 153 | 49.840 | Alive | . | . | 78 | 135 |
| 154 | 49.930 | Alive | . | . | 78 | 134 |
| 155 | 50.000 | Alive | . | . | 78 | 133 |
| 156 | 50.260 | Alive | . | . | 78 | 132 |
| 157 | 50.430 | Alive | . | . | 78 | 131 |
| 158 | 50.630 | Alive | . | . | 78 | 130 |
| 159 | 50.720 | Alive | . | . | 78 | 129 |
| 160 | 51.280 | Alive | . | . | 78 | 128 |
| 161 | 51.320 | Alive | . | . | 78 | 127 |
| 162 | 51.410 | Alive | . | . | 78 | 126 |
| 163 | 51.880 | Alive | . | . | 78 | 125 |
| 164 | 52.040 | Alive | . | . | 78 | 124 |
| 165 | 52.270 | Alive | . | . | 78 | 123 |
| 166 | 52.300 | Alive | . | . | 78 | 122 |
| 167 | 52.430 | Alive | . | . | 78 | 121 |
| 168 | 52.570 | Alive | . | . | 78 | 120 |
| 169 | 52.990 | Alive | . | . | 78 | 119 |
| 170 | 53.060 | Died | .**715** | .028 | 79 | 118 |
| 171 | 53.090 | Alive | . | . | 79 | 117 |
| 172 | 53.320 | Alive | . | . | 79 | 116 |
| 173 | 54.440 | Alive | . | . | 79 | 115 |
| 174 | 54.540 | Alive | . | . | 79 | 114 |
| 175 | 54.930 | Alive | . | . | 79 | 113 |
| 176 | 55.100 | Alive | . | . | 79 | 112 |
| 177 | 55.130 | Alive | . | . | 79 | 111 |
| 178 | 55.200 | Alive | . | . | 79 | 110 |
| 179 | 55.530 | Alive | . | . | 79 | 109 |
| 180 | 55.920 | Alive | . | . | 79 | 108 |
| 181 | 55.920 | Alive | . | . | 79 | 107 |
| 182 | 55.990 | Alive | . | . | 79 | 106 |
| 183 | 56.020 | Alive | . | . | 79 | 105 |
| 184 | 56.280 | Alive | . | . | 79 | 104 |
| 185 | 56.510 | Alive | . | . | 79 | 103 |
| 186 | 57.040 | Alive | . | . | 79 | 102 |
| 187 | 57.070 | Alive | . | . | 79 | 101 |
| 188 | 57.700 | Alive | . | . | 79 | 100 |
| 189 | 57.800 | Alive | . | . | 79 | 99 |
| 190 | 57.930 | Alive | . | . | 79 | 98 |
| 191 | 58.260 | Alive | . | . | 79 | 97 |
| 192 | 58.290 | Alive | . | . | 79 | 96 |
| 193 | 58.590 | Alive | . | . | 79 | 95 |
| 194 | 59.050 | Alive | . | . | 79 | 94 |
| 195 | 59.110 | Alive | . | . | 79 | 93 |
| 196 | 59.140 | Alive | . | . | 79 | 92 |
| 197 | 59.240 | Alive | . | . | 79 | 91 |
| 198 | 59.410 | Alive | . | . | 79 | 90 |
| 199 | 59.510 | Alive | . | . | 79 | 89 |
| 200 | 60.200 | Alive | . | . | 79 | 88 |
| 201 | 60.360 | Alive | . | . | 79 | 87 |
| 202 | 60.790 | Alive | . | . | 79 | 86 |
| 203 | 61.020 | Alive | . | . | 79 | 85 |
| 204 | 61.220 | Alive | . | . | 79 | 84 |
| 205 | 61.250 | Died | .706 | .029 | 80 | 83 |
| 206 | 61.510 | Alive | . | . | 80 | 82 |
| 207 | 61.840 | Alive | . | . | 80 | 81 |
| 208 | 61.840 | Alive | . | . | 80 | 80 |
| 209 | 61.840 | Alive | . | . | 80 | 79 |
| 210 | 62.140 | Alive | . | . | 80 | 78 |
| 211 | 62.400 | Alive | . | . | 80 | 77 |
| 212 | 62.800 | Alive | . | . | 80 | 76 |
| 213 | 62.800 | Alive | . | . | 80 | 75 |
| 214 | 63.060 | Alive | . | . | 80 | 74 |
| 215 | 63.320 | Alive | . | . | 80 | 73 |
| 216 | 63.590 | Alive | . | . | 80 | 72 |
| 217 | 63.850 | Alive | . | . | 80 | 71 |
| 218 | 63.910 | Died | .696 | .030 | 81 | 70 |
| 219 | 64.510 | Alive | . | . | 81 | 69 |
| 220 | 64.640 | Alive | . | . | 81 | 68 |
| 221 | 64.800 | Alive | . | . | 81 | 67 |
| 222 | 65.330 | Alive | . | . | 81 | 66 |
| 223 | 65.560 | Alive | . | . | 81 | 65 |
| 224 | 66.090 | Alive | . | . | 81 | 64 |
| 225 | 66.280 | Alive | . | . | 81 | 63 |
| 226 | 67.040 | Alive | . | . | 81 | 62 |
| 227 | 67.340 | Alive | . | . | 81 | 61 |
| 228 | 67.830 | Alive | . | . | 81 | 60 |
| 229 | 68.090 | Alive | . | . | 81 | 59 |
| 230 | 68.850 | Alive | . | . | 81 | 58 |
| 231 | 68.850 | Alive | . | . | 81 | 57 |
| 232 | 69.570 | Alive | . | . | 81 | 56 |
| 233 | 69.700 | Alive | . | . | 81 | 55 |
| 234 | 70.390 | Alive | . | . | 81 | 54 |
| 235 | 71.320 | Alive | . | . | 81 | 53 |
| 236 | 71.710 | Died | .683 | .032 | 82 | 52 |
| 237 | 72.340 | Alive | . | . | 82 | 51 |
| 238 | 72.370 | Alive | . | . | 82 | 50 |
| 239 | 73.030 | Alive | . | . | 82 | 49 |
| 240 | 73.060 | Alive | . | . | 82 | 48 |
| 241 | 73.910 | Alive | . | . | 82 | 47 |
| 242 | 74.080 | Died | .669 | .034 | 83 | 46 |
| 243 | 74.110 | Alive | . | . | 83 | 45 |
| 244 | 74.640 | Alive | . | . | 83 | 44 |
| 245 | 75.160 | Alive | . | . | 83 | 43 |
| 246 | 75.720 | Alive | . | . | 83 | 42 |
| 247 | 75.820 | Alive | . | . | 83 | 41 |
| 248 | 75.920 | Alive | . | . | 83 | 40 |
| 249 | 76.150 | Alive | . | . | 83 | 39 |
| 250 | 76.250 | Alive | . | . | 83 | 38 |
| 251 | 76.450 | Alive | . | . | 83 | 37 |
| 252 | 76.640 | Alive | . | . | 83 | 36 |
| 253 | 78.850 | Alive | . | . | 83 | 35 |
| 254 | 79.800 | Alive | . | . | 83 | 34 |
| 255 | 79.840 | Alive | . | . | 83 | 33 |
| 256 | 79.870 | Alive | . | . | 83 | 32 |
| 257 | 80.890 | Alive | . | . | 83 | 31 |
| 258 | 80.950 | Alive | . | . | 83 | 30 |
| 259 | 81.090 | Alive | . | . | 83 | 29 |
| 260 | 81.780 | Alive | . | . | 83 | 28 |
| 261 | 81.970 | Died | .645 | .041 | 84 | 27 |
| 262 | 83.160 | Alive | . | . | 84 | 26 |
| 263 | 85.260 | Alive | . | . | 84 | 25 |
| 264 | 85.890 | Alive | . | . | 84 | 24 |
| 265 | 87.630 | Alive | . | . | 84 | 23 |
| 266 | 88.130 | Alive | . | . | 84 | 22 |
| 267 | 88.190 | Alive | . | . | 84 | 21 |
| 268 | 88.220 | Alive | . | . | 84 | 20 |
| 269 | 88.720 | Alive | . | . | 84 | 19 |
| 270 | 88.720 | Alive | . | . | 84 | 18 |
| 271 | 89.050 | Alive | . | . | 84 | 17 |
| 272 | 89.080 | Alive | . | . | 84 | 16 |
| 273 | 90.000 | Alive | . | . | 84 | 15 |
| 274 | 90.820 | Alive | . | . | 84 | 14 |
| 275 | 91.220 | Alive | . | . | 84 | 13 |
| 276 | 91.380 | Alive | . | . | 84 | 12 |
| 277 | 92.430 | Alive | . | . | 84 | 11 |
| 278 | 92.730 | Alive | . | . | 84 | 10 |
| 279 | 94.340 | Alive | . | . | 84 | 9 |
| 280 | 95.230 | Alive | . | . | 84 | 8 |
| 281 | 95.720 | Alive | . | . | 84 | 7 |
| 282 | 96.250 | Alive | . | . | 84 | 6 |
| 283 | 97.040 | Alive | . | . | 84 | 5 |
| 284 | 98.590 | Alive | . | . | 84 | 4 |
| 285 | 98.820 | Alive | . | . | 84 | 3 |
| 286 | 100.660 | Alive | . | . | 84 | 2 |
| 287 | 102.400 | Alive | . | . | 84 | 1 |
| 288 | 104.050 | Alive | . | . | 84 | 0 |
| CNS II, TLP | 1 | .490 | Died | .977 | .023 | 1 | 42 |
| 2 | .560 | Died | .953 | .032 | 2 | 41 |
| 3 | .760 | Died | .930 | .039 | 3 | 40 |
| 4 | .790 | Died | .907 | .044 | 4 | 39 |
| 5 | 1.020 | Died | .884 | .049 | 5 | 38 |
| 6 | 5.390 | Died | .860 | .053 | 6 | 37 |
| 7 | 5.890 | Died | .837 | .056 | 7 | 36 |
| 8 | 6.510 | Died | .814 | .059 | 8 | 35 |
| 9 | 13.060 | Died | .791 | .062 | 9 | 34 |
| 10 | 15.230 | Died | .767 | .064 | 10 | 33 |
| 11 | 17.340 | Died | .744 | .067 | 11 | 32 |
| 12 | 22.240 | Died | .721 | .068 | 12 | 31 |
| 13 | 22.470 | Died | .698 | .070 | 13 | 30 |
| 14 | 24.310 | Died | .674 | .071 | 14 | 29 |
| 15 | 29.670 | Died | .651 | .073 | 15 | 28 |
| 16 | 31.840 | Died | .**628** | .074 | 16 | 27 |
| 17 | 39.240 | Alive | . | . | 16 | 26 |
| 18 | 40.590 | Alive | . | . | 16 | 25 |
| 19 | 42.270 | Alive | . | . | 16 | 24 |
| 20 | 44.080 | Alive | . | . | 16 | 23 |
| 21 | 46.580 | Alive | . | . | 16 | 22 |
| 22 | 48.030 | Alive | . | . | 16 | 21 |
| 23 | 51.220 | Alive | . | . | 16 | 20 |
| 24 | 57.270 | Alive | . | . | 16 | 19 |
| 25 | 57.430 | Alive | . | . | 16 | 18 |
| 26 | 58.060 | Alive | . | . | 16 | 17 |
| 27 | 59.240 | Alive | . | . | 16 | 16 |
| 28 | 60.530 | Alive | . | . | 16 | 15 |
| 29 | 62.140 | Alive | . | . | 16 | 14 |
| 30 | 64.900 | Alive | . | . | 16 | 13 |
| 31 | 69.240 | Alive | . | . | 16 | 12 |
| 32 | 70.590 | Alive | . | . | 16 | 11 |
| 33 | 71.380 | Alive | . | . | 16 | 10 |
| 34 | 80.000 | Alive | . | . | 16 | 9 |
| 35 | 80.100 | Alive | . | . | 16 | 8 |
| 36 | 82.760 | Alive | . | . | 16 | 7 |
| 37 | 86.640 | Alive | . | . | 16 | 6 |
| 38 | 87.200 | Alive | . | . | 16 | 5 |
| 39 | 91.510 | Alive | . | . | 16 | 4 |
| 40 | 97.140 | Alive | . | . | 16 | 3 |
| 41 | 97.170 | Alive | . | . | 16 | 2 |
| 42 | 98.130 | Alive | . | . | 16 | 1 |
| 43 | 99.900 | Alive | . | . | 16 | 0 |

| **Overall Comparisons** | | | |
| --- | --- | --- | --- |
|  | Chi-Square | df | P-value |
| Log Rank (Mantel-Cox) | .947 | 1 | .**331** |
| CNS.status1. | | | |


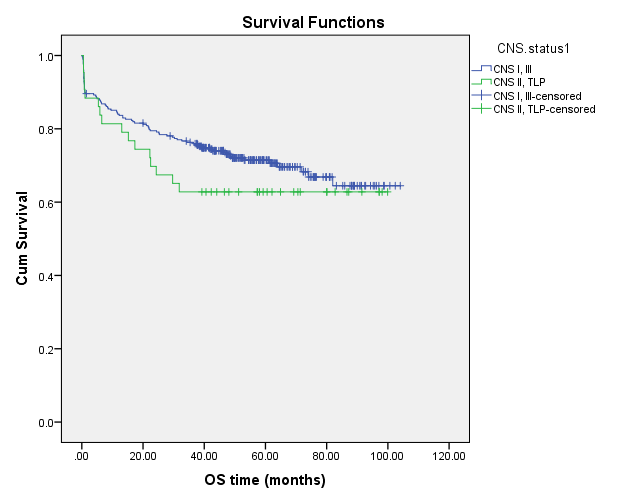


**Kaplan-Meier**

| **Case Processing Summary** | | | | |
| --- | --- | --- | --- | --- |
| BP.blasts | Total N | N of Events | Censored | |
| N | Percent |
| >= 50 | **129** | **45** | 84 | 65.1% |
| < 50 | **202** | **55** | 147 | 72.8% |
| Overall | 331 | 100 | 231 | 69.8% |

| **Survival Table** | | | | | | | |
| --- | --- | --- | --- | --- | --- | --- | --- |
| BP.blasts | | Time | Status | Cumulative Proportion Surviving at the Time | | N of Cumulative Events | N of Remaining Cases |
| Estimate | Std. Error |
| >= 50 | 1 | .330 | Died | .992 | .008 | 1 | 128 |
| 2 | .460 | Died | .984 | .011 | 2 | 127 |
| 3 | .490 | Died | .977 | .013 | 3 | 126 |
| 4 | .530 | Died | .969 | .015 | 4 | 125 |
| 5 | .560 | Died | .961 | .017 | 5 | 124 |
| 6 | .590 | Died | .953 | .019 | 6 | 123 |
| 7 | .630 | Died | . | . | 7 | 122 |
| 8 | .630 | Died | .938 | .021 | 8 | 121 |
| 9 | .690 | Died | .930 | .022 | 9 | 120 |
| 10 | .720 | Died | . | . | 10 | 119 |
| 11 | .720 | Died | .915 | .025 | 11 | 118 |
| 12 | .760 | Died | .907 | .026 | 12 | 117 |
| 13 | .820 | Died | .899 | .027 | 13 | 116 |
| 14 | .860 | Died | .891 | .027 | 14 | 115 |
| 15 | .890 | Died | .884 | .028 | 15 | 114 |
| 16 | .950 | Died | .876 | .029 | 16 | 113 |
| 17 | 4.570 | Died | .868 | .030 | 17 | 112 |
| 18 | 4.970 | Died | .860 | .031 | 18 | 111 |
| 19 | 5.390 | Died | .853 | .031 | 19 | 110 |
| 20 | 5.760 | Died | .845 | .032 | 20 | 109 |
| 21 | 6.410 | Died | .837 | .033 | 21 | 108 |
| 22 | 6.510 | Died | .829 | .033 | 22 | 107 |
| 23 | 7.990 | Died | .822 | .034 | 23 | 106 |
| 24 | 8.590 | Died | .814 | .034 | 24 | 105 |
| 25 | 11.380 | Died | .806 | .035 | 25 | 104 |
| 26 | 11.510 | Died | .798 | .035 | 26 | 103 |
| 27 | 11.680 | Died | .791 | .036 | 27 | 102 |
| 28 | 14.310 | Died | .783 | .036 | 28 | 101 |
| 29 | 16.280 | Died | .775 | .037 | 29 | 100 |
| 30 | 17.240 | Died | .767 | .037 | 30 | 99 |
| 31 | 21.910 | Died | .760 | .038 | 31 | 98 |
| 32 | 22.470 | Died | .752 | .038 | 32 | 97 |
| 33 | 24.410 | Died | .744 | .038 | 33 | 96 |
| 34 | 25.200 | Died | .736 | .039 | 34 | 95 |
| 35 | 25.300 | Died | .729 | .039 | 35 | 94 |
| 36 | 28.850 | Alive | . | . | 35 | 93 |
| 37 | 31.150 | Died | .721 | .040 | 36 | 92 |
| 38 | 34.280 | Died | .713 | .040 | 37 | 91 |
| 39 | 37.600 | Alive | . | . | 37 | 90 |
| 40 | 37.660 | Alive | . | . | 37 | 89 |
| 41 | 37.760 | Alive | . | . | 37 | 88 |
| 42 | 37.830 | Alive | . | . | 37 | 87 |
| 43 | 37.860 | Alive | . | . | 37 | 86 |
| 44 | 38.390 | Died | .705 | .040 | 38 | 85 |
| 45 | 38.390 | Alive | . | . | 38 | 84 |
| 46 | 39.210 | Died | .696 | .041 | 39 | 83 |
| 47 | 39.340 | Alive | . | . | 39 | 82 |
| 48 | 39.510 | Alive | . | . | 39 | 81 |
| 49 | 39.700 | Alive | . | . | 39 | 80 |
| 50 | 39.740 | Alive | . | . | 39 | 79 |
| 51 | 39.970 | Alive | . | . | 39 | 78 |
| 52 | 40.590 | Alive | . | . | 39 | 77 |
| 53 | 41.380 | Alive | . | . | 39 | 76 |
| 54 | 41.710 | Alive | . | . | 39 | 75 |
| 55 | 42.270 | Alive | . | . | 39 | 74 |
| 56 | 42.500 | Alive | . | . | 39 | 73 |
| 57 | 42.760 | Alive | . | . | 39 | 72 |
| 58 | 43.420 | Alive | . | . | 39 | 71 |
| 59 | 43.590 | Alive | . | . | 39 | 70 |
| 60 | 43.650 | Alive | . | . | 39 | 69 |
| 61 | 44.080 | Alive | . | . | 39 | 68 |
| 62 | 45.230 | Alive | . | . | 39 | 67 |
| 63 | 45.790 | Alive | . | . | 39 | 66 |
| 64 | 46.050 | Alive | . | . | 39 | 65 |
| 65 | 46.120 | Alive | . | . | 39 | 64 |
| 66 | 46.740 | Died | .685 | .041 | 40 | 63 |
| 67 | 46.910 | Died | .675 | .042 | 41 | 62 |
| 68 | 47.270 | Alive | . | . | 41 | 61 |
| 69 | 48.030 | Alive | . | . | 41 | 60 |
| 70 | 48.190 | Alive | . | . | 41 | 59 |
| 71 | 48.450 | Alive | . | . | 41 | 58 |
| 72 | 48.650 | Alive | . | . | 41 | 57 |
| 73 | 49.010 | Died | .663 | .043 | 42 | 56 |
| 74 | 49.180 | Alive | . | . | 42 | 55 |
| 75 | 49.240 | Alive | . | . | 42 | 54 |
| 76 | 49.280 | Alive | . | . | 42 | 53 |
| 77 | 49.410 | Alive | . | . | 42 | 52 |
| 78 | 49.800 | Alive | . | . | 42 | 51 |
| 79 | 50.260 | Alive | . | . | 42 | 50 |
| 80 | 51.880 | Alive | . | . | 42 | 49 |
| 81 | 52.270 | Alive | . | . | 42 | 48 |
| 82 | 52.430 | Alive | . | . | 42 | 47 |
| 83 | 53.060 | Died | **.649** | .044 | 43 | 46 |
| 84 | 53.090 | Alive | . | . | 43 | 45 |
| 85 | 54.440 | Alive | . | . | 43 | 44 |
| 86 | 54.540 | Alive | . | . | 43 | 43 |
| 87 | 55.200 | Alive | . | . | 43 | 42 |
| 88 | 55.530 | Alive | . | . | 43 | 41 |
| 89 | 56.280 | Alive | . | . | 43 | 40 |
| 90 | 56.510 | Alive | . | . | 43 | 39 |
| 91 | 57.040 | Alive | . | . | 43 | 38 |
| 92 | 57.430 | Alive | . | . | 43 | 37 |
| 93 | 57.700 | Alive | . | . | 43 | 36 |
| 94 | 58.590 | Alive | . | . | 43 | 35 |
| 95 | 59.110 | Alive | . | . | 43 | 34 |
| 96 | 60.200 | Alive | . | . | 43 | 33 |
| 97 | 60.530 | Alive | . | . | 43 | 32 |
| 98 | 61.020 | Alive | . | . | 43 | 31 |
| 99 | 61.250 | Died | .628 | .048 | 44 | 30 |
| 100 | 62.140 | Alive | . | . | 44 | 29 |
| 101 | 63.910 | Died | .606 | .051 | 45 | 28 |
| 102 | 64.640 | Alive | . | . | 45 | 27 |
| 103 | 65.560 | Alive | . | . | 45 | 26 |
| 104 | 66.090 | Alive | . | . | 45 | 25 |
| 105 | 67.040 | Alive | . | . | 45 | 24 |
| 106 | 67.340 | Alive | . | . | 45 | 23 |
| 107 | 68.090 | Alive | . | . | 45 | 22 |
| 108 | 68.850 | Alive | . | . | 45 | 21 |
| 109 | 69.240 | Alive | . | . | 45 | 20 |
| 110 | 69.700 | Alive | . | . | 45 | 19 |
| 111 | 71.320 | Alive | . | . | 45 | 18 |
| 112 | 72.370 | Alive | . | . | 45 | 17 |
| 113 | 73.030 | Alive | . | . | 45 | 16 |
| 114 | 73.060 | Alive | . | . | 45 | 15 |
| 115 | 75.160 | Alive | . | . | 45 | 14 |
| 116 | 75.720 | Alive | . | . | 45 | 13 |
| 117 | 75.820 | Alive | . | . | 45 | 12 |
| 118 | 76.150 | Alive | . | . | 45 | 11 |
| 119 | 76.250 | Alive | . | . | 45 | 10 |
| 120 | 79.840 | Alive | . | . | 45 | 9 |
| 121 | 81.090 | Alive | . | . | 45 | 8 |
| 122 | 81.780 | Alive | . | . | 45 | 7 |
| 123 | 88.220 | Alive | . | . | 45 | 6 |
| 124 | 88.720 | Alive | . | . | 45 | 5 |
| 125 | 95.230 | Alive | . | . | 45 | 4 |
| 126 | 97.040 | Alive | . | . | 45 | 3 |
| 127 | 99.900 | Alive | . | . | 45 | 2 |
| 128 | 100.660 | Alive | . | . | 45 | 1 |
| 129 | 102.400 | Alive | . | . | 45 | 0 |
| < 50 | 1 | .100 | Died | .995 | .005 | 1 | 201 |
| 2 | .390 | Died | .990 | .007 | 2 | 200 |
| 3 | .460 | Died | . | . | 3 | 199 |
| 4 | .460 | Died | .980 | .010 | 4 | 198 |
| 5 | .490 | Died | .975 | .011 | 5 | 197 |
| 6 | .560 | Died | . | . | 6 | 196 |
| 7 | .560 | Died | . | . | 7 | 195 |
| 8 | .560 | Died | .960 | .014 | 8 | 194 |
| 9 | .630 | Died | . | . | 9 | 193 |
| 10 | .630 | Died | . | . | 10 | 192 |
| 11 | .630 | Died | .946 | .016 | 11 | 191 |
| 12 | .760 | Died | .941 | .017 | 12 | 190 |
| 13 | .790 | Died | . | . | 13 | 189 |
| 14 | .790 | Died | .931 | .018 | 14 | 188 |
| 15 | .890 | Died | .926 | .018 | 15 | 187 |
| 16 | .920 | Died | .921 | .019 | 16 | 186 |
| 17 | .950 | Died | .916 | .020 | 17 | 185 |
| 18 | 1.020 | Died | .911 | .020 | 18 | 184 |
| 19 | 1.120 | Died | .906 | .021 | 19 | 183 |
| 20 | 1.480 | Alive | . | . | 19 | 182 |
| 21 | 3.850 | Died | .901 | .021 | 20 | 181 |
| 22 | 4.740 | Died | .896 | .021 | 21 | 180 |
| 23 | 5.890 | Died | .891 | .022 | 22 | 179 |
| 24 | 6.120 | Died | .886 | .022 | 23 | 178 |
| 25 | 6.250 | Died | .881 | .023 | 24 | 177 |
| 26 | 7.660 | Died | .876 | .023 | 25 | 176 |
| 27 | 8.420 | Died | .871 | .024 | 26 | 175 |
| 28 | 9.540 | Died | .866 | .024 | 27 | 174 |
| 29 | 12.200 | Died | .861 | .024 | 28 | 173 |
| 30 | 13.060 | Died | .856 | .025 | 29 | 172 |
| 31 | 13.390 | Died | . | . | 30 | 171 |
| 32 | 13.390 | Died | .846 | .025 | 31 | 170 |
| 33 | 15.230 | Died | .841 | .026 | 32 | 169 |
| 34 | 16.680 | Died | .836 | .026 | 33 | 168 |
| 35 | 17.340 | Died | .831 | .026 | 34 | 167 |
| 36 | 19.970 | Alive | . | . | 34 | 166 |
| 37 | 20.000 | Died | .826 | .027 | 35 | 165 |
| 38 | 21.090 | Died | .821 | .027 | 36 | 164 |
| 39 | 21.680 | Died | .816 | .027 | 37 | 163 |
| 40 | 21.970 | Died | .811 | .028 | 38 | 162 |
| 41 | 22.240 | Died | .806 | .028 | 39 | 161 |
| 42 | 22.300 | Died | .801 | .028 | 40 | 160 |
| 43 | 24.310 | Died | .796 | .028 | 41 | 159 |
| 44 | 27.830 | Died | .791 | .029 | 42 | 158 |
| 45 | 29.570 | Died | .786 | .029 | 43 | 157 |
| 46 | 29.670 | Died | .781 | .029 | 44 | 156 |
| 47 | 30.230 | Died | .776 | .029 | 45 | 155 |
| 48 | 31.840 | Died | .771 | .030 | 46 | 154 |
| 49 | 32.700 | Died | .766 | .030 | 47 | 153 |
| 50 | 34.140 | Alive | . | . | 47 | 152 |
| 51 | 35.390 | Alive | . | . | 47 | 151 |
| 52 | 36.450 | Died | .761 | .030 | 48 | 150 |
| 53 | 37.010 | Alive | . | . | 48 | 149 |
| 54 | 37.600 | Alive | . | . | 48 | 148 |
| 55 | 37.630 | Alive | . | . | 48 | 147 |
| 56 | 37.660 | Died | .756 | .030 | 49 | 146 |
| 57 | 38.750 | Alive | . | . | 49 | 145 |
| 58 | 39.050 | Alive | . | . | 49 | 144 |
| 59 | 39.210 | Alive | . | . | 49 | 143 |
| 60 | 39.210 | Alive | . | . | 49 | 142 |
| 61 | 39.240 | Alive | . | . | 49 | 141 |
| 62 | 39.570 | Alive | . | . | 49 | 140 |
| 63 | 39.570 | Alive | . | . | 49 | 139 |
| 64 | 39.800 | Alive | . | . | 49 | 138 |
| 65 | 40.200 | Alive | . | . | 49 | 137 |
| 66 | 40.430 | Alive | . | . | 49 | 136 |
| 67 | 40.490 | Alive | . | . | 49 | 135 |
| 68 | 40.660 | Alive | . | . | 49 | 134 |
| 69 | 41.680 | Alive | . | . | 49 | 133 |
| 70 | 41.680 | Alive | . | . | 49 | 132 |
| 71 | 41.740 | Alive | . | . | 49 | 131 |
| 72 | 41.970 | Died | .750 | .031 | 50 | 130 |
| 73 | 41.970 | Alive | . | . | 50 | 129 |
| 74 | 42.430 | Alive | . | . | 50 | 128 |
| 75 | 42.700 | Died | .744 | .031 | 51 | 127 |
| 76 | 43.130 | Alive | . | . | 51 | 126 |
| 77 | 43.390 | Alive | . | . | 51 | 125 |
| 78 | 43.490 | Alive | . | . | 51 | 124 |
| 79 | 43.980 | Alive | . | . | 51 | 123 |
| 80 | 44.740 | Alive | . | . | 51 | 122 |
| 81 | 45.430 | Alive | . | . | 51 | 121 |
| 82 | 45.590 | Alive | . | . | 51 | 120 |
| 83 | 46.180 | Alive | . | . | 51 | 119 |
| 84 | 46.280 | Alive | . | . | 51 | 118 |
| 85 | 46.280 | Alive | . | . | 51 | 117 |
| 86 | 46.580 | Alive | . | . | 51 | 116 |
| 87 | 46.780 | Alive | . | . | 51 | 115 |
| 88 | 47.170 | Alive | . | . | 51 | 114 |
| 89 | 47.300 | Alive | . | . | 51 | 113 |
| 90 | 47.300 | Alive | . | . | 51 | 112 |
| 91 | 47.500 | Alive | . | . | 51 | 111 |
| 92 | 47.760 | Alive | . | . | 51 | 110 |
| 93 | 47.830 | Alive | . | . | 51 | 109 |
| 94 | 48.550 | Died | **.737** | .031 | 52 | 108 |
| 95 | 49.310 | Alive | . | . | 52 | 107 |
| 96 | 49.670 | Alive | . | . | 52 | 106 |
| 97 | 49.840 | Alive | . | . | 52 | 105 |
| 98 | 49.930 | Alive | . | . | 52 | 104 |
| 99 | 50.000 | Alive | . | . | 52 | 103 |
| 100 | 50.430 | Alive | . | . | 52 | 102 |
| 101 | 50.630 | Alive | . | . | 52 | 101 |
| 102 | 50.720 | Alive | . | . | 52 | 100 |
| 103 | 51.220 | Alive | . | . | 52 | 99 |
| 104 | 51.280 | Alive | . | . | 52 | 98 |
| 105 | 51.320 | Alive | . | . | 52 | 97 |
| 106 | 51.410 | Alive | . | . | 52 | 96 |
| 107 | 52.040 | Alive | . | . | 52 | 95 |
| 108 | 52.300 | Alive | . | . | 52 | 94 |
| 109 | 52.570 | Alive | . | . | 52 | 93 |
| 110 | 52.990 | Alive | . | . | 52 | 92 |
| 111 | 53.320 | Alive | . | . | 52 | 91 |
| 112 | 54.930 | Alive | . | . | 52 | 90 |
| 113 | 55.100 | Alive | . | . | 52 | 89 |
| 114 | 55.130 | Alive | . | . | 52 | 88 |
| 115 | 55.920 | Alive | . | . | 52 | 87 |
| 116 | 55.920 | Alive | . | . | 52 | 86 |
| 117 | 55.990 | Alive | . | . | 52 | 85 |
| 118 | 56.020 | Alive | . | . | 52 | 84 |
| 119 | 57.070 | Alive | . | . | 52 | 83 |
| 120 | 57.270 | Alive | . | . | 52 | 82 |
| 121 | 57.800 | Alive | . | . | 52 | 81 |
| 122 | 57.930 | Alive | . | . | 52 | 80 |
| 123 | 58.060 | Alive | . | . | 52 | 79 |
| 124 | 58.260 | Alive | . | . | 52 | 78 |
| 125 | 58.290 | Alive | . | . | 52 | 77 |
| 126 | 59.050 | Alive | . | . | 52 | 76 |
| 127 | 59.140 | Alive | . | . | 52 | 75 |
| 128 | 59.240 | Alive | . | . | 52 | 74 |
| 129 | 59.240 | Alive | . | . | 52 | 73 |
| 130 | 59.410 | Alive | . | . | 52 | 72 |
| 131 | 59.510 | Alive | . | . | 52 | 71 |
| 132 | 60.360 | Alive | . | . | 52 | 70 |
| 133 | 60.790 | Alive | . | . | 52 | 69 |
| 134 | 61.220 | Alive | . | . | 52 | 68 |
| 135 | 61.510 | Alive | . | . | 52 | 67 |
| 136 | 61.840 | Alive | . | . | 52 | 66 |
| 137 | 61.840 | Alive | . | . | 52 | 65 |
| 138 | 61.840 | Alive | . | . | 52 | 64 |
| 139 | 62.140 | Alive | . | . | 52 | 63 |
| 140 | 62.400 | Alive | . | . | 52 | 62 |
| 141 | 62.800 | Alive | . | . | 52 | 61 |
| 142 | 62.800 | Alive | . | . | 52 | 60 |
| 143 | 63.060 | Alive | . | . | 52 | 59 |
| 144 | 63.320 | Alive | . | . | 52 | 58 |
| 145 | 63.590 | Alive | . | . | 52 | 57 |
| 146 | 63.850 | Alive | . | . | 52 | 56 |
| 147 | 64.510 | Alive | . | . | 52 | 55 |
| 148 | 64.800 | Alive | . | . | 52 | 54 |
| 149 | 64.900 | Alive | . | . | 52 | 53 |
| 150 | 65.330 | Alive | . | . | 52 | 52 |
| 151 | 66.280 | Alive | . | . | 52 | 51 |
| 152 | 67.830 | Alive | . | . | 52 | 50 |
| 153 | 68.850 | Alive | . | . | 52 | 49 |
| 154 | 69.570 | Alive | . | . | 52 | 48 |
| 155 | 70.390 | Alive | . | . | 52 | 47 |
| 156 | 70.590 | Alive | . | . | 52 | 46 |
| 157 | 71.380 | Alive | . | . | 52 | 45 |
| 158 | 71.710 | Died | .721 | .035 | 53 | 44 |
| 159 | 72.340 | Alive | . | . | 53 | 43 |
| 160 | 73.910 | Alive | . | . | 53 | 42 |
| 161 | 74.080 | Died | .704 | .038 | 54 | 41 |
| 162 | 74.110 | Alive | . | . | 54 | 40 |
| 163 | 74.640 | Alive | . | . | 54 | 39 |
| 164 | 75.920 | Alive | . | . | 54 | 38 |
| 165 | 76.450 | Alive | . | . | 54 | 37 |
| 166 | 76.640 | Alive | . | . | 54 | 36 |
| 167 | 78.850 | Alive | . | . | 54 | 35 |
| 168 | 79.800 | Alive | . | . | 54 | 34 |
| 169 | 79.870 | Alive | . | . | 54 | 33 |
| 170 | 80.000 | Alive | . | . | 54 | 32 |
| 171 | 80.100 | Alive | . | . | 54 | 31 |
| 172 | 80.890 | Alive | . | . | 54 | 30 |
| 173 | 80.950 | Alive | . | . | 54 | 29 |
| 174 | 81.970 | Died | .680 | .044 | 55 | 28 |
| 175 | 82.760 | Alive | . | . | 55 | 27 |
| 176 | 83.160 | Alive | . | . | 55 | 26 |
| 177 | 85.260 | Alive | . | . | 55 | 25 |
| 178 | 85.890 | Alive | . | . | 55 | 24 |
| 179 | 86.640 | Alive | . | . | 55 | 23 |
| 180 | 87.200 | Alive | . | . | 55 | 22 |
| 181 | 87.630 | Alive | . | . | 55 | 21 |
| 182 | 88.130 | Alive | . | . | 55 | 20 |
| 183 | 88.190 | Alive | . | . | 55 | 19 |
| 184 | 88.720 | Alive | . | . | 55 | 18 |
| 185 | 89.050 | Alive | . | . | 55 | 17 |
| 186 | 89.080 | Alive | . | . | 55 | 16 |
| 187 | 90.000 | Alive | . | . | 55 | 15 |
| 188 | 90.820 | Alive | . | . | 55 | 14 |
| 189 | 91.220 | Alive | . | . | 55 | 13 |
| 190 | 91.380 | Alive | . | . | 55 | 12 |
| 191 | 91.510 | Alive | . | . | 55 | 11 |
| 192 | 92.430 | Alive | . | . | 55 | 10 |
| 193 | 92.730 | Alive | . | . | 55 | 9 |
| 194 | 94.340 | Alive | . | . | 55 | 8 |
| 195 | 95.720 | Alive | . | . | 55 | 7 |
| 196 | 96.250 | Alive | . | . | 55 | 6 |
| 197 | 97.140 | Alive | . | . | 55 | 5 |
| 198 | 97.170 | Alive | . | . | 55 | 4 |
| 199 | 98.130 | Alive | . | . | 55 | 3 |
| 200 | 98.590 | Alive | . | . | 55 | 2 |
| 201 | 98.820 | Alive | . | . | 55 | 1 |
| 202 | 104.050 | Alive | . | . | 55 | 0 |

| **Overall Comparisons** | | | |
| --- | --- | --- | --- |
|  | Chi-Square | df | P-value |
| Log Rank (Mantel-Cox) | 2.556 | 1 | **.110** |
| BP.blasts. | | | |


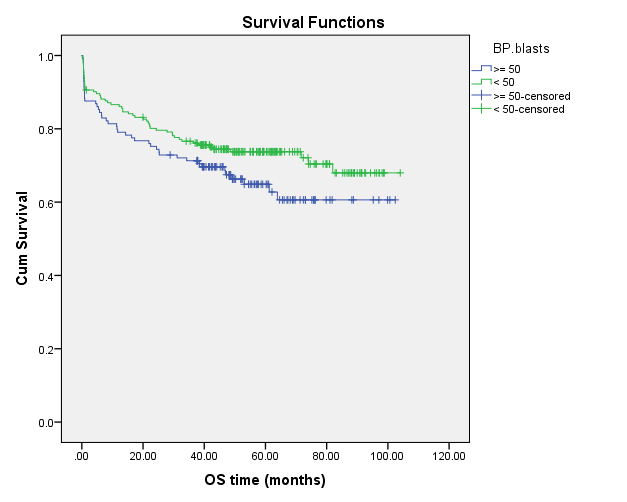


**Kaplan-Meier**

| **Case Processing Summary** | | | | |
| --- | --- | --- | --- | --- |
| Hb.gps | Total N | N of Events | Censored | |
| N | Percent |
| >= 10 | **54** | **17** | 37 | 68.5% |
| < 10 | **277** | **83** | 194 | 70.0% |
| Overall | 331 | 100 | 231 | 69.8% |

| **Survival Table** | | | | | | | |
| --- | --- | --- | --- | --- | --- | --- | --- |
| Hb.gps | | Time | Status | Cumulative Proportion Surviving at the Time | | N of Cumulative Events | N of Remaining Cases |
| Estimate | Std. Error |
| >= 10 | 1 | .490 | Died | . | . | 1 | 53 |
| 2 | .490 | Died | .963 | .026 | 2 | 52 |
| 3 | .560 | Died | .944 | .031 | 3 | 51 |
| 4 | .630 | Died | . | . | 4 | 50 |
| 5 | .630 | Died | .907 | .039 | 5 | 49 |
| 6 | .720 | Died | .889 | .043 | 6 | 48 |
| 7 | .920 | Died | .870 | .046 | 7 | 47 |
| 8 | 5.760 | Died | .852 | .048 | 8 | 46 |
| 9 | 5.890 | Died | .833 | .051 | 9 | 45 |
| 10 | 6.250 | Died | .815 | .053 | 10 | 44 |
| 11 | 6.510 | Died | .796 | .055 | 11 | 43 |
| 12 | 16.280 | Died | .778 | .057 | 12 | 42 |
| 13 | 16.680 | Died | .759 | .058 | 13 | 41 |
| 14 | 20.000 | Died | .741 | .060 | 14 | 40 |
| 15 | 27.830 | Died | .722 | .061 | 15 | 39 |
| 16 | 34.280 | Died | .704 | .062 | 16 | 38 |
| 17 | 36.450 | Died | .**685** | .063 | 17 | 37 |
| 18 | 37.600 | Alive | . | . | 17 | 36 |
| 19 | 39.240 | Alive | . | . | 17 | 35 |
| 20 | 39.740 | Alive | . | . | 17 | 34 |
| 21 | 40.200 | Alive | . | . | 17 | 33 |
| 22 | 41.680 | Alive | . | . | 17 | 32 |
| 23 | 41.710 | Alive | . | . | 17 | 31 |
| 24 | 41.740 | Alive | . | . | 17 | 30 |
| 25 | 42.430 | Alive | . | . | 17 | 29 |
| 26 | 42.760 | Alive | . | . | 17 | 28 |
| 27 | 46.120 | Alive | . | . | 17 | 27 |
| 28 | 46.780 | Alive | . | . | 17 | 26 |
| 29 | 47.300 | Alive | . | . | 17 | 25 |
| 30 | 48.030 | Alive | . | . | 17 | 24 |
| 31 | 48.650 | Alive | . | . | 17 | 23 |
| 32 | 51.280 | Alive | . | . | 17 | 22 |
| 33 | 52.300 | Alive | . | . | 17 | 21 |
| 34 | 52.430 | Alive | . | . | 17 | 20 |
| 35 | 53.320 | Alive | . | . | 17 | 19 |
| 36 | 54.440 | Alive | . | . | 17 | 18 |
| 37 | 54.930 | Alive | . | . | 17 | 17 |
| 38 | 55.200 | Alive | . | . | 17 | 16 |
| 39 | 56.020 | Alive | . | . | 17 | 15 |
| 40 | 57.070 | Alive | . | . | 17 | 14 |
| 41 | 58.290 | Alive | . | . | 17 | 13 |
| 42 | 61.840 | Alive | . | . | 17 | 12 |
| 43 | 62.140 | Alive | . | . | 17 | 11 |
| 44 | 64.510 | Alive | . | . | 17 | 10 |
| 45 | 65.330 | Alive | . | . | 17 | 9 |
| 46 | 67.830 | Alive | . | . | 17 | 8 |
| 47 | 68.850 | Alive | . | . | 17 | 7 |
| 48 | 70.390 | Alive | . | . | 17 | 6 |
| 49 | 71.380 | Alive | . | . | 17 | 5 |
| 50 | 75.920 | Alive | . | . | 17 | 4 |
| 51 | 79.800 | Alive | . | . | 17 | 3 |
| 52 | 87.200 | Alive | . | . | 17 | 2 |
| 53 | 98.820 | Alive | . | . | 17 | 1 |
| 54 | 104.050 | Alive | . | . | 17 | 0 |
| < 10 | 1 | .100 | Died | .996 | .004 | 1 | 276 |
| 2 | .330 | Died | .993 | .005 | 2 | 275 |
| 3 | .390 | Died | .989 | .006 | 3 | 274 |
| 4 | .460 | Died | . | . | 4 | 273 |
| 5 | .460 | Died | . | . | 5 | 272 |
| 6 | .460 | Died | .978 | .009 | 6 | 271 |
| 7 | .530 | Died | .975 | .009 | 7 | 270 |
| 8 | .560 | Died | . | . | 8 | 269 |
| 9 | .560 | Died | . | . | 9 | 268 |
| 10 | .560 | Died | .964 | .011 | 10 | 267 |
| 11 | .590 | Died | .960 | .012 | 11 | 266 |
| 12 | .630 | Died | . | . | 12 | 265 |
| 13 | .630 | Died | . | . | 13 | 264 |
| 14 | .630 | Died | .949 | .013 | 14 | 263 |
| 15 | .690 | Died | .946 | .014 | 15 | 262 |
| 16 | .720 | Died | .942 | .014 | 16 | 261 |
| 17 | .760 | Died | . | . | 17 | 260 |
| 18 | .760 | Died | .935 | .015 | 18 | 259 |
| 19 | .790 | Died | . | . | 19 | 258 |
| 20 | .790 | Died | .928 | .016 | 20 | 257 |
| 21 | .820 | Died | .924 | .016 | 21 | 256 |
| 22 | .860 | Died | .921 | .016 | 22 | 255 |
| 23 | .890 | Died | . | . | 23 | 254 |
| 24 | .890 | Died | .913 | .017 | 24 | 253 |
| 25 | .950 | Died | . | . | 25 | 252 |
| 26 | .950 | Died | .906 | .018 | 26 | 251 |
| 27 | 1.020 | Died | .903 | .018 | 27 | 250 |
| 28 | 1.120 | Died | .899 | .018 | 28 | 249 |
| 29 | 1.480 | Alive | . | . | 28 | 248 |
| 30 | 3.850 | Died | .895 | .018 | 29 | 247 |
| 31 | 4.570 | Died | .892 | .019 | 30 | 246 |
| 32 | 4.740 | Died | .888 | .019 | 31 | 245 |
| 33 | 4.970 | Died | .884 | .019 | 32 | 244 |
| 34 | 5.390 | Died | .881 | .019 | 33 | 243 |
| 35 | 6.120 | Died | .877 | .020 | 34 | 242 |
| 36 | 6.410 | Died | .874 | .020 | 35 | 241 |
| 37 | 7.660 | Died | .870 | .020 | 36 | 240 |
| 38 | 7.990 | Died | .866 | .020 | 37 | 239 |
| 39 | 8.420 | Died | .863 | .021 | 38 | 238 |
| 40 | 8.590 | Died | .859 | .021 | 39 | 237 |
| 41 | 9.540 | Died | .855 | .021 | 40 | 236 |
| 42 | 11.380 | Died | .852 | .021 | 41 | 235 |
| 43 | 11.510 | Died | .848 | .022 | 42 | 234 |
| 44 | 11.680 | Died | .845 | .022 | 43 | 233 |
| 45 | 12.200 | Died | .841 | .022 | 44 | 232 |
| 46 | 13.060 | Died | .837 | .022 | 45 | 231 |
| 47 | 13.390 | Died | . | . | 46 | 230 |
| 48 | 13.390 | Died | .830 | .023 | 47 | 229 |
| 49 | 14.310 | Died | .826 | .023 | 48 | 228 |
| 50 | 15.230 | Died | .823 | .023 | 49 | 227 |
| 51 | 17.240 | Died | .819 | .023 | 50 | 226 |
| 52 | 17.340 | Died | .816 | .023 | 51 | 225 |
| 53 | 19.970 | Alive | . | . | 51 | 224 |
| 54 | 21.090 | Died | .812 | .024 | 52 | 223 |
| 55 | 21.680 | Died | .808 | .024 | 53 | 222 |
| 56 | 21.910 | Died | .805 | .024 | 54 | 221 |
| 57 | 21.970 | Died | .801 | .024 | 55 | 220 |
| 58 | 22.240 | Died | .797 | .024 | 56 | 219 |
| 59 | 22.300 | Died | .794 | .024 | 57 | 218 |
| 60 | 22.470 | Died | .790 | .025 | 58 | 217 |
| 61 | 24.310 | Died | .786 | .025 | 59 | 216 |
| 62 | 24.410 | Died | .783 | .025 | 60 | 215 |
| 63 | 25.200 | Died | .779 | .025 | 61 | 214 |
| 64 | 25.300 | Died | .776 | .025 | 62 | 213 |
| 65 | 28.850 | Alive | . | . | 62 | 212 |
| 66 | 29.570 | Died | .772 | .025 | 63 | 211 |
| 67 | 29.670 | Died | .768 | .025 | 64 | 210 |
| 68 | 30.230 | Died | .765 | .026 | 65 | 209 |
| 69 | 31.150 | Died | .761 | .026 | 66 | 208 |
| 70 | 31.840 | Died | .757 | .026 | 67 | 207 |
| 71 | 32.700 | Died | .754 | .026 | 68 | 206 |
| 72 | 34.140 | Alive | . | . | 68 | 205 |
| 73 | 35.390 | Alive | . | . | 68 | 204 |
| 74 | 37.010 | Alive | . | . | 68 | 203 |
| 75 | 37.600 | Alive | . | . | 68 | 202 |
| 76 | 37.630 | Alive | . | . | 68 | 201 |
| 77 | 37.660 | Died | .750 | .026 | 69 | 200 |
| 78 | 37.660 | Alive | . | . | 69 | 199 |
| 79 | 37.760 | Alive | . | . | 69 | 198 |
| 80 | 37.830 | Alive | . | . | 69 | 197 |
| 81 | 37.860 | Alive | . | . | 69 | 196 |
| 82 | 38.390 | Died | .746 | .026 | 70 | 195 |
| 83 | 38.390 | Alive | . | . | 70 | 194 |
| 84 | 38.750 | Alive | . | . | 70 | 193 |
| 85 | 39.050 | Alive | . | . | 70 | 192 |
| 86 | 39.210 | Died | .742 | .026 | 71 | 191 |
| 87 | 39.210 | Alive | . | . | 71 | 190 |
| 88 | 39.210 | Alive | . | . | 71 | 189 |
| 89 | 39.340 | Alive | . | . | 71 | 188 |
| 90 | 39.510 | Alive | . | . | 71 | 187 |
| 91 | 39.570 | Alive | . | . | 71 | 186 |
| 92 | 39.570 | Alive | . | . | 71 | 185 |
| 93 | 39.700 | Alive | . | . | 71 | 184 |
| 94 | 39.800 | Alive | . | . | 71 | 183 |
| 95 | 39.970 | Alive | . | . | 71 | 182 |
| 96 | 40.430 | Alive | . | . | 71 | 181 |
| 97 | 40.490 | Alive | . | . | 71 | 180 |
| 98 | 40.590 | Alive | . | . | 71 | 179 |
| 99 | 40.660 | Alive | . | . | 71 | 178 |
| 100 | 41.380 | Alive | . | . | 71 | 177 |
| 101 | 41.680 | Alive | . | . | 71 | 176 |
| 102 | 41.970 | Died | .738 | .027 | 72 | 175 |
| 103 | 41.970 | Alive | . | . | 72 | 174 |
| 104 | 42.270 | Alive | . | . | 72 | 173 |
| 105 | 42.500 | Alive | . | . | 72 | 172 |
| 106 | 42.700 | Died | .734 | .027 | 73 | 171 |
| 107 | 43.130 | Alive | . | . | 73 | 170 |
| 108 | 43.390 | Alive | . | . | 73 | 169 |
| 109 | 43.420 | Alive | . | . | 73 | 168 |
| 110 | 43.490 | Alive | . | . | 73 | 167 |
| 111 | 43.590 | Alive | . | . | 73 | 166 |
| 112 | 43.650 | Alive | . | . | 73 | 165 |
| 113 | 43.980 | Alive | . | . | 73 | 164 |
| 114 | 44.080 | Alive | . | . | 73 | 163 |
| 115 | 44.740 | Alive | . | . | 73 | 162 |
| 116 | 45.230 | Alive | . | . | 73 | 161 |
| 117 | 45.430 | Alive | . | . | 73 | 160 |
| 118 | 45.590 | Alive | . | . | 73 | 159 |
| 119 | 45.790 | Alive | . | . | 73 | 158 |
| 120 | 46.050 | Alive | . | . | 73 | 157 |
| 121 | 46.180 | Alive | . | . | 73 | 156 |
| 122 | 46.280 | Alive | . | . | 73 | 155 |
| 123 | 46.280 | Alive | . | . | 73 | 154 |
| 124 | 46.580 | Alive | . | . | 73 | 153 |
| 125 | 46.740 | Died | .729 | .027 | 74 | 152 |
| 126 | 46.910 | Died | .724 | .027 | 75 | 151 |
| 127 | 47.170 | Alive | . | . | 75 | 150 |
| 128 | 47.270 | Alive | . | . | 75 | 149 |
| 129 | 47.300 | Alive | . | . | 75 | 148 |
| 130 | 47.500 | Alive | . | . | 75 | 147 |
| 131 | 47.760 | Alive | . | . | 75 | 146 |
| 132 | 47.830 | Alive | . | . | 75 | 145 |
| 133 | 48.190 | Alive | . | . | 75 | 144 |
| 134 | 48.450 | Alive | . | . | 75 | 143 |
| 135 | 48.550 | Died | .719 | .028 | 76 | 142 |
| 136 | 49.010 | Died | .714 | .028 | 77 | 141 |
| 137 | 49.180 | Alive | . | . | 77 | 140 |
| 138 | 49.240 | Alive | . | . | 77 | 139 |
| 139 | 49.280 | Alive | . | . | 77 | 138 |
| 140 | 49.310 | Alive | . | . | 77 | 137 |
| 141 | 49.410 | Alive | . | . | 77 | 136 |
| 142 | 49.670 | Alive | . | . | 77 | 135 |
| 143 | 49.800 | Alive | . | . | 77 | 134 |
| 144 | 49.840 | Alive | . | . | 77 | 133 |
| 145 | 49.930 | Alive | . | . | 77 | 132 |
| 146 | 50.000 | Alive | . | . | 77 | 131 |
| 147 | 50.260 | Alive | . | . | 77 | 130 |
| 148 | 50.430 | Alive | . | . | 77 | 129 |
| 149 | 50.630 | Alive | . | . | 77 | 128 |
| 150 | 50.720 | Alive | . | . | 77 | 127 |
| 151 | 51.220 | Alive | . | . | 77 | 126 |
| 152 | 51.320 | Alive | . | . | 77 | 125 |
| 153 | 51.410 | Alive | . | . | 77 | 124 |
| 154 | 51.880 | Alive | . | . | 77 | 123 |
| 155 | 52.040 | Alive | . | . | 77 | 122 |
| 156 | 52.270 | Alive | . | . | 77 | 121 |
| 157 | 52.570 | Alive | . | . | 77 | 120 |
| 158 | 52.990 | Alive | . | . | 77 | 119 |
| 159 | 53.060 | Died | .**708** | .028 | 78 | 118 |
| 160 | 53.090 | Alive | . | . | 78 | 117 |
| 161 | 54.540 | Alive | . | . | 78 | 116 |
| 162 | 55.100 | Alive | . | . | 78 | 115 |
| 163 | 55.130 | Alive | . | . | 78 | 114 |
| 164 | 55.530 | Alive | . | . | 78 | 113 |
| 165 | 55.920 | Alive | . | . | 78 | 112 |
| 166 | 55.920 | Alive | . | . | 78 | 111 |
| 167 | 55.990 | Alive | . | . | 78 | 110 |
| 168 | 56.280 | Alive | . | . | 78 | 109 |
| 169 | 56.510 | Alive | . | . | 78 | 108 |
| 170 | 57.040 | Alive | . | . | 78 | 107 |
| 171 | 57.270 | Alive | . | . | 78 | 106 |
| 172 | 57.430 | Alive | . | . | 78 | 105 |
| 173 | 57.700 | Alive | . | . | 78 | 104 |
| 174 | 57.800 | Alive | . | . | 78 | 103 |
| 175 | 57.930 | Alive | . | . | 78 | 102 |
| 176 | 58.060 | Alive | . | . | 78 | 101 |
| 177 | 58.260 | Alive | . | . | 78 | 100 |
| 178 | 58.590 | Alive | . | . | 78 | 99 |
| 179 | 59.050 | Alive | . | . | 78 | 98 |
| 180 | 59.110 | Alive | . | . | 78 | 97 |
| 181 | 59.140 | Alive | . | . | 78 | 96 |
| 182 | 59.240 | Alive | . | . | 78 | 95 |
| 183 | 59.240 | Alive | . | . | 78 | 94 |
| 184 | 59.410 | Alive | . | . | 78 | 93 |
| 185 | 59.510 | Alive | . | . | 78 | 92 |
| 186 | 60.200 | Alive | . | . | 78 | 91 |
| 187 | 60.360 | Alive | . | . | 78 | 90 |
| 188 | 60.530 | Alive | . | . | 78 | 89 |
| 189 | 60.790 | Alive | . | . | 78 | 88 |
| 190 | 61.020 | Alive | . | . | 78 | 87 |
| 191 | 61.220 | Alive | . | . | 78 | 86 |
| 192 | 61.250 | Died | .700 | .029 | 79 | 85 |
| 193 | 61.510 | Alive | . | . | 79 | 84 |
| 194 | 61.840 | Alive | . | . | 79 | 83 |
| 195 | 61.840 | Alive | . | . | 79 | 82 |
| 196 | 62.140 | Alive | . | . | 79 | 81 |
| 197 | 62.400 | Alive | . | . | 79 | 80 |
| 198 | 62.800 | Alive | . | . | 79 | 79 |
| 199 | 62.800 | Alive | . | . | 79 | 78 |
| 200 | 63.060 | Alive | . | . | 79 | 77 |
| 201 | 63.320 | Alive | . | . | 79 | 76 |
| 202 | 63.590 | Alive | . | . | 79 | 75 |
| 203 | 63.850 | Alive | . | . | 79 | 74 |
| 204 | 63.910 | Died | .690 | .030 | 80 | 73 |
| 205 | 64.640 | Alive | . | . | 80 | 72 |
| 206 | 64.800 | Alive | . | . | 80 | 71 |
| 207 | 64.900 | Alive | . | . | 80 | 70 |
| 208 | 65.560 | Alive | . | . | 80 | 69 |
| 209 | 66.090 | Alive | . | . | 80 | 68 |
| 210 | 66.280 | Alive | . | . | 80 | 67 |
| 211 | 67.040 | Alive | . | . | 80 | 66 |
| 212 | 67.340 | Alive | . | . | 80 | 65 |
| 213 | 68.090 | Alive | . | . | 80 | 64 |
| 214 | 68.850 | Alive | . | . | 80 | 63 |
| 215 | 69.240 | Alive | . | . | 80 | 62 |
| 216 | 69.570 | Alive | . | . | 80 | 61 |
| 217 | 69.700 | Alive | . | . | 80 | 60 |
| 218 | 70.590 | Alive | . | . | 80 | 59 |
| 219 | 71.320 | Alive | . | . | 80 | 58 |
| 220 | 71.710 | Died | .678 | .032 | 81 | 57 |
| 221 | 72.340 | Alive | . | . | 81 | 56 |
| 222 | 72.370 | Alive | . | . | 81 | 55 |
| 223 | 73.030 | Alive | . | . | 81 | 54 |
| 224 | 73.060 | Alive | . | . | 81 | 53 |
| 225 | 73.910 | Alive | . | . | 81 | 52 |
| 226 | 74.080 | Died | .665 | .034 | 82 | 51 |
| 227 | 74.110 | Alive | . | . | 82 | 50 |
| 228 | 74.640 | Alive | . | . | 82 | 49 |
| 229 | 75.160 | Alive | . | . | 82 | 48 |
| 230 | 75.720 | Alive | . | . | 82 | 47 |
| 231 | 75.820 | Alive | . | . | 82 | 46 |
| 232 | 76.150 | Alive | . | . | 82 | 45 |
| 233 | 76.250 | Alive | . | . | 82 | 44 |
| 234 | 76.450 | Alive | . | . | 82 | 43 |
| 235 | 76.640 | Alive | . | . | 82 | 42 |
| 236 | 78.850 | Alive | . | . | 82 | 41 |
| 237 | 79.840 | Alive | . | . | 82 | 40 |
| 238 | 79.870 | Alive | . | . | 82 | 39 |
| 239 | 80.000 | Alive | . | . | 82 | 38 |
| 240 | 80.100 | Alive | . | . | 82 | 37 |
| 241 | 80.890 | Alive | . | . | 82 | 36 |
| 242 | 80.950 | Alive | . | . | 82 | 35 |
| 243 | 81.090 | Alive | . | . | 82 | 34 |
| 244 | 81.780 | Alive | . | . | 82 | 33 |
| 245 | 81.970 | Died | .645 | .038 | 83 | 32 |
| 246 | 82.760 | Alive | . | . | 83 | 31 |
| 247 | 83.160 | Alive | . | . | 83 | 30 |
| 248 | 85.260 | Alive | . | . | 83 | 29 |
| 249 | 85.890 | Alive | . | . | 83 | 28 |
| 250 | 86.640 | Alive | . | . | 83 | 27 |
| 251 | 87.630 | Alive | . | . | 83 | 26 |
| 252 | 88.130 | Alive | . | . | 83 | 25 |
| 253 | 88.190 | Alive | . | . | 83 | 24 |
| 254 | 88.220 | Alive | . | . | 83 | 23 |
| 255 | 88.720 | Alive | . | . | 83 | 22 |
| 256 | 88.720 | Alive | . | . | 83 | 21 |
| 257 | 89.050 | Alive | . | . | 83 | 20 |
| 258 | 89.080 | Alive | . | . | 83 | 19 |
| 259 | 90.000 | Alive | . | . | 83 | 18 |
| 260 | 90.820 | Alive | . | . | 83 | 17 |
| 261 | 91.220 | Alive | . | . | 83 | 16 |
| 262 | 91.380 | Alive | . | . | 83 | 15 |
| 263 | 91.510 | Alive | . | . | 83 | 14 |
| 264 | 92.430 | Alive | . | . | 83 | 13 |
| 265 | 92.730 | Alive | . | . | 83 | 12 |
| 266 | 94.340 | Alive | . | . | 83 | 11 |
| 267 | 95.230 | Alive | . | . | 83 | 10 |
| 268 | 95.720 | Alive | . | . | 83 | 9 |
| 269 | 96.250 | Alive | . | . | 83 | 8 |
| 270 | 97.040 | Alive | . | . | 83 | 7 |
| 271 | 97.140 | Alive | . | . | 83 | 6 |
| 272 | 97.170 | Alive | . | . | 83 | 5 |
| 273 | 98.130 | Alive | . | . | 83 | 4 |
| 274 | 98.590 | Alive | . | . | 83 | 3 |
| 275 | 99.900 | Alive | . | . | 83 | 2 |
| 276 | 100.660 | Alive | . | . | 83 | 1 |
| 277 | 102.400 | Alive | . | . | 83 | 0 |

| **Overall Comparisons** | | | |
| --- | --- | --- | --- |
|  | Chi-Square | df | P-value |
| Log Rank (Mantel-Cox) | .197 | 1 | **.657** |
| Hb.gps. | | | |


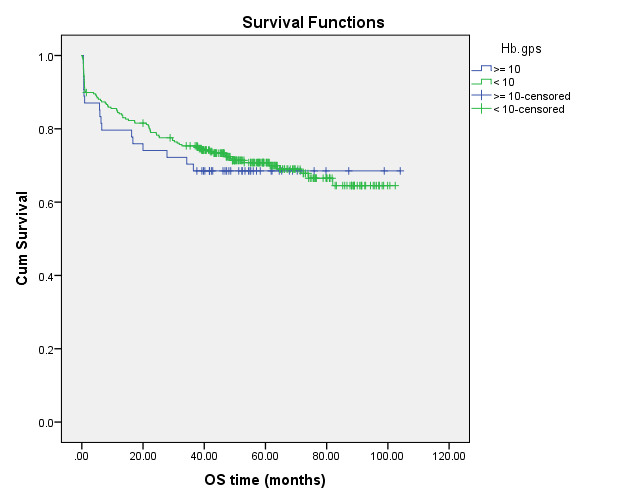


**Kaplan-Meier**

| **Case Processing Summary** | | | | |
| --- | --- | --- | --- | --- |
| TLC.gps | Total N | N of Events | Censored | |
| N | Percent |
| < 30 | **243** | **69** | 174 | 71.6% |
| 30-100 | **57** | **17** | 40 | 70.2% |
| > 100 | **31** | **14** | 17 | 54.8% |
| Overall | 331 | 100 | 231 | 69.8% |

| **Survival Table** | | | | | | | |
| --- | --- | --- | --- | --- | --- | --- | --- |
| TLC.gps | | Time | Status | Cumulative Proportion Surviving at the Time | | N of Cumulative Events | N of Remaining Cases |
| Estimate | Std. Error |
| < 30 | 1 | .100 | Died | .996 | .004 | 1 | 242 |
| 2 | .390 | Died | .992 | .006 | 2 | 241 |
| 3 | .460 | Died | . | . | 3 | 240 |
| 4 | .460 | Died | .984 | .008 | 4 | 239 |
| 5 | .490 | Died | . | . | 5 | 238 |
| 6 | .490 | Died | .975 | .010 | 6 | 237 |
| 7 | .530 | Died | .971 | .011 | 7 | 236 |
| 8 | .560 | Died | . | . | 8 | 235 |
| 9 | .560 | Died | .963 | .012 | 9 | 234 |
| 10 | .630 | Died | . | . | 10 | 233 |
| 11 | .630 | Died | . | . | 11 | 232 |
| 12 | .630 | Died | . | . | 12 | 231 |
| 13 | .630 | Died | .947 | .014 | 13 | 230 |
| 14 | .690 | Died | .942 | .015 | 14 | 229 |
| 15 | .760 | Died | .938 | .015 | 15 | 228 |
| 16 | .790 | Died | . | . | 16 | 227 |
| 17 | .790 | Died | .930 | .016 | 17 | 226 |
| 18 | .820 | Died | .926 | .017 | 18 | 225 |
| 19 | .890 | Died | . | . | 19 | 224 |
| 20 | .890 | Died | .918 | .018 | 20 | 223 |
| 21 | .920 | Died | .914 | .018 | 21 | 222 |
| 22 | .950 | Died | .909 | .018 | 22 | 221 |
| 23 | 1.020 | Died | .905 | .019 | 23 | 220 |
| 24 | 1.120 | Died | .901 | .019 | 24 | 219 |
| 25 | 3.850 | Died | .897 | .019 | 25 | 218 |
| 26 | 4.740 | Died | .893 | .020 | 26 | 217 |
| 27 | 4.970 | Died | .889 | .020 | 27 | 216 |
| 28 | 5.390 | Died | .885 | .020 | 28 | 215 |
| 29 | 5.890 | Died | .881 | .021 | 29 | 214 |
| 30 | 6.120 | Died | .877 | .021 | 30 | 213 |
| 31 | 6.250 | Died | .872 | .021 | 31 | 212 |
| 32 | 6.410 | Died | .868 | .022 | 32 | 211 |
| 33 | 7.660 | Died | .864 | .022 | 33 | 210 |
| 34 | 7.990 | Died | .860 | .022 | 34 | 209 |
| 35 | 8.420 | Died | .856 | .023 | 35 | 208 |
| 36 | 11.680 | Died | .852 | .023 | 36 | 207 |
| 37 | 12.200 | Died | .848 | .023 | 37 | 206 |
| 38 | 13.060 | Died | .844 | .023 | 38 | 205 |
| 39 | 14.310 | Died | .840 | .024 | 39 | 204 |
| 40 | 16.280 | Died | .835 | .024 | 40 | 203 |
| 41 | 17.240 | Died | .831 | .024 | 41 | 202 |
| 42 | 17.340 | Died | .827 | .024 | 42 | 201 |
| 43 | 19.970 | Alive | . | . | 42 | 200 |
| 44 | 20.000 | Died | .823 | .024 | 43 | 199 |
| 45 | 21.090 | Died | .819 | .025 | 44 | 198 |
| 46 | 21.680 | Died | .815 | .025 | 45 | 197 |
| 47 | 21.910 | Died | .811 | .025 | 46 | 196 |
| 48 | 21.970 | Died | .806 | .025 | 47 | 195 |
| 49 | 22.240 | Died | .802 | .026 | 48 | 194 |
| 50 | 22.300 | Died | .798 | .026 | 49 | 193 |
| 51 | 24.310 | Died | .794 | .026 | 50 | 192 |
| 52 | 24.410 | Died | .790 | .026 | 51 | 191 |
| 53 | 27.830 | Died | .786 | .026 | 52 | 190 |
| 54 | 28.850 | Alive | . | . | 52 | 189 |
| 55 | 29.570 | Died | .782 | .027 | 53 | 188 |
| 56 | 31.150 | Died | .777 | .027 | 54 | 187 |
| 57 | 31.840 | Died | .773 | .027 | 55 | 186 |
| 58 | 32.700 | Died | .769 | .027 | 56 | 185 |
| 59 | 34.140 | Alive | . | . | 56 | 184 |
| 60 | 34.280 | Died | .765 | .027 | 57 | 183 |
| 61 | 35.390 | Alive | . | . | 57 | 182 |
| 62 | 36.450 | Died | .761 | .027 | 58 | 181 |
| 63 | 37.010 | Alive | . | . | 58 | 180 |
| 64 | 37.600 | Alive | . | . | 58 | 179 |
| 65 | 37.630 | Alive | . | . | 58 | 178 |
| 66 | 37.660 | Died | .757 | .028 | 59 | 177 |
| 67 | 37.760 | Alive | . | . | 59 | 176 |
| 68 | 38.390 | Alive | . | . | 59 | 175 |
| 69 | 38.750 | Alive | . | . | 59 | 174 |
| 70 | 39.050 | Alive | . | . | 59 | 173 |
| 71 | 39.210 | Alive | . | . | 59 | 172 |
| 72 | 39.210 | Alive | . | . | 59 | 171 |
| 73 | 39.240 | Alive | . | . | 59 | 170 |
| 74 | 39.570 | Alive | . | . | 59 | 169 |
| 75 | 39.740 | Alive | . | . | 59 | 168 |
| 76 | 39.800 | Alive | . | . | 59 | 167 |
| 77 | 39.970 | Alive | . | . | 59 | 166 |
| 78 | 40.200 | Alive | . | . | 59 | 165 |
| 79 | 40.430 | Alive | . | . | 59 | 164 |
| 80 | 40.490 | Alive | . | . | 59 | 163 |
| 81 | 40.590 | Alive | . | . | 59 | 162 |
| 82 | 40.660 | Alive | . | . | 59 | 161 |
| 83 | 41.380 | Alive | . | . | 59 | 160 |
| 84 | 41.740 | Alive | . | . | 59 | 159 |
| 85 | 41.970 | Died | .752 | .028 | 60 | 158 |
| 86 | 41.970 | Alive | . | . | 60 | 157 |
| 87 | 42.430 | Alive | . | . | 60 | 156 |
| 88 | 42.700 | Died | .747 | .028 | 61 | 155 |
| 89 | 42.760 | Alive | . | . | 61 | 154 |
| 90 | 43.130 | Alive | . | . | 61 | 153 |
| 91 | 43.390 | Alive | . | . | 61 | 152 |
| 92 | 43.420 | Alive | . | . | 61 | 151 |
| 93 | 43.650 | Alive | . | . | 61 | 150 |
| 94 | 43.980 | Alive | . | . | 61 | 149 |
| 95 | 44.740 | Alive | . | . | 61 | 148 |
| 96 | 45.230 | Alive | . | . | 61 | 147 |
| 97 | 45.430 | Alive | . | . | 61 | 146 |
| 98 | 45.590 | Alive | . | . | 61 | 145 |
| 99 | 46.050 | Alive | . | . | 61 | 144 |
| 100 | 46.120 | Alive | . | . | 61 | 143 |
| 101 | 46.180 | Alive | . | . | 61 | 142 |
| 102 | 46.280 | Alive | . | . | 61 | 141 |
| 103 | 46.280 | Alive | . | . | 61 | 140 |
| 104 | 46.580 | Alive | . | . | 61 | 139 |
| 105 | 46.740 | Died | .742 | .028 | 62 | 138 |
| 106 | 46.780 | Alive | . | . | 62 | 137 |
| 107 | 47.170 | Alive | . | . | 62 | 136 |
| 108 | 47.270 | Alive | . | . | 62 | 135 |
| 109 | 47.300 | Alive | . | . | 62 | 134 |
| 110 | 47.300 | Alive | . | . | 62 | 133 |
| 111 | 47.760 | Alive | . | . | 62 | 132 |
| 112 | 47.830 | Alive | . | . | 62 | 131 |
| 113 | 48.030 | Alive | . | . | 62 | 130 |
| 114 | 48.190 | Alive | . | . | 62 | 129 |
| 115 | 49.010 | Died | .736 | .029 | 63 | 128 |
| 116 | 49.180 | Alive | . | . | 63 | 127 |
| 117 | 49.310 | Alive | . | . | 63 | 126 |
| 118 | 49.410 | Alive | . | . | 63 | 125 |
| 119 | 49.670 | Alive | . | . | 63 | 124 |
| 120 | 49.840 | Alive | . | . | 63 | 123 |
| 121 | 49.930 | Alive | . | . | 63 | 122 |
| 122 | 50.000 | Alive | . | . | 63 | 121 |
| 123 | 50.260 | Alive | . | . | 63 | 120 |
| 124 | 50.430 | Alive | . | . | 63 | 119 |
| 125 | 50.720 | Alive | . | . | 63 | 118 |
| 126 | 51.220 | Alive | . | . | 63 | 117 |
| 127 | 51.280 | Alive | . | . | 63 | 116 |
| 128 | 51.320 | Alive | . | . | 63 | 115 |
| 129 | 51.410 | Alive | . | . | 63 | 114 |
| 130 | 51.880 | Alive | . | . | 63 | 113 |
| 131 | 52.270 | Alive | . | . | 63 | 112 |
| 132 | 52.300 | Alive | . | . | 63 | 111 |
| 133 | 52.430 | Alive | . | . | 63 | 110 |
| 134 | 52.570 | Alive | . | . | 63 | 109 |
| 135 | 52.990 | Alive | . | . | 63 | 108 |
| 136 | 53.060 | Died | **.729** | .029 | 64 | 107 |
| 137 | 53.320 | Alive | . | . | 64 | 106 |
| 138 | 54.930 | Alive | . | . | 64 | 105 |
| 139 | 55.100 | Alive | . | . | 64 | 104 |
| 140 | 55.130 | Alive | . | . | 64 | 103 |
| 141 | 55.200 | Alive | . | . | 64 | 102 |
| 142 | 55.920 | Alive | . | . | 64 | 101 |
| 143 | 55.920 | Alive | . | . | 64 | 100 |
| 144 | 55.990 | Alive | . | . | 64 | 99 |
| 145 | 56.020 | Alive | . | . | 64 | 98 |
| 146 | 56.280 | Alive | . | . | 64 | 97 |
| 147 | 57.070 | Alive | . | . | 64 | 96 |
| 148 | 57.270 | Alive | . | . | 64 | 95 |
| 149 | 57.430 | Alive | . | . | 64 | 94 |
| 150 | 57.700 | Alive | . | . | 64 | 93 |
| 151 | 57.800 | Alive | . | . | 64 | 92 |
| 152 | 58.060 | Alive | . | . | 64 | 91 |
| 153 | 58.260 | Alive | . | . | 64 | 90 |
| 154 | 58.290 | Alive | . | . | 64 | 89 |
| 155 | 58.590 | Alive | . | . | 64 | 88 |
| 156 | 59.050 | Alive | . | . | 64 | 87 |
| 157 | 59.140 | Alive | . | . | 64 | 86 |
| 158 | 59.240 | Alive | . | . | 64 | 85 |
| 159 | 59.410 | Alive | . | . | 64 | 84 |
| 160 | 59.510 | Alive | . | . | 64 | 83 |
| 161 | 60.200 | Alive | . | . | 64 | 82 |
| 162 | 60.360 | Alive | . | . | 64 | 81 |
| 163 | 60.790 | Alive | . | . | 64 | 80 |
| 164 | 61.220 | Alive | . | . | 64 | 79 |
| 165 | 61.250 | Died | .720 | .030 | 65 | 78 |
| 166 | 61.510 | Alive | . | . | 65 | 77 |
| 167 | 61.840 | Alive | . | . | 65 | 76 |
| 168 | 61.840 | Alive | . | . | 65 | 75 |
| 169 | 61.840 | Alive | . | . | 65 | 74 |
| 170 | 62.140 | Alive | . | . | 65 | 73 |
| 171 | 62.140 | Alive | . | . | 65 | 72 |
| 172 | 62.400 | Alive | . | . | 65 | 71 |
| 173 | 62.800 | Alive | . | . | 65 | 70 |
| 174 | 62.800 | Alive | . | . | 65 | 69 |
| 175 | 63.060 | Alive | . | . | 65 | 68 |
| 176 | 63.320 | Alive | . | . | 65 | 67 |
| 177 | 63.590 | Alive | . | . | 65 | 66 |
| 178 | 63.850 | Alive | . | . | 65 | 65 |
| 179 | 63.910 | Died | .709 | .032 | 66 | 64 |
| 180 | 64.510 | Alive | . | . | 66 | 63 |
| 181 | 64.640 | Alive | . | . | 66 | 62 |
| 182 | 64.800 | Alive | . | . | 66 | 61 |
| 183 | 64.900 | Alive | . | . | 66 | 60 |
| 184 | 65.330 | Alive | . | . | 66 | 59 |
| 185 | 67.340 | Alive | . | . | 66 | 58 |
| 186 | 67.830 | Alive | . | . | 66 | 57 |
| 187 | 68.850 | Alive | . | . | 66 | 56 |
| 188 | 68.850 | Alive | . | . | 66 | 55 |
| 189 | 69.570 | Alive | . | . | 66 | 54 |
| 190 | 69.700 | Alive | . | . | 66 | 53 |
| 191 | 70.390 | Alive | . | . | 66 | 52 |
| 192 | 70.590 | Alive | . | . | 66 | 51 |
| 193 | 71.320 | Alive | . | . | 66 | 50 |
| 194 | 71.380 | Alive | . | . | 66 | 49 |
| 195 | 71.710 | Died | .694 | .034 | 67 | 48 |
| 196 | 72.340 | Alive | . | . | 67 | 47 |
| 197 | 73.030 | Alive | . | . | 67 | 46 |
| 198 | 73.910 | Alive | . | . | 67 | 45 |
| 199 | 74.080 | Died | .679 | .037 | 68 | 44 |
| 200 | 75.160 | Alive | . | . | 68 | 43 |
| 201 | 75.820 | Alive | . | . | 68 | 42 |
| 202 | 75.920 | Alive | . | . | 68 | 41 |
| 203 | 76.150 | Alive | . | . | 68 | 40 |
| 204 | 76.250 | Alive | . | . | 68 | 39 |
| 205 | 76.450 | Alive | . | . | 68 | 38 |
| 206 | 76.640 | Alive | . | . | 68 | 37 |
| 207 | 78.850 | Alive | . | . | 68 | 36 |
| 208 | 79.870 | Alive | . | . | 68 | 35 |
| 209 | 80.000 | Alive | . | . | 68 | 34 |
| 210 | 80.100 | Alive | . | . | 68 | 33 |
| 211 | 80.890 | Alive | . | . | 68 | 32 |
| 212 | 80.950 | Alive | . | . | 68 | 31 |
| 213 | 81.970 | Died | .657 | .042 | 69 | 30 |
| 214 | 83.160 | Alive | . | . | 69 | 29 |
| 215 | 85.260 | Alive | . | . | 69 | 28 |
| 216 | 85.890 | Alive | . | . | 69 | 27 |
| 217 | 86.640 | Alive | . | . | 69 | 26 |
| 218 | 87.200 | Alive | . | . | 69 | 25 |
| 219 | 87.630 | Alive | . | . | 69 | 24 |
| 220 | 88.130 | Alive | . | . | 69 | 23 |
| 221 | 88.190 | Alive | . | . | 69 | 22 |
| 222 | 88.720 | Alive | . | . | 69 | 21 |
| 223 | 89.050 | Alive | . | . | 69 | 20 |
| 224 | 89.080 | Alive | . | . | 69 | 19 |
| 225 | 90.000 | Alive | . | . | 69 | 18 |
| 226 | 90.820 | Alive | . | . | 69 | 17 |
| 227 | 91.220 | Alive | . | . | 69 | 16 |
| 228 | 91.380 | Alive | . | . | 69 | 15 |
| 229 | 92.430 | Alive | . | . | 69 | 14 |
| 230 | 92.730 | Alive | . | . | 69 | 13 |
| 231 | 94.340 | Alive | . | . | 69 | 12 |
| 232 | 95.230 | Alive | . | . | 69 | 11 |
| 233 | 95.720 | Alive | . | . | 69 | 10 |
| 234 | 96.250 | Alive | . | . | 69 | 9 |
| 235 | 97.040 | Alive | . | . | 69 | 8 |
| 236 | 97.140 | Alive | . | . | 69 | 7 |
| 237 | 97.170 | Alive | . | . | 69 | 6 |
| 238 | 98.130 | Alive | . | . | 69 | 5 |
| 239 | 98.590 | Alive | . | . | 69 | 4 |
| 240 | 98.820 | Alive | . | . | 69 | 3 |
| 241 | 99.900 | Alive | . | . | 69 | 2 |
| 242 | 102.400 | Alive | . | . | 69 | 1 |
| 243 | 104.050 | Alive | . | . | 69 | 0 |
| 30-100 | 1 | .560 | Died | . | . | 1 | 56 |
| 2 | .560 | Died | .965 | .024 | 2 | 55 |
| 3 | .590 | Died | .947 | .030 | 3 | 54 |
| 4 | .720 | Died | .930 | .034 | 4 | 53 |
| 5 | .760 | Died | .912 | .037 | 5 | 52 |
| 6 | .860 | Died | .895 | .041 | 6 | 51 |
| 7 | .950 | Died | .877 | .043 | 7 | 50 |
| 8 | 1.480 | Alive | . | . | 7 | 49 |
| 9 | 5.760 | Died | .859 | .046 | 8 | 48 |
| 10 | 6.510 | Died | .841 | .049 | 9 | 47 |
| 11 | 11.380 | Died | .823 | .051 | 10 | 46 |
| 12 | 16.680 | Died | .806 | .053 | 11 | 45 |
| 13 | 22.470 | Died | .788 | .054 | 12 | 44 |
| 14 | 25.300 | Died | .770 | .056 | 13 | 43 |
| 15 | 29.670 | Died | .752 | .058 | 14 | 42 |
| 16 | 30.230 | Died | .734 | .059 | 15 | 41 |
| 17 | 37.660 | Alive | . | . | 15 | 40 |
| 18 | 37.830 | Alive | . | . | 15 | 39 |
| 19 | 39.210 | Died | .715 | .060 | 16 | 38 |
| 20 | 39.340 | Alive | . | . | 16 | 37 |
| 21 | 39.570 | Alive | . | . | 16 | 36 |
| 22 | 39.700 | Alive | . | . | 16 | 35 |
| 23 | 41.680 | Alive | . | . | 16 | 34 |
| 24 | 41.710 | Alive | . | . | 16 | 33 |
| 25 | 42.500 | Alive | . | . | 16 | 32 |
| 26 | 43.490 | Alive | . | . | 16 | 31 |
| 27 | 44.080 | Alive | . | . | 16 | 30 |
| 28 | 45.790 | Alive | . | . | 16 | 29 |
| 29 | 46.910 | Died | **.690** | .063 | 17 | 28 |
| 30 | 47.500 | Alive | . | . | 17 | 27 |
| 31 | 48.450 | Alive | . | . | 17 | 26 |
| 32 | 48.650 | Alive | . | . | 17 | 25 |
| 33 | 49.240 | Alive | . | . | 17 | 24 |
| 34 | 49.280 | Alive | . | . | 17 | 23 |
| 35 | 49.800 | Alive | . | . | 17 | 22 |
| 36 | 50.630 | Alive | . | . | 17 | 21 |
| 37 | 52.040 | Alive | . | . | 17 | 20 |
| 38 | 53.090 | Alive | . | . | 17 | 19 |
| 39 | 57.040 | Alive | . | . | 17 | 18 |
| 40 | 59.110 | Alive | . | . | 17 | 17 |
| 41 | 59.240 | Alive | . | . | 17 | 16 |
| 42 | 61.020 | Alive | . | . | 17 | 15 |
| 43 | 66.090 | Alive | . | . | 17 | 14 |
| 44 | 67.040 | Alive | . | . | 17 | 13 |
| 45 | 68.090 | Alive | . | . | 17 | 12 |
| 46 | 69.240 | Alive | . | . | 17 | 11 |
| 47 | 72.370 | Alive | . | . | 17 | 10 |
| 48 | 73.060 | Alive | . | . | 17 | 9 |
| 49 | 74.640 | Alive | . | . | 17 | 8 |
| 50 | 79.800 | Alive | . | . | 17 | 7 |
| 51 | 79.840 | Alive | . | . | 17 | 6 |
| 52 | 81.780 | Alive | . | . | 17 | 5 |
| 53 | 82.760 | Alive | . | . | 17 | 4 |
| 54 | 88.220 | Alive | . | . | 17 | 3 |
| 55 | 88.720 | Alive | . | . | 17 | 2 |
| 56 | 91.510 | Alive | . | . | 17 | 1 |
| 57 | 100.660 | Alive | . | . | 17 | 0 |
| > 100 | 1 | .330 | Died | .968 | .032 | 1 | 30 |
| 2 | .460 | Died | .935 | .044 | 2 | 29 |
| 3 | .630 | Died | .903 | .053 | 3 | 28 |
| 4 | .720 | Died | .871 | .060 | 4 | 27 |
| 5 | 4.570 | Died | .839 | .066 | 5 | 26 |
| 6 | 8.590 | Died | .806 | .071 | 6 | 25 |
| 7 | 9.540 | Died | .774 | .075 | 7 | 24 |
| 8 | 11.510 | Died | .742 | .079 | 8 | 23 |
| 9 | 13.390 | Died | . | . | 9 | 22 |
| 10 | 13.390 | Died | .677 | .084 | 10 | 21 |
| 11 | 15.230 | Died | .645 | .086 | 11 | 20 |
| 12 | 25.200 | Died | .613 | .087 | 12 | 19 |
| 13 | 37.600 | Alive | . | . | 12 | 18 |
| 14 | 37.860 | Alive | . | . | 12 | 17 |
| 15 | 38.390 | Died | .577 | .089 | 13 | 16 |
| 16 | 39.510 | Alive | . | . | 13 | 15 |
| 17 | 41.680 | Alive | . | . | 13 | 14 |
| 18 | 42.270 | Alive | . | . | 13 | 13 |
| 19 | 43.590 | Alive | . | . | 13 | 12 |
| 20 | 48.550 | Died | **.529** | .094 | 14 | 11 |
| 21 | 54.440 | Alive | . | . | 14 | 10 |
| 22 | 54.540 | Alive | . | . | 14 | 9 |
| 23 | 55.530 | Alive | . | . | 14 | 8 |
| 24 | 56.510 | Alive | . | . | 14 | 7 |
| 25 | 57.930 | Alive | . | . | 14 | 6 |
| 26 | 60.530 | Alive | . | . | 14 | 5 |
| 27 | 65.560 | Alive | . | . | 14 | 4 |
| 28 | 66.280 | Alive | . | . | 14 | 3 |
| 29 | 74.110 | Alive | . | . | 14 | 2 |
| 30 | 75.720 | Alive | . | . | 14 | 1 |
| 31 | 81.090 | Alive | . | . | 14 | 0 |

| **Overall Comparisons** | | | |
| --- | --- | --- | --- |
|  | Chi-Square | df | P-value |
| Log Rank (Mantel-Cox) | 4.642 | 2 | **.098** |
| TLC.gps. | | | |


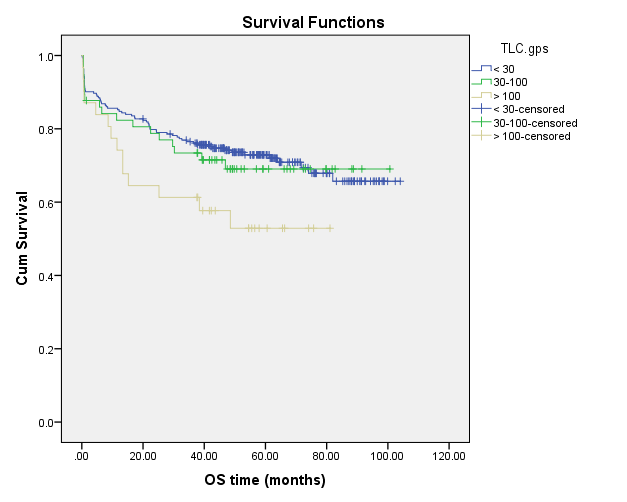


**Kaplan-Meier**

| **Case Processing Summary** | | | | |
| --- | --- | --- | --- | --- |
| TLC.gps1 | Total N | N of Events | Censored | |
| N | Percent |
| =< 100 | **300** | **86** | 214 | 71.3% |
| > 100 | **31** | **14** | 17 | 54.8% |
| Overall | 331 | 100 | 231 | 69.8% |

| **Survival Table** | | | | | | | |
| --- | --- | --- | --- | --- | --- | --- | --- |
| TLC.gps1 | | Time | Status | Cumulative Proportion Surviving at the Time | | N of Cumulative Events | N of Remaining Cases |
| Estimate | Std. Error |
| =< 100 | 1 | .100 | Died | .997 | .003 | 1 | 299 |
| 2 | .390 | Died | .993 | .005 | 2 | 298 |
| 3 | .460 | Died | . | . | 3 | 297 |
| 4 | .460 | Died | .987 | .007 | 4 | 296 |
| 5 | .490 | Died | . | . | 5 | 295 |
| 6 | .490 | Died | .980 | .008 | 6 | 294 |
| 7 | .530 | Died | .977 | .009 | 7 | 293 |
| 8 | .560 | Died | . | . | 8 | 292 |
| 9 | .560 | Died | . | . | 9 | 291 |
| 10 | .560 | Died | . | . | 10 | 290 |
| 11 | .560 | Died | .963 | .011 | 11 | 289 |
| 12 | .590 | Died | .960 | .011 | 12 | 288 |
| 13 | .630 | Died | . | . | 13 | 287 |
| 14 | .630 | Died | . | . | 14 | 286 |
| 15 | .630 | Died | . | . | 15 | 285 |
| 16 | .630 | Died | .947 | .013 | 16 | 284 |
| 17 | .690 | Died | .943 | .013 | 17 | 283 |
| 18 | .720 | Died | .940 | .014 | 18 | 282 |
| 19 | .760 | Died | . | . | 19 | 281 |
| 20 | .760 | Died | .933 | .014 | 20 | 280 |
| 21 | .790 | Died | . | . | 21 | 279 |
| 22 | .790 | Died | .927 | .015 | 22 | 278 |
| 23 | .820 | Died | .923 | .015 | 23 | 277 |
| 24 | .860 | Died | .920 | .016 | 24 | 276 |
| 25 | .890 | Died | . | . | 25 | 275 |
| 26 | .890 | Died | .913 | .016 | 26 | 274 |
| 27 | .920 | Died | .910 | .017 | 27 | 273 |
| 28 | .950 | Died | . | . | 28 | 272 |
| 29 | .950 | Died | .903 | .017 | 29 | 271 |
| 30 | 1.020 | Died | .900 | .017 | 30 | 270 |
| 31 | 1.120 | Died | .897 | .018 | 31 | 269 |
| 32 | 1.480 | Alive | . | . | 31 | 268 |
| 33 | 3.850 | Died | .893 | .018 | 32 | 267 |
| 34 | 4.740 | Died | .890 | .018 | 33 | 266 |
| 35 | 4.970 | Died | .887 | .018 | 34 | 265 |
| 36 | 5.390 | Died | .883 | .019 | 35 | 264 |
| 37 | 5.760 | Died | .880 | .019 | 36 | 263 |
| 38 | 5.890 | Died | .877 | .019 | 37 | 262 |
| 39 | 6.120 | Died | .873 | .019 | 38 | 261 |
| 40 | 6.250 | Died | .870 | .019 | 39 | 260 |
| 41 | 6.410 | Died | .867 | .020 | 40 | 259 |
| 42 | 6.510 | Died | .863 | .020 | 41 | 258 |
| 43 | 7.660 | Died | .860 | .020 | 42 | 257 |
| 44 | 7.990 | Died | .857 | .020 | 43 | 256 |
| 45 | 8.420 | Died | .853 | .020 | 44 | 255 |
| 46 | 11.380 | Died | .850 | .021 | 45 | 254 |
| 47 | 11.680 | Died | .846 | .021 | 46 | 253 |
| 48 | 12.200 | Died | .843 | .021 | 47 | 252 |
| 49 | 13.060 | Died | .840 | .021 | 48 | 251 |
| 50 | 14.310 | Died | .836 | .021 | 49 | 250 |
| 51 | 16.280 | Died | .833 | .022 | 50 | 249 |
| 52 | 16.680 | Died | .830 | .022 | 51 | 248 |
| 53 | 17.240 | Died | .826 | .022 | 52 | 247 |
| 54 | 17.340 | Died | .823 | .022 | 53 | 246 |
| 55 | 19.970 | Alive | . | . | 53 | 245 |
| 56 | 20.000 | Died | .820 | .022 | 54 | 244 |
| 57 | 21.090 | Died | .816 | .022 | 55 | 243 |
| 58 | 21.680 | Died | .813 | .023 | 56 | 242 |
| 59 | 21.910 | Died | .810 | .023 | 57 | 241 |
| 60 | 21.970 | Died | .806 | .023 | 58 | 240 |
| 61 | 22.240 | Died | .803 | .023 | 59 | 239 |
| 62 | 22.300 | Died | .800 | .023 | 60 | 238 |
| 63 | 22.470 | Died | .796 | .023 | 61 | 237 |
| 64 | 24.310 | Died | .793 | .023 | 62 | 236 |
| 65 | 24.410 | Died | .789 | .024 | 63 | 235 |
| 66 | 25.300 | Died | .786 | .024 | 64 | 234 |
| 67 | 27.830 | Died | .783 | .024 | 65 | 233 |
| 68 | 28.850 | Alive | . | . | 65 | 232 |
| 69 | 29.570 | Died | .779 | .024 | 66 | 231 |
| 70 | 29.670 | Died | .776 | .024 | 67 | 230 |
| 71 | 30.230 | Died | .773 | .024 | 68 | 229 |
| 72 | 31.150 | Died | .769 | .024 | 69 | 228 |
| 73 | 31.840 | Died | .766 | .024 | 70 | 227 |
| 74 | 32.700 | Died | .763 | .025 | 71 | 226 |
| 75 | 34.140 | Alive | . | . | 71 | 225 |
| 76 | 34.280 | Died | .759 | .025 | 72 | 224 |
| 77 | 35.390 | Alive | . | . | 72 | 223 |
| 78 | 36.450 | Died | .756 | .025 | 73 | 222 |
| 79 | 37.010 | Alive | . | . | 73 | 221 |
| 80 | 37.600 | Alive | . | . | 73 | 220 |
| 81 | 37.630 | Alive | . | . | 73 | 219 |
| 82 | 37.660 | Died | .752 | .025 | 74 | 218 |
| 83 | 37.660 | Alive | . | . | 74 | 217 |
| 84 | 37.760 | Alive | . | . | 74 | 216 |
| 85 | 37.830 | Alive | . | . | 74 | 215 |
| 86 | 38.390 | Alive | . | . | 74 | 214 |
| 87 | 38.750 | Alive | . | . | 74 | 213 |
| 88 | 39.050 | Alive | . | . | 74 | 212 |
| 89 | 39.210 | Died | .749 | .025 | 75 | 211 |
| 90 | 39.210 | Alive | . | . | 75 | 210 |
| 91 | 39.210 | Alive | . | . | 75 | 209 |
| 92 | 39.240 | Alive | . | . | 75 | 208 |
| 93 | 39.340 | Alive | . | . | 75 | 207 |
| 94 | 39.570 | Alive | . | . | 75 | 206 |
| 95 | 39.570 | Alive | . | . | 75 | 205 |
| 96 | 39.700 | Alive | . | . | 75 | 204 |
| 97 | 39.740 | Alive | . | . | 75 | 203 |
| 98 | 39.800 | Alive | . | . | 75 | 202 |
| 99 | 39.970 | Alive | . | . | 75 | 201 |
| 100 | 40.200 | Alive | . | . | 75 | 200 |
| 101 | 40.430 | Alive | . | . | 75 | 199 |
| 102 | 40.490 | Alive | . | . | 75 | 198 |
| 103 | 40.590 | Alive | . | . | 75 | 197 |
| 104 | 40.660 | Alive | . | . | 75 | 196 |
| 105 | 41.380 | Alive | . | . | 75 | 195 |
| 106 | 41.680 | Alive | . | . | 75 | 194 |
| 107 | 41.710 | Alive | . | . | 75 | 193 |
| 108 | 41.740 | Alive | . | . | 75 | 192 |
| 109 | 41.970 | Died | .745 | .025 | 76 | 191 |
| 110 | 41.970 | Alive | . | . | 76 | 190 |
| 111 | 42.430 | Alive | . | . | 76 | 189 |
| 112 | 42.500 | Alive | . | . | 76 | 188 |
| 113 | 42.700 | Died | .741 | .025 | 77 | 187 |
| 114 | 42.760 | Alive | . | . | 77 | 186 |
| 115 | 43.130 | Alive | . | . | 77 | 185 |
| 116 | 43.390 | Alive | . | . | 77 | 184 |
| 117 | 43.420 | Alive | . | . | 77 | 183 |
| 118 | 43.490 | Alive | . | . | 77 | 182 |
| 119 | 43.650 | Alive | . | . | 77 | 181 |
| 120 | 43.980 | Alive | . | . | 77 | 180 |
| 121 | 44.080 | Alive | . | . | 77 | 179 |
| 122 | 44.740 | Alive | . | . | 77 | 178 |
| 123 | 45.230 | Alive | . | . | 77 | 177 |
| 124 | 45.430 | Alive | . | . | 77 | 176 |
| 125 | 45.590 | Alive | . | . | 77 | 175 |
| 126 | 45.790 | Alive | . | . | 77 | 174 |
| 127 | 46.050 | Alive | . | . | 77 | 173 |
| 128 | 46.120 | Alive | . | . | 77 | 172 |
| 129 | 46.180 | Alive | . | . | 77 | 171 |
| 130 | 46.280 | Alive | . | . | 77 | 170 |
| 131 | 46.280 | Alive | . | . | 77 | 169 |
| 132 | 46.580 | Alive | . | . | 77 | 168 |
| 133 | 46.740 | Died | .736 | .026 | 78 | 167 |
| 134 | 46.780 | Alive | . | . | 78 | 166 |
| 135 | 46.910 | Died | .732 | .026 | 79 | 165 |
| 136 | 47.170 | Alive | . | . | 79 | 164 |
| 137 | 47.270 | Alive | . | . | 79 | 163 |
| 138 | 47.300 | Alive | . | . | 79 | 162 |
| 139 | 47.300 | Alive | . | . | 79 | 161 |
| 140 | 47.500 | Alive | . | . | 79 | 160 |
| 141 | 47.760 | Alive | . | . | 79 | 159 |
| 142 | 47.830 | Alive | . | . | 79 | 158 |
| 143 | 48.030 | Alive | . | . | 79 | 157 |
| 144 | 48.190 | Alive | . | . | 79 | 156 |
| 145 | 48.450 | Alive | . | . | 79 | 155 |
| 146 | 48.650 | Alive | . | . | 79 | 154 |
| 147 | 49.010 | Died | .727 | .026 | 80 | 153 |
| 148 | 49.180 | Alive | . | . | 80 | 152 |
| 149 | 49.240 | Alive | . | . | 80 | 151 |
| 150 | 49.280 | Alive | . | . | 80 | 150 |
| 151 | 49.310 | Alive | . | . | 80 | 149 |
| 152 | 49.410 | Alive | . | . | 80 | 148 |
| 153 | 49.670 | Alive | . | . | 80 | 147 |
| 154 | 49.800 | Alive | . | . | 80 | 146 |
| 155 | 49.840 | Alive | . | . | 80 | 145 |
| 156 | 49.930 | Alive | . | . | 80 | 144 |
| 157 | 50.000 | Alive | . | . | 80 | 143 |
| 158 | 50.260 | Alive | . | . | 80 | 142 |
| 159 | 50.430 | Alive | . | . | 80 | 141 |
| 160 | 50.630 | Alive | . | . | 80 | 140 |
| 161 | 50.720 | Alive | . | . | 80 | 139 |
| 162 | 51.220 | Alive | . | . | 80 | 138 |
| 163 | 51.280 | Alive | . | . | 80 | 137 |
| 164 | 51.320 | Alive | . | . | 80 | 136 |
| 165 | 51.410 | Alive | . | . | 80 | 135 |
| 166 | 51.880 | Alive | . | . | 80 | 134 |
| 167 | 52.040 | Alive | . | . | 80 | 133 |
| 168 | 52.270 | Alive | . | . | 80 | 132 |
| 169 | 52.300 | Alive | . | . | 80 | 131 |
| 170 | 52.430 | Alive | . | . | 80 | 130 |
| 171 | 52.570 | Alive | . | . | 80 | 129 |
| 172 | 52.990 | Alive | . | . | 80 | 128 |
| 173 | 53.060 | Died | **.722** | .027 | 81 | 127 |
| 174 | 53.090 | Alive | . | . | 81 | 126 |
| 175 | 53.320 | Alive | . | . | 81 | 125 |
| 176 | 54.930 | Alive | . | . | 81 | 124 |
| 177 | 55.100 | Alive | . | . | 81 | 123 |
| 178 | 55.130 | Alive | . | . | 81 | 122 |
| 179 | 55.200 | Alive | . | . | 81 | 121 |
| 180 | 55.920 | Alive | . | . | 81 | 120 |
| 181 | 55.920 | Alive | . | . | 81 | 119 |
| 182 | 55.990 | Alive | . | . | 81 | 118 |
| 183 | 56.020 | Alive | . | . | 81 | 117 |
| 184 | 56.280 | Alive | . | . | 81 | 116 |
| 185 | 57.040 | Alive | . | . | 81 | 115 |
| 186 | 57.070 | Alive | . | . | 81 | 114 |
| 187 | 57.270 | Alive | . | . | 81 | 113 |
| 188 | 57.430 | Alive | . | . | 81 | 112 |
| 189 | 57.700 | Alive | . | . | 81 | 111 |
| 190 | 57.800 | Alive | . | . | 81 | 110 |
| 191 | 58.060 | Alive | . | . | 81 | 109 |
| 192 | 58.260 | Alive | . | . | 81 | 108 |
| 193 | 58.290 | Alive | . | . | 81 | 107 |
| 194 | 58.590 | Alive | . | . | 81 | 106 |
| 195 | 59.050 | Alive | . | . | 81 | 105 |
| 196 | 59.110 | Alive | . | . | 81 | 104 |
| 197 | 59.140 | Alive | . | . | 81 | 103 |
| 198 | 59.240 | Alive | . | . | 81 | 102 |
| 199 | 59.240 | Alive | . | . | 81 | 101 |
| 200 | 59.410 | Alive | . | . | 81 | 100 |
| 201 | 59.510 | Alive | . | . | 81 | 99 |
| 202 | 60.200 | Alive | . | . | 81 | 98 |
| 203 | 60.360 | Alive | . | . | 81 | 97 |
| 204 | 60.790 | Alive | . | . | 81 | 96 |
| 205 | 61.020 | Alive | . | . | 81 | 95 |
| 206 | 61.220 | Alive | . | . | 81 | 94 |
| 207 | 61.250 | Died | .714 | .027 | 82 | 93 |
| 208 | 61.510 | Alive | . | . | 82 | 92 |
| 209 | 61.840 | Alive | . | . | 82 | 91 |
| 210 | 61.840 | Alive | . | . | 82 | 90 |
| 211 | 61.840 | Alive | . | . | 82 | 89 |
| 212 | 62.140 | Alive | . | . | 82 | 88 |
| 213 | 62.140 | Alive | . | . | 82 | 87 |
| 214 | 62.400 | Alive | . | . | 82 | 86 |
| 215 | 62.800 | Alive | . | . | 82 | 85 |
| 216 | 62.800 | Alive | . | . | 82 | 84 |
| 217 | 63.060 | Alive | . | . | 82 | 83 |
| 218 | 63.320 | Alive | . | . | 82 | 82 |
| 219 | 63.590 | Alive | . | . | 82 | 81 |
| 220 | 63.850 | Alive | . | . | 82 | 80 |
| 221 | 63.910 | Died | .705 | .028 | 83 | 79 |
| 222 | 64.510 | Alive | . | . | 83 | 78 |
| 223 | 64.640 | Alive | . | . | 83 | 77 |
| 224 | 64.800 | Alive | . | . | 83 | 76 |
| 225 | 64.900 | Alive | . | . | 83 | 75 |
| 226 | 65.330 | Alive | . | . | 83 | 74 |
| 227 | 66.090 | Alive | . | . | 83 | 73 |
| 228 | 67.040 | Alive | . | . | 83 | 72 |
| 229 | 67.340 | Alive | . | . | 83 | 71 |
| 230 | 67.830 | Alive | . | . | 83 | 70 |
| 231 | 68.090 | Alive | . | . | 83 | 69 |
| 232 | 68.850 | Alive | . | . | 83 | 68 |
| 233 | 68.850 | Alive | . | . | 83 | 67 |
| 234 | 69.240 | Alive | . | . | 83 | 66 |
| 235 | 69.570 | Alive | . | . | 83 | 65 |
| 236 | 69.700 | Alive | . | . | 83 | 64 |
| 237 | 70.390 | Alive | . | . | 83 | 63 |
| 238 | 70.590 | Alive | . | . | 83 | 62 |
| 239 | 71.320 | Alive | . | . | 83 | 61 |
| 240 | 71.380 | Alive | . | . | 83 | 60 |
| 241 | 71.710 | Died | .693 | .030 | 84 | 59 |
| 242 | 72.340 | Alive | . | . | 84 | 58 |
| 243 | 72.370 | Alive | . | . | 84 | 57 |
| 244 | 73.030 | Alive | . | . | 84 | 56 |
| 245 | 73.060 | Alive | . | . | 84 | 55 |
| 246 | 73.910 | Alive | . | . | 84 | 54 |
| 247 | 74.080 | Died | .680 | .032 | 85 | 53 |
| 248 | 74.640 | Alive | . | . | 85 | 52 |
| 249 | 75.160 | Alive | . | . | 85 | 51 |
| 250 | 75.820 | Alive | . | . | 85 | 50 |
| 251 | 75.920 | Alive | . | . | 85 | 49 |
| 252 | 76.150 | Alive | . | . | 85 | 48 |
| 253 | 76.250 | Alive | . | . | 85 | 47 |
| 254 | 76.450 | Alive | . | . | 85 | 46 |
| 255 | 76.640 | Alive | . | . | 85 | 45 |
| 256 | 78.850 | Alive | . | . | 85 | 44 |
| 257 | 79.800 | Alive | . | . | 85 | 43 |
| 258 | 79.840 | Alive | . | . | 85 | 42 |
| 259 | 79.870 | Alive | . | . | 85 | 41 |
| 260 | 80.000 | Alive | . | . | 85 | 40 |
| 261 | 80.100 | Alive | . | . | 85 | 39 |
| 262 | 80.890 | Alive | . | . | 85 | 38 |
| 263 | 80.950 | Alive | . | . | 85 | 37 |
| 264 | 81.780 | Alive | . | . | 85 | 36 |
| 265 | 81.970 | Died | .661 | .037 | 86 | 35 |
| 266 | 82.760 | Alive | . | . | 86 | 34 |
| 267 | 83.160 | Alive | . | . | 86 | 33 |
| 268 | 85.260 | Alive | . | . | 86 | 32 |
| 269 | 85.890 | Alive | . | . | 86 | 31 |
| 270 | 86.640 | Alive | . | . | 86 | 30 |
| 271 | 87.200 | Alive | . | . | 86 | 29 |
| 272 | 87.630 | Alive | . | . | 86 | 28 |
| 273 | 88.130 | Alive | . | . | 86 | 27 |
| 274 | 88.190 | Alive | . | . | 86 | 26 |
| 275 | 88.220 | Alive | . | . | 86 | 25 |
| 276 | 88.720 | Alive | . | . | 86 | 24 |
| 277 | 88.720 | Alive | . | . | 86 | 23 |
| 278 | 89.050 | Alive | . | . | 86 | 22 |
| 279 | 89.080 | Alive | . | . | 86 | 21 |
| 280 | 90.000 | Alive | . | . | 86 | 20 |
| 281 | 90.820 | Alive | . | . | 86 | 19 |
| 282 | 91.220 | Alive | . | . | 86 | 18 |
| 283 | 91.380 | Alive | . | . | 86 | 17 |
| 284 | 91.510 | Alive | . | . | 86 | 16 |
| 285 | 92.430 | Alive | . | . | 86 | 15 |
| 286 | 92.730 | Alive | . | . | 86 | 14 |
| 287 | 94.340 | Alive | . | . | 86 | 13 |
| 288 | 95.230 | Alive | . | . | 86 | 12 |
| 289 | 95.720 | Alive | . | . | 86 | 11 |
| 290 | 96.250 | Alive | . | . | 86 | 10 |
| 291 | 97.040 | Alive | . | . | 86 | 9 |
| 292 | 97.140 | Alive | . | . | 86 | 8 |
| 293 | 97.170 | Alive | . | . | 86 | 7 |
| 294 | 98.130 | Alive | . | . | 86 | 6 |
| 295 | 98.590 | Alive | . | . | 86 | 5 |
| 296 | 98.820 | Alive | . | . | 86 | 4 |
| 297 | 99.900 | Alive | . | . | 86 | 3 |
| 298 | 100.660 | Alive | . | . | 86 | 2 |
| 299 | 102.400 | Alive | . | . | 86 | 1 |
| 300 | 104.050 | Alive | . | . | 86 | 0 |
| > 100 | 1 | .330 | Died | .968 | .032 | 1 | 30 |
| 2 | .460 | Died | .935 | .044 | 2 | 29 |
| 3 | .630 | Died | .903 | .053 | 3 | 28 |
| 4 | .720 | Died | .871 | .060 | 4 | 27 |
| 5 | 4.570 | Died | .839 | .066 | 5 | 26 |
| 6 | 8.590 | Died | .806 | .071 | 6 | 25 |
| 7 | 9.540 | Died | .774 | .075 | 7 | 24 |
| 8 | 11.510 | Died | .742 | .079 | 8 | 23 |
| 9 | 13.390 | Died | . | . | 9 | 22 |
| 10 | 13.390 | Died | .677 | .084 | 10 | 21 |
| 11 | 15.230 | Died | .645 | .086 | 11 | 20 |
| 12 | 25.200 | Died | .613 | .087 | 12 | 19 |
| 13 | 37.600 | Alive | . | . | 12 | 18 |
| 14 | 37.860 | Alive | . | . | 12 | 17 |
| 15 | 38.390 | Died | .577 | .089 | 13 | 16 |
| 16 | 39.510 | Alive | . | . | 13 | 15 |
| 17 | 41.680 | Alive | . | . | 13 | 14 |
| 18 | 42.270 | Alive | . | . | 13 | 13 |
| 19 | 43.590 | Alive | . | . | 13 | 12 |
| 20 | 48.550 | Died | **.529** | .094 | 14 | 11 |
| 21 | 54.440 | Alive | . | . | 14 | 10 |
| 22 | 54.540 | Alive | . | . | 14 | 9 |
| 23 | 55.530 | Alive | . | . | 14 | 8 |
| 24 | 56.510 | Alive | . | . | 14 | 7 |
| 25 | 57.930 | Alive | . | . | 14 | 6 |
| 26 | 60.530 | Alive | . | . | 14 | 5 |
| 27 | 65.560 | Alive | . | . | 14 | 4 |
| 28 | 66.280 | Alive | . | . | 14 | 3 |
| 29 | 74.110 | Alive | . | . | 14 | 2 |
| 30 | 75.720 | Alive | . | . | 14 | 1 |
| 31 | 81.090 | Alive | . | . | 14 | 0 |

| **Overall Comparisons** | | | |
| --- | --- | --- | --- |
|  | Chi-Square | df | P-value |
| Log Rank (Mantel-Cox) | 4.537 | 1 | **.033** |
| TLC.gps1. | | | |


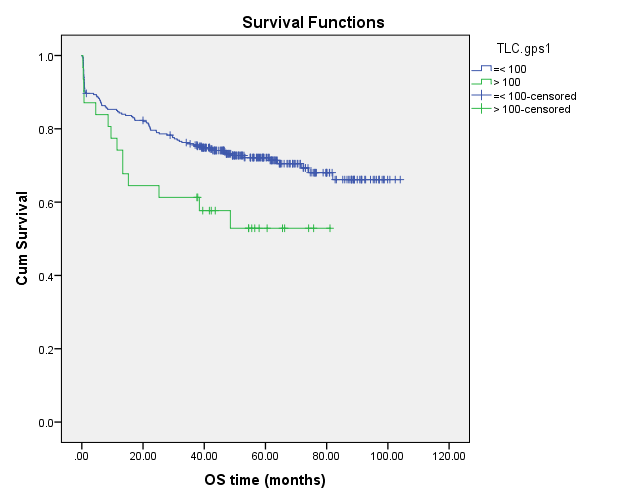


**Kaplan-Meier**

| **Case Processing Summary** | | | | |
| --- | --- | --- | --- | --- |
| Plat.gps | Total N | N of Events | Censored | |
| N | Percent |
| >=100 | **42** | **9** | 33 | 78.6% |
| < 100 | **289** | **91** | 198 | 68.5% |
| Overall | 331 | 100 | 231 | 69.8% |

| **Survival Table** | | | | | | | |
| --- | --- | --- | --- | --- | --- | --- | --- |
| Plat.gps | | Time | Status | Cumulative Proportion Surviving at the Time | | N of Cumulative Events | N of Remaining Cases |
| Estimate | Std. Error |
| >=100 | 1 | .630 | Died | .976 | .024 | 1 | 41 |
| 2 | 4.570 | Died | .952 | .033 | 2 | 40 |
| 3 | 6.250 | Died | .929 | .040 | 3 | 39 |
| 4 | 20.000 | Died | .905 | .045 | 4 | 38 |
| 5 | 21.970 | Died | .881 | .050 | 5 | 37 |
| 6 | 22.300 | Died | .857 | .054 | 6 | 36 |
| 7 | 24.310 | Died | .833 | .058 | 7 | 35 |
| 8 | 27.830 | Died | .810 | .061 | 8 | 34 |
| 9 | 34.140 | Alive | . | . | 8 | 33 |
| 10 | 36.450 | Died | **.785** | .064 | 9 | 32 |
| 11 | 37.010 | Alive | . | . | 9 | 31 |
| 12 | 38.750 | Alive | . | . | 9 | 30 |
| 13 | 39.970 | Alive | . | . | 9 | 29 |
| 14 | 40.490 | Alive | . | . | 9 | 28 |
| 15 | 43.390 | Alive | . | . | 9 | 27 |
| 16 | 43.650 | Alive | . | . | 9 | 26 |
| 17 | 44.080 | Alive | . | . | 9 | 25 |
| 18 | 45.590 | Alive | . | . | 9 | 24 |
| 19 | 46.580 | Alive | . | . | 9 | 23 |
| 20 | 49.240 | Alive | . | . | 9 | 22 |
| 21 | 51.280 | Alive | . | . | 9 | 21 |
| 22 | 53.090 | Alive | . | . | 9 | 20 |
| 23 | 54.440 | Alive | . | . | 9 | 19 |
| 24 | 54.930 | Alive | . | . | 9 | 18 |
| 25 | 55.100 | Alive | . | . | 9 | 17 |
| 26 | 55.920 | Alive | . | . | 9 | 16 |
| 27 | 57.800 | Alive | . | . | 9 | 15 |
| 28 | 58.590 | Alive | . | . | 9 | 14 |
| 29 | 59.140 | Alive | . | . | 9 | 13 |
| 30 | 59.240 | Alive | . | . | 9 | 12 |
| 31 | 63.590 | Alive | . | . | 9 | 11 |
| 32 | 64.900 | Alive | . | . | 9 | 10 |
| 33 | 66.090 | Alive | . | . | 9 | 9 |
| 34 | 67.040 | Alive | . | . | 9 | 8 |
| 35 | 68.090 | Alive | . | . | 9 | 7 |
| 36 | 76.640 | Alive | . | . | 9 | 6 |
| 37 | 78.850 | Alive | . | . | 9 | 5 |
| 38 | 83.160 | Alive | . | . | 9 | 4 |
| 39 | 85.890 | Alive | . | . | 9 | 3 |
| 40 | 88.190 | Alive | . | . | 9 | 2 |
| 41 | 90.000 | Alive | . | . | 9 | 1 |
| 42 | 95.230 | Alive | . | . | 9 | 0 |
| < 100 | 1 | .100 | Died | .997 | .003 | 1 | 288 |
| 2 | .330 | Died | .993 | .005 | 2 | 287 |
| 3 | .390 | Died | .990 | .006 | 3 | 286 |
| 4 | .460 | Died | . | . | 4 | 285 |
| 5 | .460 | Died | . | . | 5 | 284 |
| 6 | .460 | Died | .979 | .008 | 6 | 283 |
| 7 | .490 | Died | . | . | 7 | 282 |
| 8 | .490 | Died | .972 | .010 | 8 | 281 |
| 9 | .530 | Died | .969 | .010 | 9 | 280 |
| 10 | .560 | Died | . | . | 10 | 279 |
| 11 | .560 | Died | . | . | 11 | 278 |
| 12 | .560 | Died | . | . | 12 | 277 |
| 13 | .560 | Died | .955 | .012 | 13 | 276 |
| 14 | .590 | Died | .952 | .013 | 14 | 275 |
| 15 | .630 | Died | . | . | 15 | 274 |
| 16 | .630 | Died | . | . | 16 | 273 |
| 17 | .630 | Died | . | . | 17 | 272 |
| 18 | .630 | Died | .938 | .014 | 18 | 271 |
| 19 | .690 | Died | .934 | .015 | 19 | 270 |
| 20 | .720 | Died | . | . | 20 | 269 |
| 21 | .720 | Died | .927 | .015 | 21 | 268 |
| 22 | .760 | Died | . | . | 22 | 267 |
| 23 | .760 | Died | .920 | .016 | 23 | 266 |
| 24 | .790 | Died | . | . | 24 | 265 |
| 25 | .790 | Died | .913 | .017 | 25 | 264 |
| 26 | .820 | Died | .910 | .017 | 26 | 263 |
| 27 | .860 | Died | .907 | .017 | 27 | 262 |
| 28 | .890 | Died | . | . | 28 | 261 |
| 29 | .890 | Died | .900 | .018 | 29 | 260 |
| 30 | .920 | Died | .896 | .018 | 30 | 259 |
| 31 | .950 | Died | . | . | 31 | 258 |
| 32 | .950 | Died | .889 | .018 | 32 | 257 |
| 33 | 1.020 | Died | .886 | .019 | 33 | 256 |
| 34 | 1.120 | Died | .882 | .019 | 34 | 255 |
| 35 | 1.480 | Alive | . | . | 34 | 254 |
| 36 | 3.850 | Died | .879 | .019 | 35 | 253 |
| 37 | 4.740 | Died | .875 | .019 | 36 | 252 |
| 38 | 4.970 | Died | .872 | .020 | 37 | 251 |
| 39 | 5.390 | Died | .868 | .020 | 38 | 250 |
| 40 | 5.760 | Died | .865 | .020 | 39 | 249 |
| 41 | 5.890 | Died | .862 | .020 | 40 | 248 |
| 42 | 6.120 | Died | .858 | .021 | 41 | 247 |
| 43 | 6.410 | Died | .855 | .021 | 42 | 246 |
| 44 | 6.510 | Died | .851 | .021 | 43 | 245 |
| 45 | 7.660 | Died | .848 | .021 | 44 | 244 |
| 46 | 7.990 | Died | .844 | .021 | 45 | 243 |
| 47 | 8.420 | Died | .841 | .022 | 46 | 242 |
| 48 | 8.590 | Died | .837 | .022 | 47 | 241 |
| 49 | 9.540 | Died | .834 | .022 | 48 | 240 |
| 50 | 11.380 | Died | .830 | .022 | 49 | 239 |
| 51 | 11.510 | Died | .827 | .022 | 50 | 238 |
| 52 | 11.680 | Died | .823 | .022 | 51 | 237 |
| 53 | 12.200 | Died | .820 | .023 | 52 | 236 |
| 54 | 13.060 | Died | .816 | .023 | 53 | 235 |
| 55 | 13.390 | Died | . | . | 54 | 234 |
| 56 | 13.390 | Died | .809 | .023 | 55 | 233 |
| 57 | 14.310 | Died | .806 | .023 | 56 | 232 |
| 58 | 15.230 | Died | .802 | .023 | 57 | 231 |
| 59 | 16.280 | Died | .799 | .024 | 58 | 230 |
| 60 | 16.680 | Died | .796 | .024 | 59 | 229 |
| 61 | 17.240 | Died | .792 | .024 | 60 | 228 |
| 62 | 17.340 | Died | .789 | .024 | 61 | 227 |
| 63 | 19.970 | Alive | . | . | 61 | 226 |
| 64 | 21.090 | Died | .785 | .024 | 62 | 225 |
| 65 | 21.680 | Died | .782 | .024 | 63 | 224 |
| 66 | 21.910 | Died | .778 | .024 | 64 | 223 |
| 67 | 22.240 | Died | .775 | .025 | 65 | 222 |
| 68 | 22.470 | Died | .771 | .025 | 66 | 221 |
| 69 | 24.410 | Died | .768 | .025 | 67 | 220 |
| 70 | 25.200 | Died | .764 | .025 | 68 | 219 |
| 71 | 25.300 | Died | .761 | .025 | 69 | 218 |
| 72 | 28.850 | Alive | . | . | 69 | 217 |
| 73 | 29.570 | Died | .757 | .025 | 70 | 216 |
| 74 | 29.670 | Died | .754 | .025 | 71 | 215 |
| 75 | 30.230 | Died | .750 | .026 | 72 | 214 |
| 76 | 31.150 | Died | .747 | .026 | 73 | 213 |
| 77 | 31.840 | Died | .743 | .026 | 74 | 212 |
| 78 | 32.700 | Died | .740 | .026 | 75 | 211 |
| 79 | 34.280 | Died | .736 | .026 | 76 | 210 |
| 80 | 35.390 | Alive | . | . | 76 | 209 |
| 81 | 37.600 | Alive | . | . | 76 | 208 |
| 82 | 37.600 | Alive | . | . | 76 | 207 |
| 83 | 37.630 | Alive | . | . | 76 | 206 |
| 84 | 37.660 | Died | .733 | .026 | 77 | 205 |
| 85 | 37.660 | Alive | . | . | 77 | 204 |
| 86 | 37.760 | Alive | . | . | 77 | 203 |
| 87 | 37.830 | Alive | . | . | 77 | 202 |
| 88 | 37.860 | Alive | . | . | 77 | 201 |
| 89 | 38.390 | Died | .729 | .026 | 78 | 200 |
| 90 | 38.390 | Alive | . | . | 78 | 199 |
| 91 | 39.050 | Alive | . | . | 78 | 198 |
| 92 | 39.210 | Died | .725 | .026 | 79 | 197 |
| 93 | 39.210 | Alive | . | . | 79 | 196 |
| 94 | 39.210 | Alive | . | . | 79 | 195 |
| 95 | 39.240 | Alive | . | . | 79 | 194 |
| 96 | 39.340 | Alive | . | . | 79 | 193 |
| 97 | 39.510 | Alive | . | . | 79 | 192 |
| 98 | 39.570 | Alive | . | . | 79 | 191 |
| 99 | 39.570 | Alive | . | . | 79 | 190 |
| 100 | 39.700 | Alive | . | . | 79 | 189 |
| 101 | 39.740 | Alive | . | . | 79 | 188 |
| 102 | 39.800 | Alive | . | . | 79 | 187 |
| 103 | 40.200 | Alive | . | . | 79 | 186 |
| 104 | 40.430 | Alive | . | . | 79 | 185 |
| 105 | 40.590 | Alive | . | . | 79 | 184 |
| 106 | 40.660 | Alive | . | . | 79 | 183 |
| 107 | 41.380 | Alive | . | . | 79 | 182 |
| 108 | 41.680 | Alive | . | . | 79 | 181 |
| 109 | 41.680 | Alive | . | . | 79 | 180 |
| 110 | 41.710 | Alive | . | . | 79 | 179 |
| 111 | 41.740 | Alive | . | . | 79 | 178 |
| 112 | 41.970 | Died | .721 | .027 | 80 | 177 |
| 113 | 41.970 | Alive | . | . | 80 | 176 |
| 114 | 42.270 | Alive | . | . | 80 | 175 |
| 115 | 42.430 | Alive | . | . | 80 | 174 |
| 116 | 42.500 | Alive | . | . | 80 | 173 |
| 117 | 42.700 | Died | .717 | .027 | 81 | 172 |
| 118 | 42.760 | Alive | . | . | 81 | 171 |
| 119 | 43.130 | Alive | . | . | 81 | 170 |
| 120 | 43.420 | Alive | . | . | 81 | 169 |
| 121 | 43.490 | Alive | . | . | 81 | 168 |
| 122 | 43.590 | Alive | . | . | 81 | 167 |
| 123 | 43.980 | Alive | . | . | 81 | 166 |
| 124 | 44.740 | Alive | . | . | 81 | 165 |
| 125 | 45.230 | Alive | . | . | 81 | 164 |
| 126 | 45.430 | Alive | . | . | 81 | 163 |
| 127 | 45.790 | Alive | . | . | 81 | 162 |
| 128 | 46.050 | Alive | . | . | 81 | 161 |
| 129 | 46.120 | Alive | . | . | 81 | 160 |
| 130 | 46.180 | Alive | . | . | 81 | 159 |
| 131 | 46.280 | Alive | . | . | 81 | 158 |
| 132 | 46.280 | Alive | . | . | 81 | 157 |
| 133 | 46.740 | Died | .712 | .027 | 82 | 156 |
| 134 | 46.780 | Alive | . | . | 82 | 155 |
| 135 | 46.910 | Died | .708 | .027 | 83 | 154 |
| 136 | 47.170 | Alive | . | . | 83 | 153 |
| 137 | 47.270 | Alive | . | . | 83 | 152 |
| 138 | 47.300 | Alive | . | . | 83 | 151 |
| 139 | 47.300 | Alive | . | . | 83 | 150 |
| 140 | 47.500 | Alive | . | . | 83 | 149 |
| 141 | 47.760 | Alive | . | . | 83 | 148 |
| 142 | 47.830 | Alive | . | . | 83 | 147 |
| 143 | 48.030 | Alive | . | . | 83 | 146 |
| 144 | 48.190 | Alive | . | . | 83 | 145 |
| 145 | 48.450 | Alive | . | . | 83 | 144 |
| 146 | 48.550 | Died | .703 | .027 | 84 | 143 |
| 147 | 48.650 | Alive | . | . | 84 | 142 |
| 148 | 49.010 | Died | .698 | .028 | 85 | 141 |
| 149 | 49.180 | Alive | . | . | 85 | 140 |
| 150 | 49.280 | Alive | . | . | 85 | 139 |
| 151 | 49.310 | Alive | . | . | 85 | 138 |
| 152 | 49.410 | Alive | . | . | 85 | 137 |
| 153 | 49.670 | Alive | . | . | 85 | 136 |
| 154 | 49.800 | Alive | . | . | 85 | 135 |
| 155 | 49.840 | Alive | . | . | 85 | 134 |
| 156 | 49.930 | Alive | . | . | 85 | 133 |
| 157 | 50.000 | Alive | . | . | 85 | 132 |
| 158 | 50.260 | Alive | . | . | 85 | 131 |
| 159 | 50.430 | Alive | . | . | 85 | 130 |
| 160 | 50.630 | Alive | . | . | 85 | 129 |
| 161 | 50.720 | Alive | . | . | 85 | 128 |
| 162 | 51.220 | Alive | . | . | 85 | 127 |
| 163 | 51.320 | Alive | . | . | 85 | 126 |
| 164 | 51.410 | Alive | . | . | 85 | 125 |
| 165 | 51.880 | Alive | . | . | 85 | 124 |
| 166 | 52.040 | Alive | . | . | 85 | 123 |
| 167 | 52.270 | Alive | . | . | 85 | 122 |
| 168 | 52.300 | Alive | . | . | 85 | 121 |
| 169 | 52.430 | Alive | . | . | 85 | 120 |
| 170 | 52.570 | Alive | . | . | 85 | 119 |
| 171 | 52.990 | Alive | . | . | 85 | 118 |
| 172 | 53.060 | Died | .**692** | .028 | 86 | 117 |
| 173 | 53.320 | Alive | . | . | 86 | 116 |
| 174 | 54.540 | Alive | . | . | 86 | 115 |
| 175 | 55.130 | Alive | . | . | 86 | 114 |
| 176 | 55.200 | Alive | . | . | 86 | 113 |
| 177 | 55.530 | Alive | . | . | 86 | 112 |
| 178 | 55.920 | Alive | . | . | 86 | 111 |
| 179 | 55.990 | Alive | . | . | 86 | 110 |
| 180 | 56.020 | Alive | . | . | 86 | 109 |
| 181 | 56.280 | Alive | . | . | 86 | 108 |
| 182 | 56.510 | Alive | . | . | 86 | 107 |
| 183 | 57.040 | Alive | . | . | 86 | 106 |
| 184 | 57.070 | Alive | . | . | 86 | 105 |
| 185 | 57.270 | Alive | . | . | 86 | 104 |
| 186 | 57.430 | Alive | . | . | 86 | 103 |
| 187 | 57.700 | Alive | . | . | 86 | 102 |
| 188 | 57.930 | Alive | . | . | 86 | 101 |
| 189 | 58.060 | Alive | . | . | 86 | 100 |
| 190 | 58.260 | Alive | . | . | 86 | 99 |
| 191 | 58.290 | Alive | . | . | 86 | 98 |
| 192 | 59.050 | Alive | . | . | 86 | 97 |
| 193 | 59.110 | Alive | . | . | 86 | 96 |
| 194 | 59.240 | Alive | . | . | 86 | 95 |
| 195 | 59.410 | Alive | . | . | 86 | 94 |
| 196 | 59.510 | Alive | . | . | 86 | 93 |
| 197 | 60.200 | Alive | . | . | 86 | 92 |
| 198 | 60.360 | Alive | . | . | 86 | 91 |
| 199 | 60.530 | Alive | . | . | 86 | 90 |
| 200 | 60.790 | Alive | . | . | 86 | 89 |
| 201 | 61.020 | Alive | . | . | 86 | 88 |
| 202 | 61.220 | Alive | . | . | 86 | 87 |
| 203 | 61.250 | Died | .684 | .029 | 87 | 86 |
| 204 | 61.510 | Alive | . | . | 87 | 85 |
| 205 | 61.840 | Alive | . | . | 87 | 84 |
| 206 | 61.840 | Alive | . | . | 87 | 83 |
| 207 | 61.840 | Alive | . | . | 87 | 82 |
| 208 | 62.140 | Alive | . | . | 87 | 81 |
| 209 | 62.140 | Alive | . | . | 87 | 80 |
| 210 | 62.400 | Alive | . | . | 87 | 79 |
| 211 | 62.800 | Alive | . | . | 87 | 78 |
| 212 | 62.800 | Alive | . | . | 87 | 77 |
| 213 | 63.060 | Alive | . | . | 87 | 76 |
| 214 | 63.320 | Alive | . | . | 87 | 75 |
| 215 | 63.850 | Alive | . | . | 87 | 74 |
| 216 | 63.910 | Died | .675 | .030 | 88 | 73 |
| 217 | 64.510 | Alive | . | . | 88 | 72 |
| 218 | 64.640 | Alive | . | . | 88 | 71 |
| 219 | 64.800 | Alive | . | . | 88 | 70 |
| 220 | 65.330 | Alive | . | . | 88 | 69 |
| 221 | 65.560 | Alive | . | . | 88 | 68 |
| 222 | 66.280 | Alive | . | . | 88 | 67 |
| 223 | 67.340 | Alive | . | . | 88 | 66 |
| 224 | 67.830 | Alive | . | . | 88 | 65 |
| 225 | 68.850 | Alive | . | . | 88 | 64 |
| 226 | 68.850 | Alive | . | . | 88 | 63 |
| 227 | 69.240 | Alive | . | . | 88 | 62 |
| 228 | 69.570 | Alive | . | . | 88 | 61 |
| 229 | 69.700 | Alive | . | . | 88 | 60 |
| 230 | 70.390 | Alive | . | . | 88 | 59 |
| 231 | 70.590 | Alive | . | . | 88 | 58 |
| 232 | 71.320 | Alive | . | . | 88 | 57 |
| 233 | 71.380 | Alive | . | . | 88 | 56 |
| 234 | 71.710 | Died | .663 | .032 | 89 | 55 |
| 235 | 72.340 | Alive | . | . | 89 | 54 |
| 236 | 72.370 | Alive | . | . | 89 | 53 |
| 237 | 73.030 | Alive | . | . | 89 | 52 |
| 238 | 73.060 | Alive | . | . | 89 | 51 |
| 239 | 73.910 | Alive | . | . | 89 | 50 |
| 240 | 74.080 | Died | .650 | .034 | 90 | 49 |
| 241 | 74.110 | Alive | . | . | 90 | 48 |
| 242 | 74.640 | Alive | . | . | 90 | 47 |
| 243 | 75.160 | Alive | . | . | 90 | 46 |
| 244 | 75.720 | Alive | . | . | 90 | 45 |
| 245 | 75.820 | Alive | . | . | 90 | 44 |
| 246 | 75.920 | Alive | . | . | 90 | 43 |
| 247 | 76.150 | Alive | . | . | 90 | 42 |
| 248 | 76.250 | Alive | . | . | 90 | 41 |
| 249 | 76.450 | Alive | . | . | 90 | 40 |
| 250 | 79.800 | Alive | . | . | 90 | 39 |
| 251 | 79.840 | Alive | . | . | 90 | 38 |
| 252 | 79.870 | Alive | . | . | 90 | 37 |
| 253 | 80.000 | Alive | . | . | 90 | 36 |
| 254 | 80.100 | Alive | . | . | 90 | 35 |
| 255 | 80.890 | Alive | . | . | 90 | 34 |
| 256 | 80.950 | Alive | . | . | 90 | 33 |
| 257 | 81.090 | Alive | . | . | 90 | 32 |
| 258 | 81.780 | Alive | . | . | 90 | 31 |
| 259 | 81.970 | Died | .629 | .039 | 91 | 30 |
| 260 | 82.760 | Alive | . | . | 91 | 29 |
| 261 | 85.260 | Alive | . | . | 91 | 28 |
| 262 | 86.640 | Alive | . | . | 91 | 27 |
| 263 | 87.200 | Alive | . | . | 91 | 26 |
| 264 | 87.630 | Alive | . | . | 91 | 25 |
| 265 | 88.130 | Alive | . | . | 91 | 24 |
| 266 | 88.220 | Alive | . | . | 91 | 23 |
| 267 | 88.720 | Alive | . | . | 91 | 22 |
| 268 | 88.720 | Alive | . | . | 91 | 21 |
| 269 | 89.050 | Alive | . | . | 91 | 20 |
| 270 | 89.080 | Alive | . | . | 91 | 19 |
| 271 | 90.820 | Alive | . | . | 91 | 18 |
| 272 | 91.220 | Alive | . | . | 91 | 17 |
| 273 | 91.380 | Alive | . | . | 91 | 16 |
| 274 | 91.510 | Alive | . | . | 91 | 15 |
| 275 | 92.430 | Alive | . | . | 91 | 14 |
| 276 | 92.730 | Alive | . | . | 91 | 13 |
| 277 | 94.340 | Alive | . | . | 91 | 12 |
| 278 | 95.720 | Alive | . | . | 91 | 11 |
| 279 | 96.250 | Alive | . | . | 91 | 10 |
| 280 | 97.040 | Alive | . | . | 91 | 9 |
| 281 | 97.140 | Alive | . | . | 91 | 8 |
| 282 | 97.170 | Alive | . | . | 91 | 7 |
| 283 | 98.130 | Alive | . | . | 91 | 6 |
| 284 | 98.590 | Alive | . | . | 91 | 5 |
| 285 | 98.820 | Alive | . | . | 91 | 4 |
| 286 | 99.900 | Alive | . | . | 91 | 3 |
| 287 | 100.660 | Alive | . | . | 91 | 2 |
| 288 | 102.400 | Alive | . | . | 91 | 1 |
| 289 | 104.050 | Alive | . | . | 91 | 0 |

| **Overall Comparisons** | | | |
| --- | --- | --- | --- |
|  | Chi-Square | df | P-value |
| Log Rank (Mantel-Cox) | 1.806 | 1 | **.179** |
| Plat.gps. | | | |


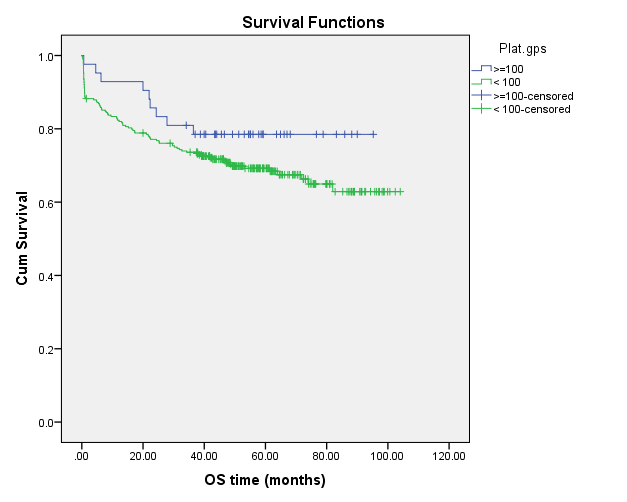


**CD 79a Qualitative**

**Cox Regression**

| **Case Processing Summary** | | | |
| --- | --- | --- | --- |
|  | | N | Percent |
| Cases available in analysis | Eventa | 100 | 30.2% |
| Censored | 231 | 69.8% |
| Total | 331 | 100.0% |
| a. Dependent Variable: OS time (months) | | | |

| **Categorical Variable Codings** | | | |
| --- | --- | --- | --- |
|  | | Frequency | (1) |
| Age.gps1 | 1.00==< 10 years | 247 | 0 |
| 3.00=> 10 years | 84 | 1 |
| 11. CD79a (Qualitative) | 1.0=Positive | 281 | 1 |
| 2.0=Negative | 50 | 0 |
| BP.blasts | 1.0=>= 50 | 129 | 0 |
| 2.0=< 50 | 202 | 1 |
| TLC.gps1 | 1.0==< 100 | 300 | 0 |
| 2.0=> 100 | 31 | 1 |

**Forward Stepwise (Likelihood Ratio)**

| **Variables in the Equation** | | | | |  |
| --- | --- | --- | --- | --- | --- |
|  | | p-value | HR | 95.0% CI for HR | |
| Lower | Upper |
|  | Age.gps1 | **.025** | 1.609 | 1.062 | 2.438 |
| 11. CD79a (Qualitative) | **.045** | 2.037 | 1.017 | 4.080 |

***HR: Hazard ratio, CI: confidence interval***

**On multivariate analysis using Cox-proportional hazard regression model; the independent factors that significantly affect the overall survival (OS) were age and CD79a.**

**Patients with age > 10 years had worse** **OS compared to those with age =< 10 years (HR: 1.6 [95%CI:1.1-2.4), p=0.025.**

**Also patients with positive CD79a had worse OS compared to those with negative CD79a (HR: 2.0 [95%CI:1.0-4.1), p=0.045.**

**CD 79a Percent (%)**

**Cox Regression**

| **Case Processing Summary** | | | |
| --- | --- | --- | --- |
|  | | N | Percent |
| Cases available in analysis | Eventa | 91 | 27.5% |
| Censored | 206 | 62.2% |
| Total | **297** | 89.7% |
| Cases dropped | Cases with missing values | 34 | 10.3% |
| Total | | 331 | 100.0% |
| a. Dependent Variable: OS time (months) | | | |

| **Categorical Variable Codings** | | | |
| --- | --- | --- | --- |
|  | | Frequency | (1) |
| Age.gps1 | 1.00==< 10 years | 219 | 0 |
| 3.00=> 10 years | 78 | 1 |
| Percent | 1.00=< 43.0 | 148 | 0 |
| 2.00=>=43.0 | 149 | 1 |
| BP.blasts | 1.0=>= 50 | 113 | 0 |
| 2.0=< 50 | 184 | 1 |
| TLC.gps1 | 1.0==< 100 | 272 | 0 |
| 2.0=> 100 | 25 | 1 |

**Method = Forward Stepwise (Likelihood Ratio)**

| **Variables in the Equation** | | | | | |
| --- | --- | --- | --- | --- | --- |
|  | | P-value | HR | 95.0% CI for HR | |
| Lower | Upper |
|  | Age.gps1 | **.031** | 1.608 | 1.044 | 2.477 |
| Percent | **<0.001** | 3.964 | 2.446 | 6.423 |

**CD 79a MFI**

**Cox Regression**

| **Case Processing Summary** | | | |
| --- | --- | --- | --- |
|  | | N | Percent |
| Cases available in analysis | Eventa | 89 | 26.9% |
| Censored | 188 | 56.8% |
| Total | **277** | 83.7% |
| Cases dropped | Cases with missing values | 54 | 16.3% |
| Total | | 331 | 100.0% |
| a. Dependent Variable: OS time (months) | | | |

| **Categorical Variable Codings** | | | |
| --- | --- | --- | --- |
|  | | Frequency | (1) |
| Age.gps1 | 1.00==< 10 years | 200 | 0 |
| 3.00=> 10 years | 77 | 1 |
| MFI1 | 1.00=< 77 | 138 | 0 |
| 2.00=>=77 | 139 | 1 |
| BP.blasts | 1.0=>= 50 | 113 | 0 |
| 2.0=< 50 | 164 | 1 |
| TLC.gps1 | 1.0==< 100 | 253 | 0 |
| 2.0=> 100 | 24 | 1 |

**Method = Forward Stepwise (Likelihood Ratio)**

| **Variables in the Equation** | | | | | |
| --- | --- | --- | --- | --- | --- |
|  | | P-value | HR | 95.0% CI for HR | |
| Lower | Upper |
|  | Age.gps1 | **.021** | 1.667 | 1.079 | 2.577 |
| MFI1 | **<0.001** | 6.185 | 3.588 | 10.664 |

**CD 79a MFI/ISO**

**Cox Regression**

| **Case Processing Summary** | | | |
| --- | --- | --- | --- |
|  | | N | Percent |
| Cases available in analysis | Eventa | 89 | 26.9% |
| Censored | 188 | 56.8% |
| Total | **277** | 83.7% |
| Cases dropped | Cases with missing values | **54** | 16.3% |
| Total | | 331 | 100.0% |
| a. Dependent Variable: OS time (months) | | | |

| **Categorical Variable Codings** | | | |
| --- | --- | --- | --- |
|  | | Frequency | (1) |
| Age.gps1 | 1.00==< 10 years | 200 | 0 |
| 3.00=> 10 years | 77 | 1 |
| MFI/ISO1 | 1.00=< 4.8 | 136 | 1 |
| 2.00=>=4.8 | 141 | 0 |
| BP.blasts | 1.0=>= 50 | 113 | 0 |
| 2.0=< 50 | 164 | 1 |
| TLC.gps1 | 1.0==< 100 | 253 | 0 |
| 2.0=> 100 | 24 | 1 |

**Method = Forward Stepwise (Likelihood Ratio)**

| **Variables in the Equation** | | | | | |
| --- | --- | --- | --- | --- | --- |
|  | | P-value | HR | 95.0% CI for HR | |
| Lower | Upper |
|  | Age.gps1 | **.027** | 1.633 | 1.057 | 2.522 |
| MFI/ISO1 | **<0.001** | .266 | .164 | .431 |

**CD 79a MFI-ISO**

**Cox Regression**

| **Case Processing Summary** | | | |
| --- | --- | --- | --- |
|  | | N | Percent |
| Cases available in analysis | Eventa | 89 | 26.9% |
| Censored | 188 | 56.8% |
| Total | 277 | 83.7% |
| Cases dropped | Cases with missing values | 54 | 16.3% |
| Total | | 331 | 100.0% |
| a. Dependent Variable: OS time (months) | | | |

| **Categorical Variable Codings** | | | |
| --- | --- | --- | --- |
|  | | Frequency | (1) |
| Age.gps1 | 1.00==< 10 years | 200 | 0 |
| 3.00=> 10 years | 77 | 1 |
| MFI-ISO1 | 1.00=< 60 | 136 | 0 |
| 2.00=>=60 | 141 | 1 |
| BP.blasts | 1.0=>= 50 | 113 | 0 |
| 2.0=< 50 | 164 | 1 |
| TLC.gps1 | 1.0==< 100 | 253 | 0 |
| 2.0=> 100 | 24 | 1 |

**Method = Forward Stepwise (Likelihood Ratio)**

| **Variables in the Equation** | | | | | |
| --- | --- | --- | --- | --- | --- |
|  | | P-value | HR | 95.0% CI for HR | |
| Lower | Upper |
|  | Age.gps1 | .034 | 1.601 | 1.036 | 2.475 |
| MFI-ISO1 | <0.001 | 5.219 | 3.098 | 8.791 |

**Supplementary table: (3) : Cox regression**
